# Supplementary material for: Synthesis of fluoroolefin derivatives by nickel(ii)-catalyzed trifluorovinylation and 1,2,2-trifluoroethylation of cinnamyl alcohols
Source: Royal Society of Chemistry journal article supplement (doi:10.1039/d2ob01078j), 2022-01-01
Supplement: d2ob01078j1.pdf [file d2ob01078j1.pdf]

# **Synthesis of Fluoroolefin Derivatives by Nickel(II)–Catalyzed trifluorovinylolation and 1,2,2-Trifluoroethylation of cinnamyl alcohols**

Haifeng Wu,<sup>a,b</sup> Min Zhou,<sup>b</sup> Li Qiao,<sup>b,\*</sup> and Pengfei Zhang<sup>a,b,\*</sup>

<sup>a</sup> College of Pharmaceutical Science, Zhejiang University of Technology, Hangzhou, 310014, China

<sup>b</sup> College of Material, Chemistry and Chemical Engineering, Key Laboratory of Organosilicon Chemistry and Material Technology of Ministry of Education, Hangzhou Normal University, Hangzhou, 311121, China

Email: 11837066@zju.edu.cn (Qiao, L.), pfzhang@hznu.edu.cn (Zhang, P.)

## **Supporting Information**

### **Table of Contents**

|                                             |           |
|---------------------------------------------|-----------|
| <b>1. General Information.....</b>          | <b>2</b>  |
| <b>2. General Procedure.....</b>            | <b>2</b>  |
| <b>3. Characterization of Products.....</b> | <b>4</b>  |
| <b>4. Copies of NMR Spectra.....</b>        | <b>16</b> |

## 1. General Information

Unless otherwise noted, materials were obtained from commercial suppliers and used without further purification. All reactions were performed in a heating mantle in a sealed tube unless otherwise noted. Thin-layer chromatography was performed using silica gel 60 F254 and visualized using UV light. Column chromatography was performed with silica gel (mesh 300–400).  $^1\text{H}$  NMR,  $^{13}\text{C}$  NMR and  $^{19}\text{F}$  NMR spectra were recorded on a Bruker Avance 600 MHz spectrometer in  $\text{CDCl}_3$  with  $\text{Me}_4\text{Si}$  as an internal standard. Data were reported as follows: chemical shift in ppm ( $\delta$ ), multiplicity (s = singlet, d = doublet, t = triplet, q = quartet, br = broad, and m = multiplet), coupling constant in hertz (Hz) and integration. Analytical thin layer chromatography (TLC) was performed on Merck precoated TLC (silica gel 60 F254) plates. Compounds for HRMS were analyzed by positive-mode electrospray ionization (ESI) using an Agilent 6530 QTOF mass spectrometer.

## 2. General Procedure

### 2.1 General procedure for the synthesis of allyl alcohol **1**

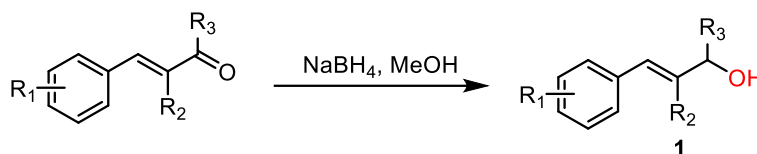

Method A: The mixture of acrolein derivatives (10 mmol) in methanol (20 mL) was cooled down to  $0\text{ }^\circ\text{C}$ . Then, sodium borohydride (15 mmol, 568 mg) was added in five batches, and the resulting mixture was stirred for 2 h. After completion of the reaction as indicated by TLC, the reaction mixture was then quenched with saturated  $\text{NaHCO}_3$  solution and extracted with  $\text{EtOAc}$  ( $3 \times 25$  mL). Organic layers were dried over anhydrous  $\text{MgSO}_4$  and concentrated under reduced pressure. The residue was purified by silica gel column chromatography (200-300 mesh silica gel) to afford product **1**.

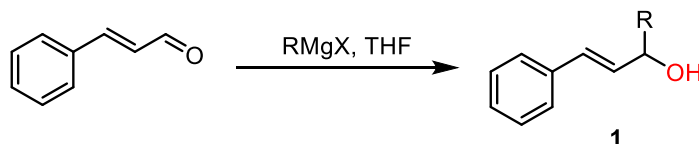

Method B: The mixture of acrolein derivatives (5 mmol) in anhydrous  $\text{THF}$  (10 mL) was cooled down to  $0\text{ }^\circ\text{C}$ . Then, the  $\text{RMgX}$  (6 mmol, 1.2 equiv.) was added, and the resulting mixture was

stirred for 3 h. After completion, the reaction mixture was then quenched with diluted HCl solution (5%, 10 mL) and extracted with EtOAc (3×10 mL). Organic layers were dried over anhydrous MgSO<sub>4</sub> and concentrated under reduced pressure. The residue was purified by silica gel column chromatography (200-300 mesh silica gel) to afford product 1.

## 2.2 General procedure for the synthesis of organozinc reagent TFVZ

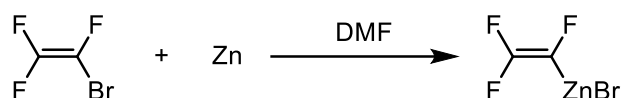

To a mixture of zinc dust (2.5 mol, 16.3 g) and anhydrous DMF (250 mL), was dropwise added 1-bromo-1,2,2-trifluoroethylene (21 mol, 34g) through a dry-ice condenser. Then, the resulting mixture was stirred at room temperature for 3 h. The mixture was used without further purification. The molar concentration of organozinc reagent in DMF is 0.84 mol/L.

## 2.3 General procedure for the synthesis of organosilicon reagent TFVTMS

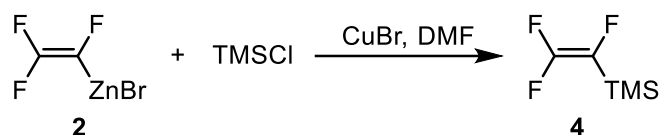

To the DMF solution of organozinc reagent **2** (1 mol, 1.2 mL) was dropwise added dry chlorotrimethylsilane (2 mol, 217 mg), and the resulting mixture was cooled down to 0 °C. After the addition of CuBr (10 mol%, 14 mg) to the system, the mixture was stirred overnight. Then, an amount of ethylene glycol was then added to the reaction mixture, to ensure that all the chlorotrimethylsilane was removed from the reaction mixture, thus making isolation of the final product more efficient. The reaction mixture was then stirred overnight. Flash distillation of the reaction mixture followed by slow, careful fractional distillation afford the organosilicon reagent TFVTMS as a colorless liquid.

## 2.4 General procedure for the synthesis of 2

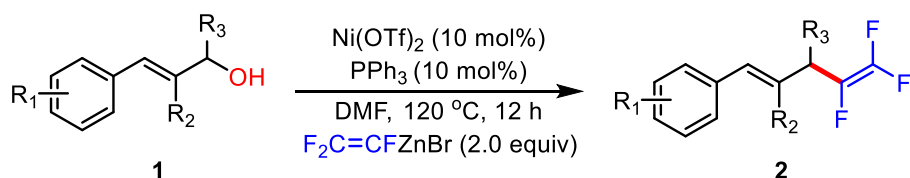

To a mixture of allyl alcohols (0.2 mmol), TFVZ (0.4 mmol, 25% in DMF, w/w), PPh<sub>3</sub> (10 mol%, 5.24 mg) was added Ni(CF<sub>3</sub>SO<sub>3</sub>)<sub>2</sub> (10 mol%, 7.14 mg). The resulting mixture was then sealed and

stirred for 12 h at 120 °C under air condition. After completion of the reaction as indicated by TLC, the reaction mixture was then cooled to room temperature and extracted with EtOAc (3×10 mL) and H<sub>2</sub>O (5 mL). Organic layers were dried over anhydrous MgSO<sub>4</sub> and concentrated under reduced pressure. The residue was purified by silica gel column chromatography (200-300 mesh silica gel) with petroleum ether and ethyl acetate (v/v 20/1) as the eluent to give the pure product **2**.

## 2.5 General procedure for the synthesis of **3**

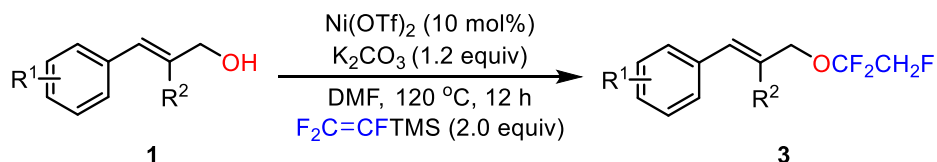

To a mixture of allyl alcohols (0.2 mmol), TFVTMS (0.4 mmol, 62 mg), K<sub>2</sub>CO<sub>3</sub> (120 mol%, 33 mg) was added Ni(CF<sub>3</sub>SO<sub>3</sub>)<sub>2</sub> (10 mol%, 7.14 mg). The resulting mixture was then stirred for 12 h at 120 °C under air condition. After completion of the reaction, the reaction mixture was cooled to room temperature and extracted with ethyl acetate (3×10 mL) and H<sub>2</sub>O (5 mL). The organic phase was dried over anhydrous Na<sub>2</sub>SO<sub>4</sub>. The crude residue was obtained after evaporation of the solvent in vacuum, and the residue was purified by flash chromatography with petroleum ether and ethyl acetate (v/v 20/1) as the eluent to give the pure product **3**.

## 3. Characterization of Products

### (*E*)-(4,5,5-trifluoropenta-1,4-dien-1-yl)benzene (**2a**)

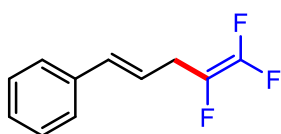

Obtained as a white liquid (38 mg, 97% yield). <sup>1</sup>H NMR (500 MHz, CDCl<sub>3</sub>) δ 7.36 (d, *J* = 7.5 Hz, 2H), 7.31 (dd, *J* = 10.3, 4.9 Hz, 2H), 7.25 – 7.21 (m, 1H), 6.53 (d, *J* = 15.8 Hz, 1H), 6.14 (dt, *J* = 15.8, 6.6 Hz, 1H), 3.27 – 3.08 (m, 2H); <sup>13</sup>C NMR (126 MHz, CDCl<sub>3</sub>) δ 155.6-150.7 (m), 136.6, 133.5, 128.6, 128.5-128.1 (m), 127.7, 126.5, 121.9, 29.4 (dd, *J* = 20.2, 2.5 Hz); <sup>19</sup>F NMR (471 MHz, CDCl<sub>3</sub>) δ -105.0 (dd, *J* = 84.8, 33.0 Hz), -123.9 (dd, *J* = 113.0, 88.0 Hz), -173.2 (dd, *J* = 113.0, 33.0 Hz); HRMS (ESI<sup>+</sup>): Calculated for C<sub>11</sub>H<sub>9</sub>F<sub>3</sub>: [M+H]<sup>+</sup> 199.0729, Found 199.0732.

### (*E*)-1-methyl-4-(4,5,5-trifluoropenta-1,4-dien-1-yl)benzene (**2b**)

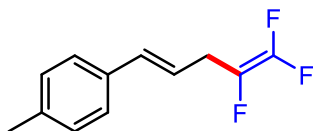

Obtained as a white liquid (41 mg, 96% yield).  $^1\text{H}$  NMR (500 MHz,  $\text{CDCl}_3$ )  $\delta$  7.25 (d,  $J = 7.9$  Hz, 2H), 7.12 (d,  $J = 7.9$  Hz, 2H), 6.50 (d,  $J = 15.8$  Hz, 1H), 6.09 (dt,  $J = 15.6, 6.6$  Hz, 1H), 3.20 – 3.11 (m, 2H), 2.33 (s, 3H);  $^{13}\text{C}$  NMR (126 MHz,  $\text{CDCl}_3$ )  $\delta$  153.2 (ddd,  $J = 286.7, 273.2, 46.6$  Hz), 137.6, 133.86, 133.4, 129.3, 128.2 (ddd,  $J = 197.9, 147.4, 29.1$  Hz), 126.2, 120.8, 29.4 (dd,  $J = 22.2, 2.2$  Hz), 21.2.  $^{19}\text{F}$  NMR (471 MHz,  $\text{CDCl}_3$ )  $\delta$  -105.2 (dd,  $J = 87.2, 32.6$  Hz), -124.0 (dd,  $J = 114.4, 87.1$  Hz), -173.2 (dd,  $J = 114.4, 32.6$  Hz); HRMS (ESI+): Calculated for  $\text{C}_{12}\text{H}_{11}\text{F}_3$ :  $[\text{M}+\text{H}]^+$  213.0886, Found 231.0893.

**(E)-1-(tert-butyl)-4-(4,5,5-trifluoropenta-1,4-dien-1-yl)benzene (2c)**

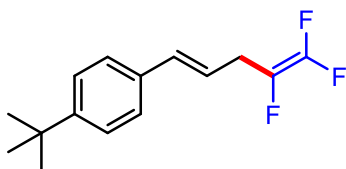

Obtained as a white liquid (47 mg, 93% yield).  $^1\text{H}$  NMR (500 MHz,  $\text{CDCl}_3$ )  $\delta$  7.34 (d,  $J = 8.4$  Hz, 2H), 7.30 (d,  $J = 8.4$  Hz, 2H), 6.52 (d,  $J = 15.8$  Hz, 1H), 6.10 (dt,  $J = 15.8, 6.7$  Hz, 1H), 3.24 – 3.08 (m, 2H), 1.31 (s, 9H);  $^{13}\text{C}$  NMR (126 MHz,  $\text{CDCl}_3$ )  $\delta$  150.9, 133.9, 133.3, 126.0, 125.5, 121.1, 34.6, 31.3, 29.4 (dd,  $J = 22.2, 2.1$  Hz);  $^{19}\text{F}$  NMR (471 MHz,  $\text{CDCl}_3$ )  $\delta$  -105.1 (dd,  $J = 87.0, 32.6$  Hz), -124.0 (dd,  $J = 114.5, 86.9$  Hz), -173.2 (dd,  $J = 114.5, 32.4$  Hz); HRMS (ESI+): Calculated for  $\text{C}_{15}\text{H}_{17}\text{F}_3$ :  $[\text{M}+\text{H}]^+$  255.1355, Found 255.1367.

**(E)-1-methoxy-4-(4,5,5-trifluoropenta-1,4-dien-1-yl)benzene (2d)**

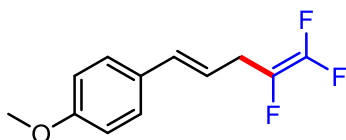

Obtained as a white liquid (44 mg, 96% yield).  $^1\text{H}$  NMR (500 MHz,  $\text{CDCl}_3$ )  $\delta$  7.24 – 7.19 (m, 2H), 6.81 – 6.74 (m, 2H), 6.39 (d,  $J = 15.8$  Hz, 1H), 5.91 (dt,  $J = 15.8, 6.7$  Hz, 1H), 3.71 (s, 3H), 3.11 – 3.03 (m, 2H);  $^{13}\text{C}$  NMR (126 MHz,  $\text{CDCl}_3$ )  $\delta$  159.3, 153.2 (ddd,  $J = 286.5, 273.1, 46.6$  Hz), 132.9, 129.5, 127.5 (ddd,  $J = 235.2, 52.8, 15.2$  Hz), 127.5, 119.6, 114.0, 55.3, 29.3 (dd,  $J = 22.2, 2.1$  Hz);  $^{19}\text{F}$  NMR (471 MHz,  $\text{CDCl}_3$ )  $\delta$  -105.2 (dd,  $J = 87.2, 32.4$  Hz), -124.1 (dd,  $J = 114.4, 87.3$  Hz),

-173.2 (dd,  $J = 114.4, 32.7$  Hz); HRMS (ESI<sup>+</sup>): Calculated for C<sub>12</sub>H<sub>11</sub>F<sub>3</sub>O: [M+H]<sup>+</sup> 229.0835, Found 229.0825.

**(E)-1-fluoro-4-(4,5,5-trifluoropenta-1,4-dien-1-yl)benzene (2e)**

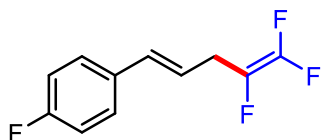

Obtained as a white liquid (39 mg, 90% yield). <sup>1</sup>H NMR (500 MHz, CDCl<sub>3</sub>) δ 7.32 (dd,  $J = 8.6, 5.4$  Hz, 2H), 7.02 – 6.98 (m, 2H), 6.49 (d,  $J = 15.8$  Hz, 1H), 6.06 (dt,  $J = 15.8, 6.6$  Hz, 1H), 3.23 – 3.12 (m, 2H); <sup>13</sup>C NMR (126 MHz, CDCl<sub>3</sub>) δ 162.4 (d,  $J = 246.9$  Hz), 153.2 (ddd,  $J = 286.7, 273.2, 46.4$  Hz), 132.8 (d,  $J = 3.3$  Hz), 132.3, 127.8 (d,  $J = 8.0$  Hz), 127.2 (ddd,  $J = 235.3, 53.0, 15.6$  Hz), 121.7, 115.5 (d,  $J = 21.6$  Hz), 29.3 (dd,  $J = 22.3, 2.1$  Hz); <sup>19</sup>F NMR (471 MHz, CDCl<sub>3</sub>) δ -104.9 (dd,  $J = 86.7, 32.8$  Hz), -114.3 (s), -123.8 (dd,  $J = 114.6, 86.6$  Hz), -173.3 (dd,  $J = 114.6, 32.7$  Hz); HRMS (ESI<sup>+</sup>): Calculated for C<sub>11</sub>H<sub>8</sub>F<sub>4</sub>: [M+H]<sup>+</sup> 217.0635, Found 217.0641.

**(E)-1-chloro-4-(4,5,5-trifluoropenta-1,4-dien-1-yl)benzene (2f)**

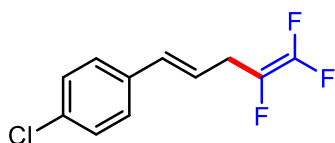

Obtained as a white liquid (46 mg, 99% yield). <sup>1</sup>H NMR (500 MHz, CDCl<sub>3</sub>) δ 7.29 – 7.25 (m, 4H), 6.48 (d,  $J = 15.8$  Hz, 1H), 6.12 (dt,  $J = 15.8, 6.6$  Hz, 1H), 3.22 – 3.13 (m, 2H); <sup>13</sup>C NMR (126 MHz, CDCl<sub>3</sub>) δ 156.5 – 149.4 (m), 135.1, 133.4, 132.3, 128.8, 127.5, 127.1 (ddd,  $J = 235.5, 53.0, 15.7$  Hz), 122.7, 29.3 (dd,  $J = 22.3, 2.1$  Hz); <sup>19</sup>F NMR (471 MHz, CDCl<sub>3</sub>) δ -104.7 (dd,  $J = 86.4, 32.9$  Hz), -123.7 (dd,  $J = 114.7, 86.3$  Hz), -173.3 (dd,  $J = 114.6, 32.9$  Hz); HRMS (ESI<sup>+</sup>): Calculated for C<sub>11</sub>H<sub>8</sub>ClF<sub>3</sub>: [M+H]<sup>+</sup> 233.0339, Found 233.0329.

**(E)-1-bromo-4-(4,5,5-trifluoropenta-1,4-dien-1-yl)benzene (2g)**

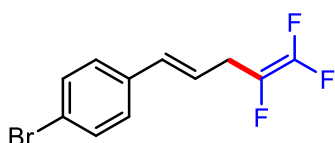

Obtained as a white liquid (52 mg, 93% yield). <sup>1</sup>H NMR (500 MHz, CDCl<sub>3</sub>) δ 7.45 – 7.40 (m, 2H), 7.22 (d,  $J = 8.4$  Hz, 2H), 6.47 (d,  $J = 15.9$  Hz, 1H), 6.14 (dt,  $J = 15.8, 6.6$  Hz, 1H), 3.21 – 3.12 (m, 2H); <sup>13</sup>C NMR (126 MHz, CDCl<sub>3</sub>) δ 153.2 (ddd,  $J = 286.8, 273.5, 46.2$  Hz), 135.6, 132.4, 131.7,

127.8, 127.1 (ddd,  $J = 68.6, 40.7, 15.7$  Hz), 122.8, 121.5, 29.3 (dd,  $J = 22.3, 2.1$  Hz).  $^{19}\text{F}$  NMR (471 MHz,  $\text{CDCl}_3$ )  $\delta$  -104.7 (dd,  $J = 86.4, 32.9$  Hz), -123.6 (dd,  $J = 114.7, 86.3$  Hz), -173.3 (dd,  $J = 114.6, 32.9$  Hz); HRMS (ESI+): Calculated for  $\text{C}_{11}\text{H}_8\text{BrF}_3$ :  $[\text{M}+\text{H}]^+$  276.9834, Found 276.9830.

**(E)-1-(trifluoromethyl)-4-(4,5,5-trifluoropenta-1,4-dien-1-yl)benzene (2h)**

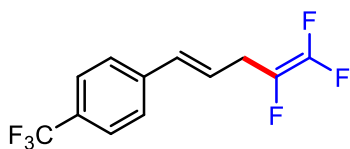

Obtained as a white liquid (45 mg, 85% yield); M.p. 189-190 °C.  $^1\text{H}$  NMR (500 MHz,  $\text{CDCl}_3$ )  $\delta$  7.60 (s, 1H), 7.51 (dd,  $J = 14.8, 7.7$  Hz, 2H), 7.44 – 7.41 (m, 1H), 6.57 (d,  $J = 15.9$  Hz, 1H), 6.23 (dt,  $J = 15.9, 6.6$  Hz, 1H), 3.21 (dddd,  $J = 21.7, 8.1, 4.0, 2.6$  Hz, 2H);  $^{13}\text{C}$  NMR (126 MHz,  $\text{CDCl}_3$ )  $\delta$  153.2 (ddd,  $J = 287.3, 273.5, 46.2$  Hz), 137.4, 132.2, 131.1 (d,  $J = 32.3$  Hz), 129.4, 129.1, 126.9 (ddd,  $J = 235.5, 53.0, 15.8$  Hz), 125.2, 124.6 – 122.0 (m), 29.3 (dd,  $J = 22.3, 2.1$  Hz);  $^{19}\text{F}$  NMR (471 MHz,  $\text{CDCl}_3$ )  $\delta$  -62.8 (s), -104.5 (dd,  $J = 86.0, 33.0$  Hz), -123.5 (dd,  $J = 114.8, 85.9$  Hz), -173.3 (dd,  $J = 114.7, 33.0$  Hz); HRMS (ESI+): Calculated for  $\text{C}_{12}\text{H}_8\text{F}_6$ :  $[\text{M}+\text{H}]^+$  267.0603, Found 267.0596.

**(E)-1-methoxy-2-(4,5,5-trifluoropenta-1,4-dien-1-yl)benzene (2j)**

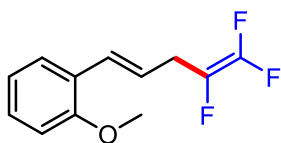

Obtained as a white liquid (43 mg, 95% yield).  $^1\text{H}$  NMR (500 MHz,  $\text{CDCl}_3$ )  $\delta$  7.40 (dd,  $J = 7.6, 1.4$  Hz, 1H), 7.25 – 7.17 (m, 1H), 6.93 – 6.90 (m, 1H), 6.88-6.82 (m, 2H), 6.16 (dt,  $J = 15.9, 6.7$  Hz, 1H), 3.84 (s, 3H), 3.25 – 3.11 (m, 2H);  $^{13}\text{C}$  NMR (126 MHz,  $\text{CDCl}_3$ )  $\delta$  156.6, 153.2 (ddd,  $J = 286.2, 273.1, 46.6$  Hz), 128.8, 128.5, 127.4 (ddd,  $J = 52.8, 40.2, 26.3$  Hz), 126.9, 126.9, 125.7, 122.5, 120.7, 110.9, 55.4, 29.8 (dd,  $J = 22.2, 2.1$  Hz);  $^{19}\text{F}$  NMR (471 MHz,  $\text{CDCl}_3$ )  $\delta$  -105.3 (dd,  $J = 87.3, 32.5$  Hz), -124.0 (dd,  $J = 114.5, 87.2$  Hz), -173.1 (dd,  $J = 114.4, 32.5$  Hz); HRMS (ESI+): Calculated for  $\text{C}_{12}\text{H}_{11}\text{F}_3\text{O}$ :  $[\text{M}+\text{H}]^+$  229.0835, Found 229.0833.

**(E)-1-chloro-2-(4,5,5-trifluoropenta-1,4-dien-1-yl)benzene (2k)**

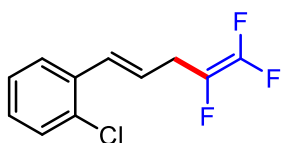

Obtained as a white liquid (43 mg, 92% yield); M.p. 149-150 °C.  $^1\text{H}$  NMR (500 MHz,  $\text{CDCl}_3$ )  $\delta$  7.49 (dd,  $J = 7.6, 1.7$  Hz, 1H), 7.34 (dd,  $J = 7.7, 1.5$  Hz, 1H), 7.24 – 7.14 (m, 2H), 6.93 (d,  $J = 15.8$  Hz, 1H), 6.13 (dt,  $J = 15.8, 6.7$  Hz, 1H), 3.27 – 3.17 (m, 2H);  $^{13}\text{C}$  NMR (126 MHz,  $\text{CDCl}_3$ )  $\delta$  153.2 (ddd,  $J = 287.1, 273.6, 46.5$  Hz), 134.8, 132.9, 129.9, 129.7, 128.8, 127.1 (ddd,  $J = 235.6, 52.9, 15.8$  Hz), 126.9 (d,  $J = 0.8$  Hz), 124.8, 29.6 (dd,  $J = 22.3, 2.1$  Hz);  $^{19}\text{F}$  NMR (471 MHz,  $\text{CDCl}_3$ )  $\delta$  -104.7 (dd,  $J = 86.3, 32.9$  Hz), -123.6 (dd,  $J = 114.6, 86.2$  Hz), -173.3 (dd,  $J = 114.7, 32.9$  Hz); HRMS (ESI+): Calculated for  $\text{C}_{11}\text{H}_8\text{ClF}_3$ :  $[\text{M}+\text{H}]^+$  233.0339, Found 233.0345.

**(E)-1-bromo-2-(4,5,5-trifluoropenta-1,4-dien-1-yl)benzene (2l)**

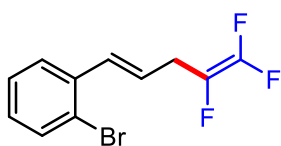

Obtained as a white liquid (52 mg, 93% yield).  $^1\text{H}$  NMR (500 MHz,  $\text{CDCl}_3$ )  $\delta$  7.45 – 7.40 (m, 2H), 7.25 – 7.19 (m, 2H), 6.47 (d,  $J = 15.9$  Hz, 1H), 6.14 (dt,  $J = 15.8, 6.6$  Hz, 1H), 3.21 – 3.12 (m, 2H);  $^{13}\text{C}$  NMR (126 MHz,  $\text{CDCl}_3$ )  $\delta$  153.2 (ddd,  $J = 287.0, 273.3, 46.3$  Hz), 137.7, 135.6, 132.3, 131.7, 127.8, 127.1 (ddd,  $J = 68.6, 40.5, 15.7$  Hz), 122.8, 121.5, 29.3 (dd,  $J = 22.3, 2.1$  Hz);  $^{19}\text{F}$  NMR (471 MHz,  $\text{CDCl}_3$ )  $\delta$  -104.7 (dd,  $J = 86.3, 32.9$  Hz), -123.6 (dd,  $J = 114.7, 86.2$  Hz), -173.3 (dd,  $J = 114.6, 32.9$  Hz); HRMS (ESI+): Calculated for  $\text{C}_{11}\text{H}_8\text{BrF}_3$ :  $[\text{M}+\text{H}]^+$  276.9834, Found 276.9837.

**(E)-5-(4,5,5-trifluoropenta-1,4-dien-1-yl)benzo[d][1,3]dioxole (2m)**

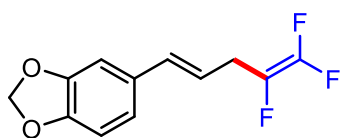

Obtained as a white liquid (40 mg, 83% yield).  $^1\text{H}$  NMR (500 MHz,  $\text{CDCl}_3$ )  $\delta$  7.26 (s, 2H), 6.90 (d,  $J = 1.5$  Hz, 1H), 6.79 (dd,  $J = 8.0, 1.5$  Hz, 1H), 6.75 (d,  $J = 8.0$  Hz, 1H), 6.44 (d,  $J = 15.7$  Hz, 1H), 5.96 (s, 1H), 3.15 (ddt,  $J = 21.9, 6.6, 4.0$  Hz, 2H);  $^{13}\text{C}$  NMR (126 MHz,  $\text{CDCl}_3$ )  $\delta$  148.1, 147.3, 133.1, 131.1, 120.9, 120.1, 108.3, 105.6, 101.1, 29.3 (dd,  $J = 22.2, 2.0$  Hz);  $^{19}\text{F}$  NMR (471 MHz,  $\text{CDCl}_3$ )  $\delta$  -105.0 (dd,  $J = 87.1, 32.6$  Hz), -123.9 (dd,  $J = 114.6, 86.8$  Hz), -173.3 (dd,  $J = 114.4, 32.7$  Hz); HRMS (ESI+): Calculated for  $\text{C}_{12}\text{H}_9\text{F}_3\text{O}_2$ :  $[\text{M}+\text{H}]^+$  243.0627, Found 243.0622.

**(E)-2-(4,5,5-trifluoropenta-1,4-dien-1-yl)naphthalene (2n)**



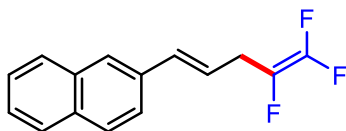

Obtained as a white liquid (47 mg, 95% yield).  $^1\text{H}$  NMR (500 MHz,  $\text{CDCl}_3$ )  $\delta$  7.81 – 7.76 (m, 3H), 7.71 (s, 1H), 7.57 (dd,  $J = 8.6, 1.7$  Hz, 1H), 7.48 – 7.41 (m, 2H), 6.69 (d,  $J = 15.8$  Hz, 1H), 6.27 (dt,  $J = 15.8, 6.6$  Hz, 1H), 3.27 – 3.19 (m, 2H);  $^{13}\text{C}$  NMR (126 MHz,  $\text{CDCl}_3$ )  $\delta$  153.2 (ddd,  $J = 286.7, 273.2, 46.5$  Hz), 134.1, 133.6, 133.6, 128.3, 128.0, 127.7, 128.5 – 126.0 (m), 125.96, 123.4, 122.3, 29.5 (dd,  $J = 22.2, 2.1$  Hz);  $^{19}\text{F}$  NMR (471 MHz,  $\text{CDCl}_3$ )  $\delta$  -104.8 (dd,  $J = 86.6, 32.7$  Hz), -123.7 (dd,  $J = 114.6, 86.6$  Hz), -173.1 (dd,  $J = 114.5, 32.7$  Hz); HRMS (ESI+): Calculated for  $\text{C}_{15}\text{H}_{11}\text{F}_3$ :  $[\text{M}+\text{H}]^+$  249.0886, Found 249.0878.

**(E)-(4,5,5-trifluoropenta-1,4-diene-1,3-diyl)dibenzene (2o)**

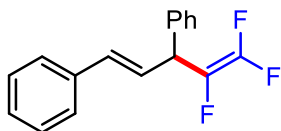

Obtained as a white liquid (51 mg, 93% yield).  $^1\text{H}$  NMR (500 MHz,  $\text{CDCl}_3$ )  $\delta$  7.42 – 7.36 (m, 4H), 7.35 – 7.30 (m, 5H), 7.25 (d,  $J = 6.2$  Hz, 1H), 6.57 (d,  $J = 16.0$  Hz, 1H), 6.50 – 6.38 (m, 1H), 4.63 – 4.46 (m, 1H);  $^{13}\text{C}$  NMR (126 MHz,  $\text{CDCl}_3$ )  $\delta$  153.3 (ddd,  $J = 288.7, 274.8, 46.4$  Hz), 138.2, 136.5, 133.1, 123.0 (ddd,  $J = 48.2, 30.3, 11.8$  Hz), 128.9, 128.7, 128.0, 127.95, 127.6, 126.5, 125.7, 45.3 (dd,  $J = 20.4, 1.9$  Hz);  $^{19}\text{F}$  NMR (471 MHz,  $\text{CDCl}_3$ )  $\delta$  -104.6 (dd,  $J = 84.0, 32.5$  Hz), -120.0 (dd,  $J = 114.3, 83.9$  Hz), -178.4 (dd,  $J = 114.4, 32.6$  Hz); HRMS (ESI+): Calculated for  $\text{C}_{17}\text{H}_{13}\text{F}_3$ :  $[\text{M}+\text{H}]^+$  275.1042, Found 275.1066.

**(E)-(4,5,5-trifluoro-2-methylpenta-1,4-dien-1-yl)benzene (2p)**

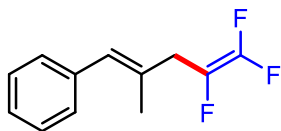

Obtained as a white liquid (28 mg, 65% yield); M.p. 172-173 °C.  $^1\text{H}$  NMR (500 MHz,  $\text{CDCl}_3$ )  $\delta$  7.36 – 7.30 (m, 2H), 7.25 – 7.21 (m, 3H), 6.41 (s, 1H), 3.16 – 3.08 (m, 2H), 1.89 (s, 3H);  $^{13}\text{C}$  NMR (126 MHz,  $\text{CDCl}_3$ )  $\delta$  137.5, 131.6, 128.8, 128.3, 128.1, 126.6, 36.7 (dd,  $J = 22.4, 2.3$  Hz), 17.3;  $^{19}\text{F}$  NMR (471 MHz,  $\text{CDCl}_3$ )  $\delta$  -104.3, -104.4, -104.5 (dd,  $J = 85.7, 32.5$  Hz), -104.5, -104.6, -123.6,

-123.8, -123.8 (dd,  $J = 114.5, 85.6$  Hz), -123.8, -124.0, -171.9, -171.9, -172.0 (dd,  $J = 114.5, 32.6$  Hz), -172.1, -172.17; HRMS (ESI<sup>+</sup>): Calculated for C<sub>12</sub>H<sub>11</sub>F<sub>3</sub>: [M+H]<sup>+</sup> 213.0886, Found 213.0895.

**(E)-(2-(2,3,3-trifluoroallyl)hept-1-en-1-yl)benzene (2q)**

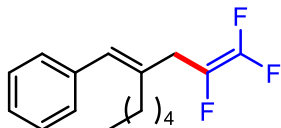

Obtained as a white liquid (40 mg, 75% yield). <sup>1</sup>H NMR (500 MHz, CDCl<sub>3</sub>) δ 7.34 – 7.31 (m, 2H), 7.26 – 7.17 (m, 3H), 6.40 (s, 1H), 3.12 (dd,  $J = 22.8, 2.6$  Hz, 2H), 2.27 – 2.20 (m, 2H), 1.48 (td,  $J = 14.9, 7.4$  Hz, 2H), 1.32 – 1.23 (m, 4H), 0.87 (t,  $J = 6.9$  Hz, 3H); <sup>13</sup>C NMR (126 MHz, CDCl<sub>3</sub>) δ 153.8 (ddd,  $J = 286.9, 272.9, 46.7$  Hz), 137.5, 136.3 (d,  $J = 2.5$  Hz), 128.6, 128.3, 128.2, 126.6, 33.8 (dd,  $J = 22.4, 2.3$  Hz), 31.8, 30.4, 27.7, 22.4, 14.0; <sup>19</sup>F NMR (471 MHz, CDCl<sub>3</sub>) δ -104.5 (dd,  $J = 85.9, 32.5$  Hz), -123.7 (dd,  $J = 114.4, 85.8$  Hz), -171.7 (dd,  $J = 114.4, 32.4$  Hz); HRMS (ESI<sup>+</sup>): Calculated for C<sub>16</sub>H<sub>19</sub>F<sub>3</sub>: [M+H]<sup>+</sup> 269.1512, Found 269.1505.

**(Z)-(2-chloro-4,5,5-trifluoropenta-1,4-dien-1-yl)benzene (2r)**

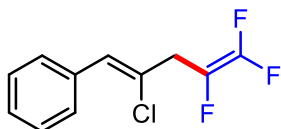

Obtained as a white liquid (36 mg, 78% yield). <sup>1</sup>H NMR (500 MHz, CDCl<sub>3</sub>) δ 7.61 (d,  $J = 7.4$  Hz, 2H), 7.38 – 7.35 (m, 2H), 7.34 – 7.27 (m, 1H), 6.63 (s, 1H), 3.50 – 3.38 (m, 2H); <sup>13</sup>C NMR (126 MHz, CDCl<sub>3</sub>) δ 134.2, 129.1, 128.3, 128.2, 127.7, 38.0 (dd,  $J = 22.6, 2.4$  Hz), 29.7; <sup>19</sup>F NMR (471 MHz, CDCl<sub>3</sub>) δ -102.3 (dd,  $J = 80.4, 33.3$  Hz), -121.8 (dd,  $J = 114.7, 80.3$  Hz), -173.9 (dd,  $J = 114.8, 33.4$  Hz); HRMS (ESI<sup>+</sup>): Calculated for C<sub>11</sub>H<sub>8</sub>ClF<sub>3</sub>: [M+H]<sup>+</sup> 233.0339, Found 233.0348.

**(E)-(3-(1,1,2-trifluoroethoxy)prop-1-en-1-yl)benzene (3a)**

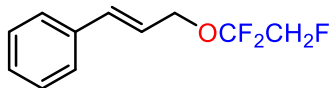

Obtained as a yellow liquid (39 mg, 90% yield). <sup>1</sup>H NMR (500 MHz, CDCl<sub>3</sub>) δ 7.33 (d,  $J = 7.4$  Hz, 2H), 7.27 – 7.25 (m, 2H), 7.23 – 7.14 (m, 1H), 6.60 (d,  $J = 15.9$  Hz, 1H), 6.20 (dt,  $J = 15.8, 6.4$  Hz, 1H), 4.54 (dd,  $J = 6.4, 1.1$  Hz, 2H), 4.48 (t,  $J = 8.5$  Hz, 1H), 4.39 (t,  $J = 8.5$  Hz, 1H); <sup>13</sup>C NMR (126 MHz, CDCl<sub>3</sub>) δ 136.1, 134.3, 128.7, 128.2, 126.7, 122.9, 80.1 (dt,  $J = 182.3, 38.3$  Hz), 64.5 (t,  $J =$

6.6 Hz);  $^{19}\text{F}$  NMR (471 MHz,  $\text{CDCl}_3$ )  $\delta$  -78.9 – -87.4 (m), -225.4 – -241.7 (m); HRMS (ESI+): Calculated for  $\text{C}_{11}\text{H}_{11}\text{F}_3\text{O}$ :  $[\text{M}+\text{H}]^+$  217.0835, Found 217.0850.

**(E)-1-methyl-4-(3-(1,1,2-trifluoroethoxy)prop-1-en-1-yl)benzene (3b)**

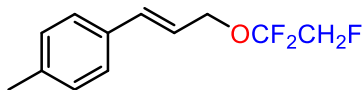

Obtained as a yellow liquid (37 mg, 80% yield).  $^1\text{H}$  NMR (500 MHz,  $\text{CDCl}_3$ )  $\delta$  7.29 (d,  $J$  = 8.1 Hz, 2H), 7.14 (d,  $J$  = 7.9 Hz, 2H), 6.63 (d,  $J$  = 15.9 Hz, 1H), 6.21 (dt,  $J$  = 15.8, 6.5 Hz, 1H), 4.59 (dd,  $J$  = 6.5, 1.1 Hz, 2H), 4.54 (t,  $J$  = 8.5 Hz, 1H), 4.45 (t,  $J$  = 8.5 Hz, 1H), 2.34 (s, 3H);  $^{13}\text{C}$  NMR (126 MHz,  $\text{CDCl}_3$ )  $\delta$  138.2, 134.4, 133.3, 129.3, 126.6, 121.8, 64.6, 21.2;  $^{19}\text{F}$  NMR (471 MHz,  $\text{CDCl}_3$ )  $\delta$  -81.1 – -86.7 (m), -235.4 (tt,  $J$  = 46.2, 16.1 Hz); HRMS (ESI+): Calculated for  $\text{C}_{12}\text{H}_{13}\text{F}_3\text{O}$ : 231.0991, Found 231.0978.

**(E)-1-methoxy-4-(3-(1,1,2-trifluoroethoxy)prop-1-en-1-yl)benzene (3c)**

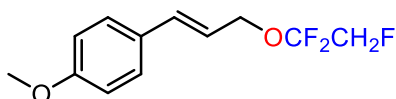

Obtained as a yellow liquid (47 mg, 95% yield).  $^1\text{H}$  NMR (500 MHz,  $\text{CDCl}_3$ )  $\delta$  7.34 (d,  $J$  = 8.7 Hz, 2H), 6.86 (d,  $J$  = 8.7 Hz, 2H), 6.61 (d,  $J$  = 15.8 Hz, 1H), 6.13 (dt,  $J$  = 15.7, 6.6 Hz, 1H), 4.58 (d,  $J$  = 6.6 Hz, 2H), 4.54 (t,  $J$  = 8.5 Hz, 1H), 4.45 (t,  $J$  = 8.5 Hz, 1H), 3.81 (s, 3H);  $^{13}\text{C}$  NMR (126 MHz,  $\text{CDCl}_3$ )  $\delta$  159.69, 134.16, 128.79, 127.95, 120.58, 114.05, 80.09 (dt,  $J$  = 68.5, 38.3 Hz), 64.73, 55.31;  $^{19}\text{F}$  NMR (471 MHz,  $\text{CDCl}_3$ )  $\delta$  -80.39 – -87.01 (m), -235.42 (s); HRMS (ESI+): Calculated for  $\text{C}_{12}\text{H}_{13}\text{F}_3\text{O}_2$ :  $[\text{M}+\text{H}]^+$  247.0940, Found 247.0949.

**(E)-1-fluoro-4-(3-(1,1,2-trifluoroethoxy)prop-1-en-1-yl)benzene (3d)**

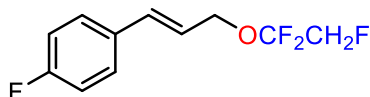

Obtained as a yellow liquid (44 mg, 95% yield).  $^1\text{H}$  NMR (500 MHz,  $\text{CDCl}_3$ )  $\delta$  7.43 – 7.32 (m, 2H), 7.07 – 6.98 (m, 2H), 6.63 (d,  $J$  = 15.9 Hz, 1H), 6.18 (dt,  $J$  = 15.8, 6.4 Hz, 1H), 4.59 (dd,  $J$  = 6.4, 1.3 Hz, 2H), 4.55 (t,  $J$  = 8.5 Hz, 1H), 4.46 (t,  $J$  = 8.5 Hz, 1H);  $^{13}\text{C}$  NMR (126 MHz,  $\text{CDCl}_3$ )  $\delta$  162.7 (d,  $J$  = 247.7 Hz), 133.1, 132.2, 128.3 (d,  $J$  = 8.1 Hz), 122.7 (d,  $J$  = 2.2 Hz), 120.9 (d,  $J$  = 21.4 Hz), 115.6 (d,  $J$  = 21.7 Hz), 80.0 (dt,  $J$  = 182.2, 38.4 Hz), 64.3 (t,  $J$  = 6.6 Hz);  $^{19}\text{F}$  NMR (471 MHz,

CDCl<sub>3</sub>)  $\delta$  -83.9 (dt,  $J$  = 17.1, 8.7 Hz), -113.5 (ddd,  $J$  = 14.7, 9.1, 5.8 Hz), -224.6 – -247.8 (m); HRMS (ESI<sup>+</sup>): Calculated for C<sub>11</sub>H<sub>10</sub>F<sub>4</sub>O: [M+H]<sup>+</sup> 235.0741, Found 235.0755.

**(E)-1-chloro-4-(3-(1,1,2-trifluoroethoxy)prop-1-en-1-yl)benzene (3e)**

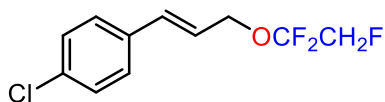

Obtained as a yellow liquid (36 mg, 72% yield). <sup>1</sup>H NMR (500 MHz, CDCl<sub>3</sub>)  $\delta$  7.38 – 7.28 (m, 4H), 6.62 (d,  $J$  = 15.9 Hz, 1H), 6.24 (dt,  $J$  = 15.8, 6.3 Hz, 1H), 4.63 – 4.59 (m, 2H), 4.55 (t,  $J$  = 8.4 Hz, 1H), 4.46 (t,  $J$  = 8.4 Hz, 1H); <sup>13</sup>C NMR (126 MHz, CDCl<sub>3</sub>)  $\delta$  134.6, 133.9, 132.9, 128.8, 127.9, 123.6, 64.2; <sup>19</sup>F NMR (471 MHz, CDCl<sub>3</sub>)  $\delta$  -80.4 – -85.9 (m), -235.5 (td,  $J$  = 46.5, 23.4 Hz); HRMS (ESI<sup>+</sup>): Calculated for C<sub>11</sub>H<sub>10</sub>ClF<sub>3</sub>O: [M+H]<sup>+</sup> 251.0445, Found 251.0438.

**(E)-1-bromo-4-(3-(1,1,2-trifluoroethoxy)prop-1-en-1-yl)benzene (3f)**

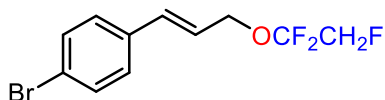

Obtained as a yellow liquid (52 mg, 90% yield). <sup>1</sup>H NMR (500 MHz, CDCl<sub>3</sub>)  $\delta$  7.43 – 7.36 (m, 2H), 7.27 – 7.11 (m, 2H), 6.53 (d,  $J$  = 15.9 Hz, 1H), 6.19 (dt,  $J$  = 15.9, 6.3 Hz, 1H), 4.52 (dd,  $J$  = 6.3, 1.2 Hz, 2H), 4.48 (t,  $J$  = 8.4 Hz, 1H), 4.39 (t,  $J$  = 8.4 Hz, 1H); <sup>13</sup>C NMR (126 MHz, CDCl<sub>3</sub>)  $\delta$  135.0, 132.9, 131.8, 128.2, 123.8, 122.1, 80.0 (d,  $J$  = 182.3 Hz), 64.2 (d,  $J$  = 6.7 Hz); <sup>19</sup>F NMR (471 MHz, CDCl<sub>3</sub>)  $\delta$  -83.9 (dt,  $J$  = 16.7, 8.5 Hz), -235.5 (tt,  $J$  = 46.2, 16.1 Hz); HRMS (ESI<sup>+</sup>): Calculated for C<sub>11</sub>H<sub>10</sub>BrF<sub>3</sub>O: [M+H]<sup>+</sup> 294.9940, Found 294.9952.

**(E)-1-methoxy-2-(3-(1,1,2-trifluoroethoxy)prop-1-en-1-yl)benzene (3g)**

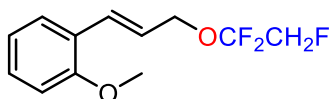

Obtained as a yellow liquid (47 mg, 95% yield). <sup>1</sup>H NMR (500 MHz, CDCl<sub>3</sub>)  $\delta$  7.43 (dd,  $J$  = 7.6, 1.6 Hz, 1H), 7.28 – 7.21 (m, 1H), 6.98 (d,  $J$  = 16.0 Hz, 1H), 6.93 (t,  $J$  = 7.5 Hz, 1H), 6.88 (d,  $J$  = 8.2 Hz, 1H), 6.29 (dt,  $J$  = 16.0, 6.5 Hz, 1H), 4.61 (dd,  $J$  = 6.5, 1.3 Hz, 2H), 4.54 (t,  $J$  = 8.6 Hz, 1H), 4.45 (t,  $J$  = 8.6 Hz, 1H), 3.85 (s, 3H); <sup>13</sup>C NMR (126 MHz, CDCl<sub>3</sub>)  $\delta$  157.0, 129.5, 129.3, 127.3, 125.0, 123.5, 123.3 – 118.5 (m), 120.7, 110.9, 80.1 (dt,  $J$  = 182.1, 38.2 Hz), 65.0 (t,  $J$  = 6.6 Hz), 55.45; <sup>19</sup>F NMR (471 MHz, CDCl<sub>3</sub>)  $\delta$  -77.7 – -87.4 (m), -227.6 – -243.5 (m); HRMS (ESI<sup>+</sup>): Calculated for C<sub>12</sub>H<sub>13</sub>F<sub>3</sub>O<sub>2</sub>: [M+H]<sup>+</sup> 247.0940, Found 247.0929.

**(E)-5-(3-(1,1,2-trifluoroethoxy)prop-1-en-1-yl)benzo[d][1,3]dioxole (3h)**

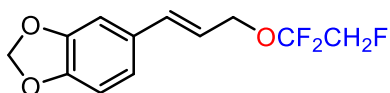

Obtained as a yellow liquid (34 mg, 65% yield). <sup>1</sup>H NMR (500 MHz, CDCl<sub>3</sub>) δ 6.93 (d, *J* = 1.5 Hz, 1H), 6.83 (dd, *J* = 8.0, 1.5 Hz, 1H), 6.76 (d, *J* = 8.0 Hz, 1H), 6.57 (d, *J* = 15.8 Hz, 1H), 6.10 (dt, *J* = 15.8, 6.5 Hz, 1H), 5.96 (s, 2H), 4.58 (dd, *J* = 6.5, 1.1 Hz, 2H), 4.54 (t, *J* = 8.5 Hz, 1H), 4.45 (t, *J* = 8.5 Hz, 1H); <sup>13</sup>C NMR (126 MHz, CDCl<sub>3</sub>) δ 148.1, 147.8, 134.2, 130.5, 121.6, 121.1, 108.3, 105.9, 101.2, 64.5; <sup>19</sup>F NMR (471 MHz, CDCl<sub>3</sub>) δ -80.7 – -88.1 (m), -235.43; HRMS (ESI<sup>+</sup>): Calculated for C<sub>12</sub>H<sub>11</sub>F<sub>3</sub>O<sub>3</sub>: [M+H]<sup>+</sup> 261.0733, Found 261.0750.

**(E)-1-chloro-2-(3-(1,1,2-trifluoroethoxy)prop-1-en-1-yl)benzene (3i)**

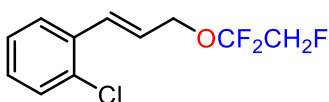

Obtained as a yellow liquid (44 mg, 88% yield). <sup>1</sup>H NMR (500 MHz, CDCl<sub>3</sub>) δ 7.61 – 7.49 (m, 1H), 7.36 (dd, *J* = 4.8, 2.8 Hz, 1H), 7.26 – 7.18 (m, 2H), 7.06 (d, *J* = 15.8 Hz, 1H), 6.35 – 6.10 (m, 1H), 4.71 – 4.62 (m, 2H), 4.56 (td, *J* = 8.5, 3.3 Hz, 1H), 4.50 – 4.44 (m, 1H); <sup>13</sup>C NMR (126 MHz, CDCl<sub>3</sub>) δ 134.2, 133.3, 130.2, 129.8, 129.2, 127.1, 126.9, 125.8, 121.0 (td, *J* = 264.4, 21.4 Hz), 80.0 (dt, *J* = 182.3, 38.2 Hz), 64.3 (t, *J* = 6.6 Hz); <sup>19</sup>F NMR (471 MHz, CDCl<sub>3</sub>) δ -83.9 (dt, *J* = 16.5, 8.4 Hz), -235.50; HRMS (ESI<sup>+</sup>): Calculated for C<sub>11</sub>H<sub>10</sub>ClF<sub>3</sub>O: [M+H]<sup>+</sup> 251.0445, Found 251.0459.

**(E)-1-bromo-2-(3-(1,1,2-trifluoroethoxy)prop-1-en-1-yl)benzene (3j)**

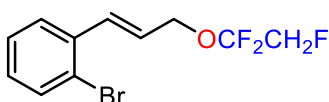

Obtained as a yellow liquid (50 mg, 85% yield). <sup>1</sup>H NMR (500 MHz, CDCl<sub>3</sub>) δ 7.54 – 7.39 (m, 2H), 7.31 – 7.20 (m, 2H), 6.60 (d, *J* = 15.8 Hz, 1H), 6.26 (dt, *J* = 15.7, 6.2 Hz, 1H), 4.59 (d, *J* = 6.2 Hz, 2H), 4.55 (td, *J* = 8.4, 1.1 Hz, 1H), 4.48 – 4.40 (m, 1H); <sup>13</sup>C NMR (126 MHz, CDCl<sub>3</sub>) δ 135.00, 132.90, 131.79, 128.17, 123.76, 122.07, 80.02 (dt, *J* = 182.4, 38.4 Hz), 64.19 (t, *J* = 6.6 Hz); <sup>19</sup>F NMR (471 MHz, CDCl<sub>3</sub>) δ -83.89 (dt, *J* = 16.4, 8.4 Hz), -235.45 (ddd, *J* = 46.2, 31.2, 16.1 Hz); HRMS (ESI<sup>+</sup>): Calculated for C<sub>11</sub>H<sub>10</sub>BrF<sub>3</sub>O: [M+H]<sup>+</sup> 294.9940 Found 294.9949.

**(E)-(2-methyl-3-(1,1,2-trifluoroethoxy)prop-1-en-1-yl)benzene (3k)**

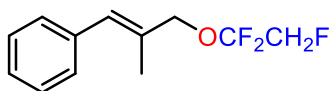

Obtained as a yellow liquid (42 mg, 92% yield).  $^1\text{H}$  NMR (500 MHz,  $\text{CDCl}_3$ )  $\delta$  7.35 – 7.32 (m, 2H), 7.28 (d,  $J = 7.3$  Hz, 2H), 7.25 – 7.22 (m, 1H), 6.55 (s, 1H), 4.55 (t,  $J = 8.5$  Hz, 1H), 4.52 – 4.41 (m, 3H), 1.91 (d,  $J = 0.9$  Hz, 3H);  $^{13}\text{C}$  NMR (126 MHz,  $\text{CDCl}_3$ )  $\delta$  136.9, 132.3, 128.95, 128.9, 128.2, 126.9, 121.0 (td,  $J = 264.0$ , 21.3 Hz), 80.1 (dt,  $J = 182.1$ , 38.4 Hz), 69.7 (t,  $J = 6.2$  Hz), 15.3;  $^{19}\text{F}$  NMR (471 MHz,  $\text{CDCl}_3$ )  $\delta$  -83.9 (dt,  $J = 16.7$ , 8.4 Hz), -235.4 (tt,  $J = 46.1$ , 16.2 Hz); HRMS (ESI+): Calculated for  $\text{C}_{12}\text{H}_{13}\text{F}_3\text{O}$ :  $[\text{M}+\text{H}]^+$  231.0991, Found 231.0977.

**(E)-2-((1,1,2-trifluoroethoxy)methyl)hept-1-en-1-ylbenzene (3l)**

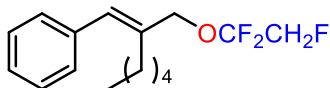

Obtained as a yellow liquid (52 mg, 90% yield).  $^1\text{H}$  NMR (500 MHz,  $\text{CDCl}_3$ )  $\delta$  7.35 – 7.30 (m, 2H), 7.26 – 7.22 (m, 3H), 6.56 (s, 1H), 4.56 (t,  $J = 8.5$  Hz, 1H), 4.51 (s, 2H), 4.46 (t,  $J = 8.5$  Hz, 1H), 2.31 – 2.26 (m, 2H), 1.58 – 1.40 (m, 2H), 1.34 – 1.21 (m, 4H), 0.87 (t,  $J = 6.8$  Hz, 3H);  $^{13}\text{C}$  NMR (126 MHz,  $\text{CDCl}_3$ )  $\delta$  136.9, 136.9, 129.1, 128.7, 128.2, 126.9, 121.0 (td,  $J = 264.1$ , 21.3 Hz), 80.1 (dt,  $J = 182.2$ , 38.4 Hz), 67.7 (t,  $J = 6.3$  Hz), 31.9, 28.5, 27.7, 22.4, 14.0;  $^{19}\text{F}$  NMR (471 MHz,  $\text{CDCl}_3$ )  $\delta$  -74.8 – -93.7 (m), -223.5 – -252.8 (m); HRMS (ESI+): Calculated for  $\text{C}_{16}\text{H}_{21}\text{F}_3\text{O}$ :  $[\text{M}+\text{H}]^+$  287.1617, Found 287.1610.

**(E)-2-((1,1,2-trifluoroethoxy)methyl)oct-1-en-1-ylbenzene (3m)**

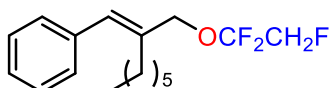

Obtained as a yellow liquid (48 mg, 80% yield).  $^1\text{H}$  NMR (500 MHz,  $\text{CDCl}_3$ )  $\delta$  7.36-7.31 (m, 2H), 7.26 – 7.22 (m, 3H), 6.56 (s, 1H), 4.56 (t,  $J = 8.5$  Hz, 1H), 4.51 (d,  $J = 0.9$  Hz, 2H), 4.47 (t,  $J = 8.5$  Hz, 1H), 2.36 – 2.22 (m, 2H), 1.49 (dt,  $J = 11.2$ , 7.5 Hz, 2H), 1.36 – 1.21 (m, 6H), 0.87 (t,  $J = 7.0$  Hz, 3H);  $^{13}\text{C}$  NMR (126 MHz,  $\text{CDCl}_3$ )  $\delta$  136.9, 136.9, 129.1, 128.7, 128.2, 126.9, 80.1 (dt,  $J = 182.2$ , 38.3 Hz), 67.6 (t,  $J = 6.2$  Hz), 31.5, 29.4, 28.5, 27.9, 22.6, 14.0;  $^{19}\text{F}$  NMR (471 MHz,  $\text{CDCl}_3$ )  $\delta$  -81.5 – -85.6 (m), -228.7 – -237.6 (m); HRMS (ESI+): Calculated for  $\text{C}_{17}\text{H}_{23}\text{F}_3\text{O}$ :  $[\text{M}+\text{H}]^+$  301.1774, Found 301.1774.

**(Z)-2-bromo-3-(1,1,2-trifluoroethoxy)prop-1-en-1-ylbenzene (3n)**

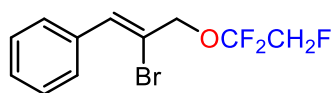

Obtained as a yellow liquid (35 mg, 60% yield).  $^1\text{H}$  NMR (500 MHz,  $\text{CDCl}_3$ )  $\delta$  7.46 (dd,  $J = 7.8$ , 1.6 Hz, 2H), 7.37 – 7.29 (m, 3H), 4.81 (s, 2H), 4.58 (t,  $J = 8.7$  Hz, 1H), 4.48 (t,  $J = 8.7$  Hz, 1H), 3.74 – 3.70 (m, 1H);  $^{13}\text{C}$  NMR (126 MHz,  $\text{CDCl}_3$ )  $\delta$  131.9, 128.9, 128.4, 120.0, 100.0, 87.2, 82.2, 79.8 (d,  $J = 182.7$  Hz), 52.6 (t,  $J = 8.2$  Hz);  $^{19}\text{F}$  NMR (471 MHz,  $\text{CDCl}_3$ )  $\delta$  -77.7 – -89.3 (m), -235.8; HRMS (ESI<sup>+</sup>): Calculated for  $\text{C}_{11}\text{H}_{10}\text{BrF}_3\text{O}$ :  $[\text{M}+\text{H}]^+$  294.9940, Found 294.9950.

## 4. Copies of NMR Spectra

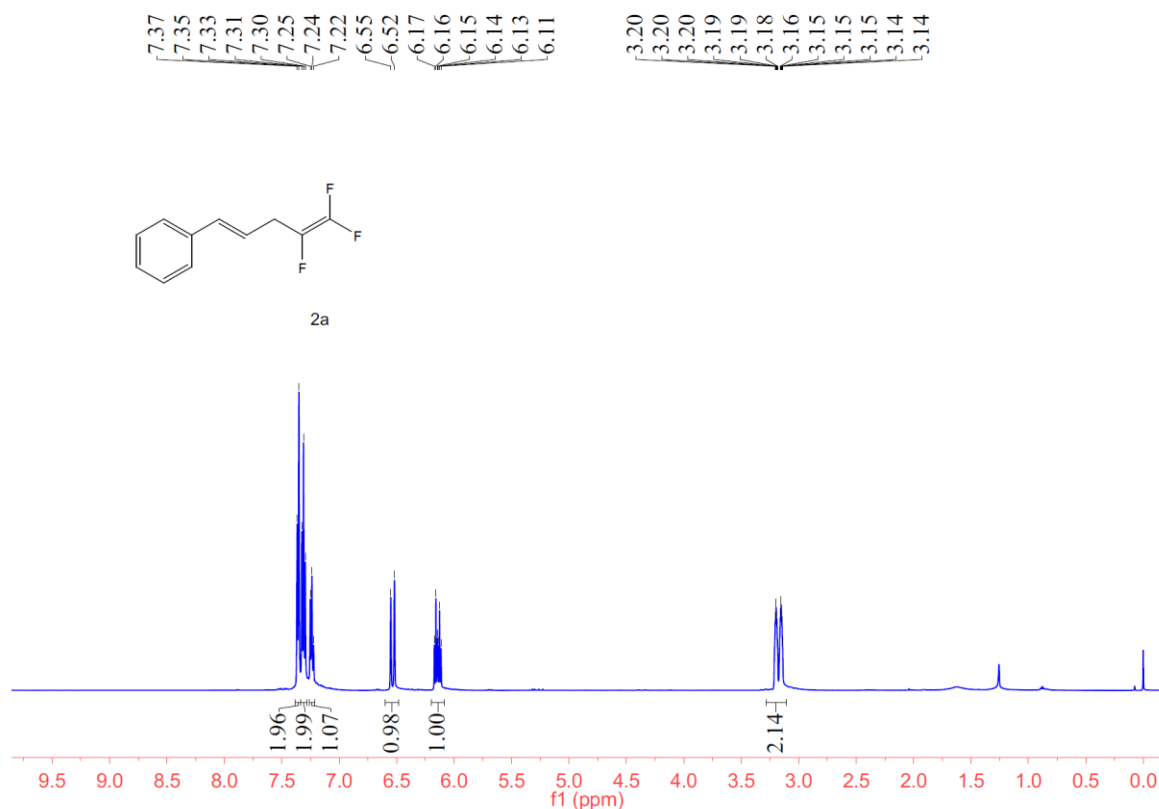

**<sup>1</sup>H NMR (CDCl<sub>3</sub>, 500 MHz) Spectrum of Compound 2a**

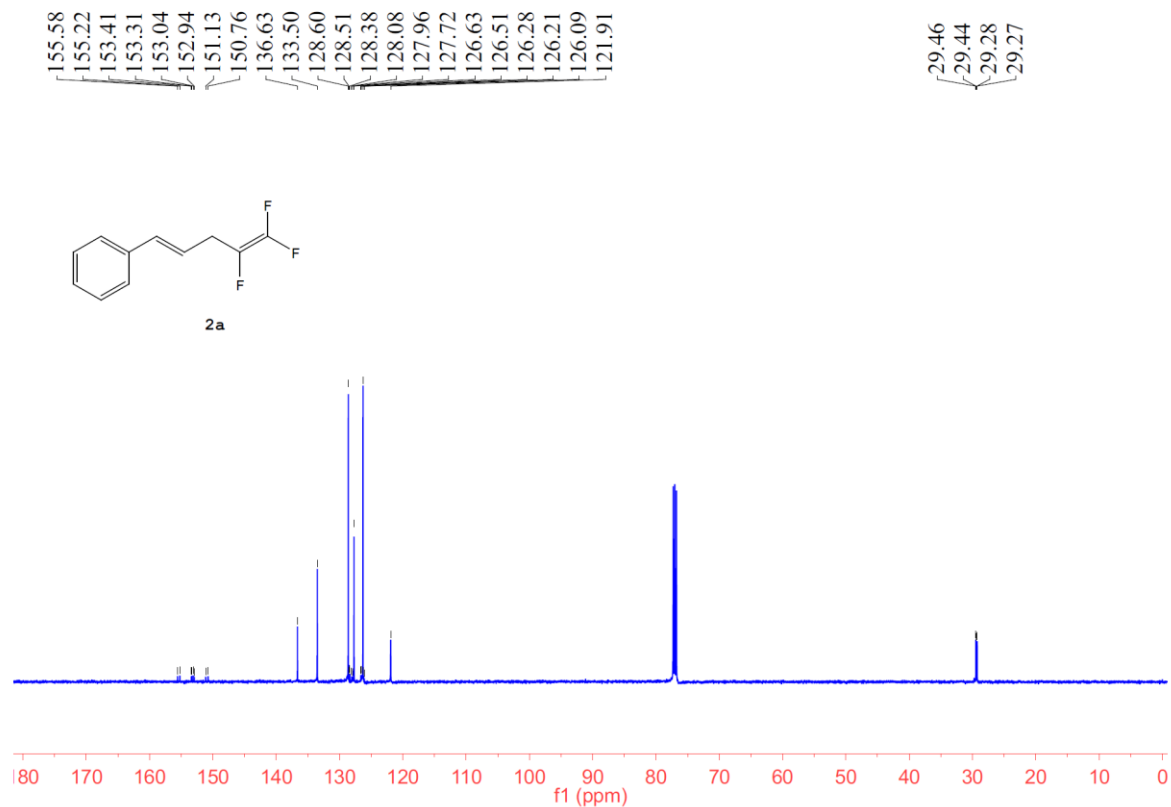

**<sup>13</sup>C NMR (CDCl<sub>3</sub>, 126 MHz) Spectrum of Compound 2a**



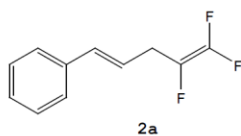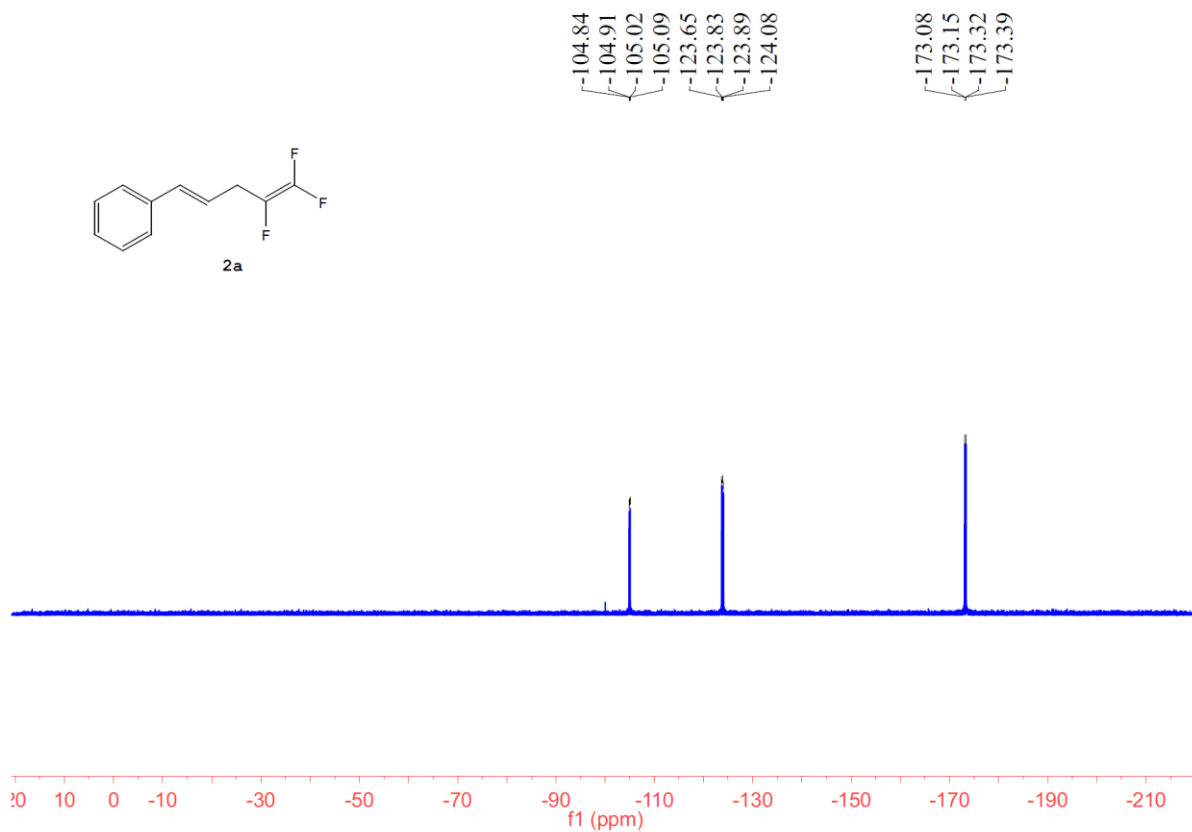

<sup>19</sup>F NMR (CDCl<sub>3</sub>, 471 MHz) Spectrum of Compound 2a

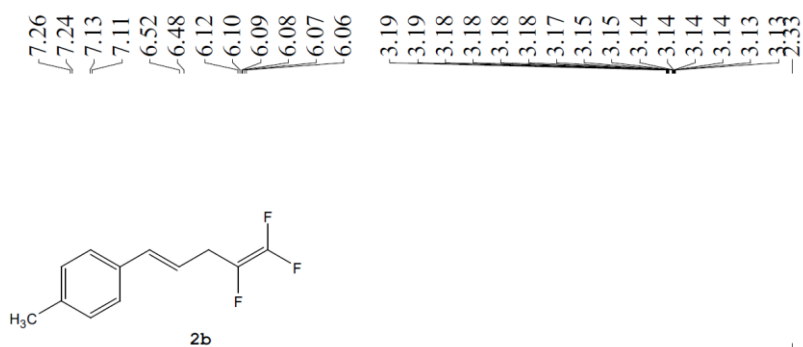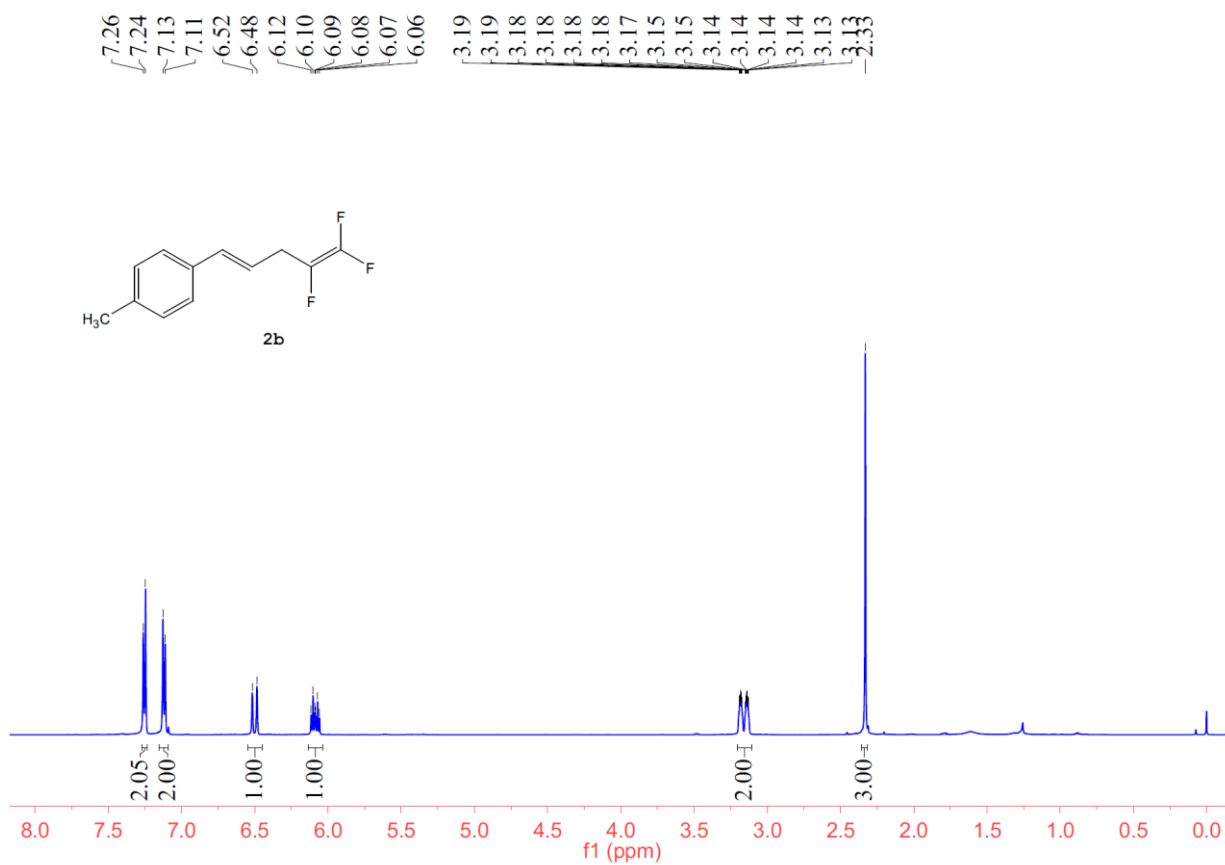

<sup>1</sup>H NMR (CDCl<sub>3</sub>, 500 MHz) Spectrum of Compound 2b

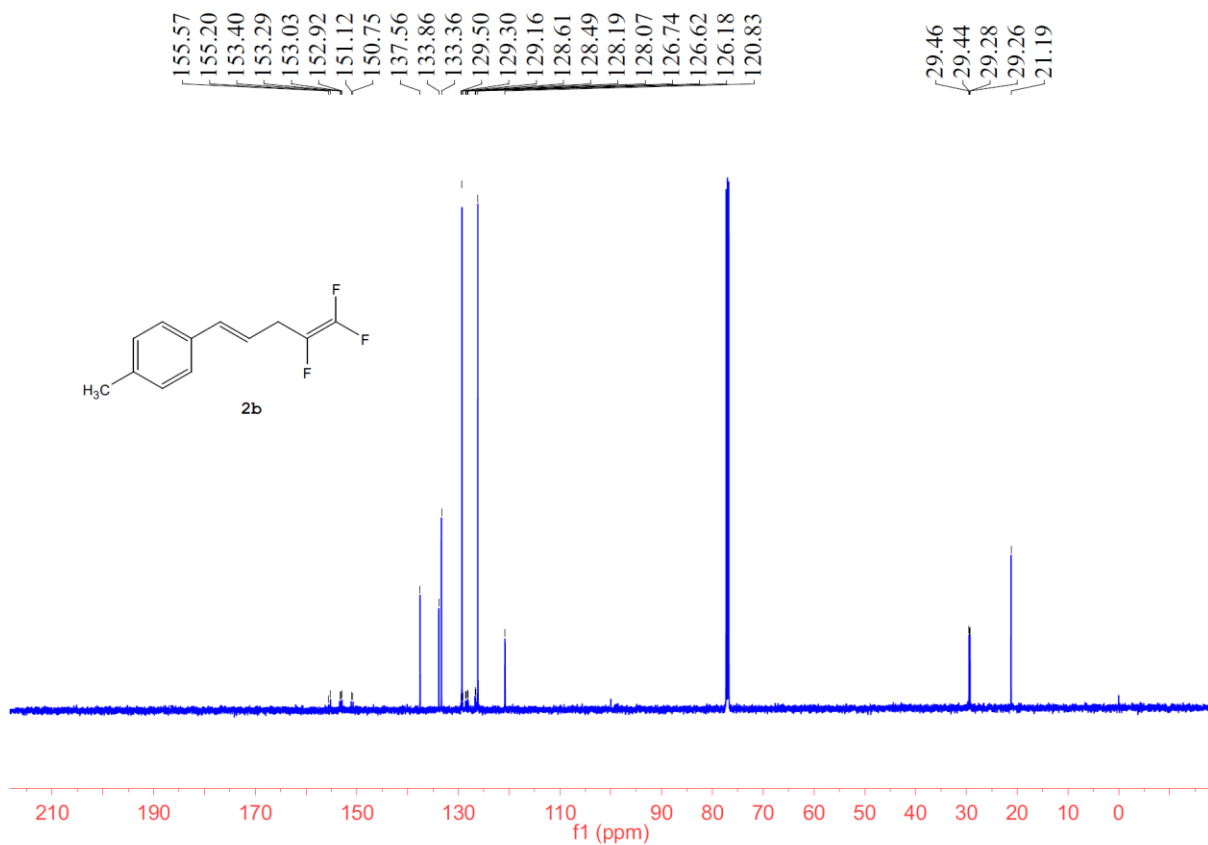

<sup>13</sup>C NMR (CDCl<sub>3</sub>, 126 MHz) Spectrum of Compound 2b

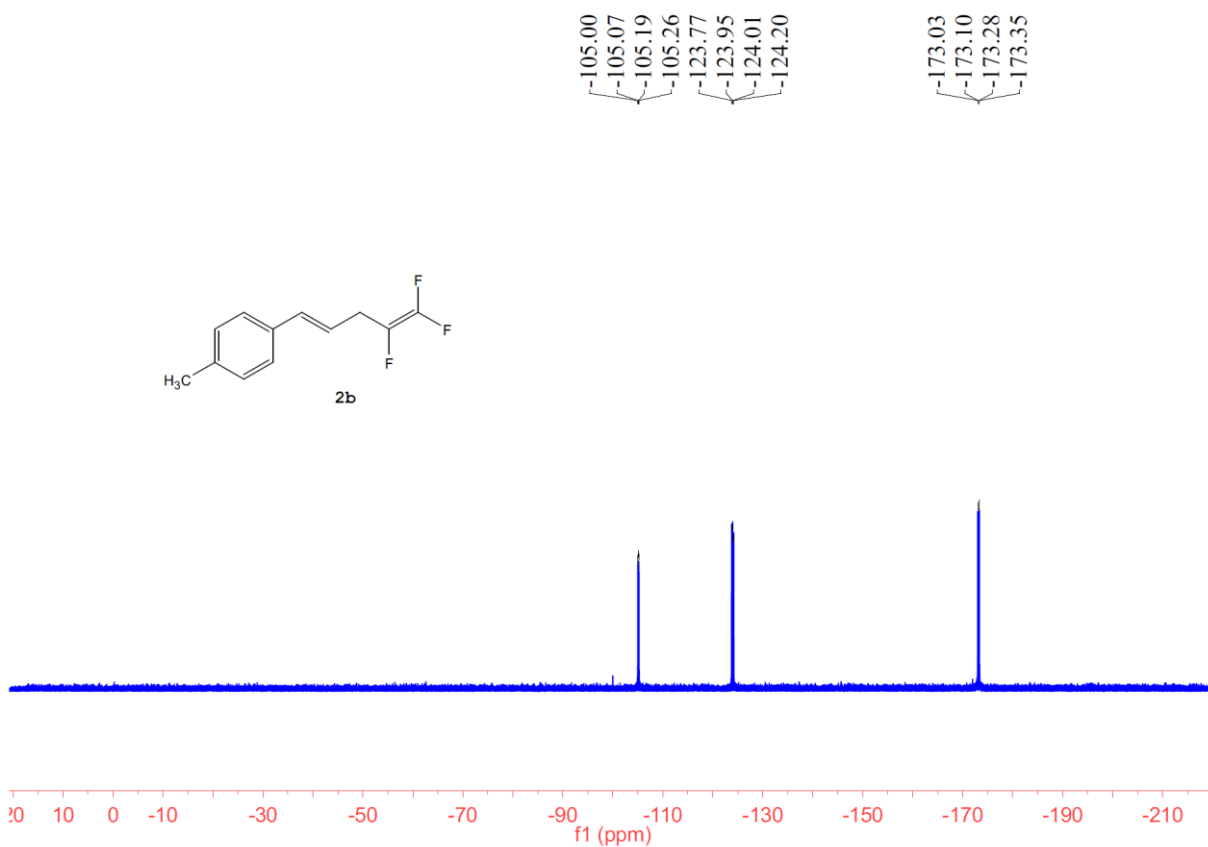

<sup>19</sup>F NMR (CDCl<sub>3</sub>, 471 MHz) Spectrum of Compound 2b

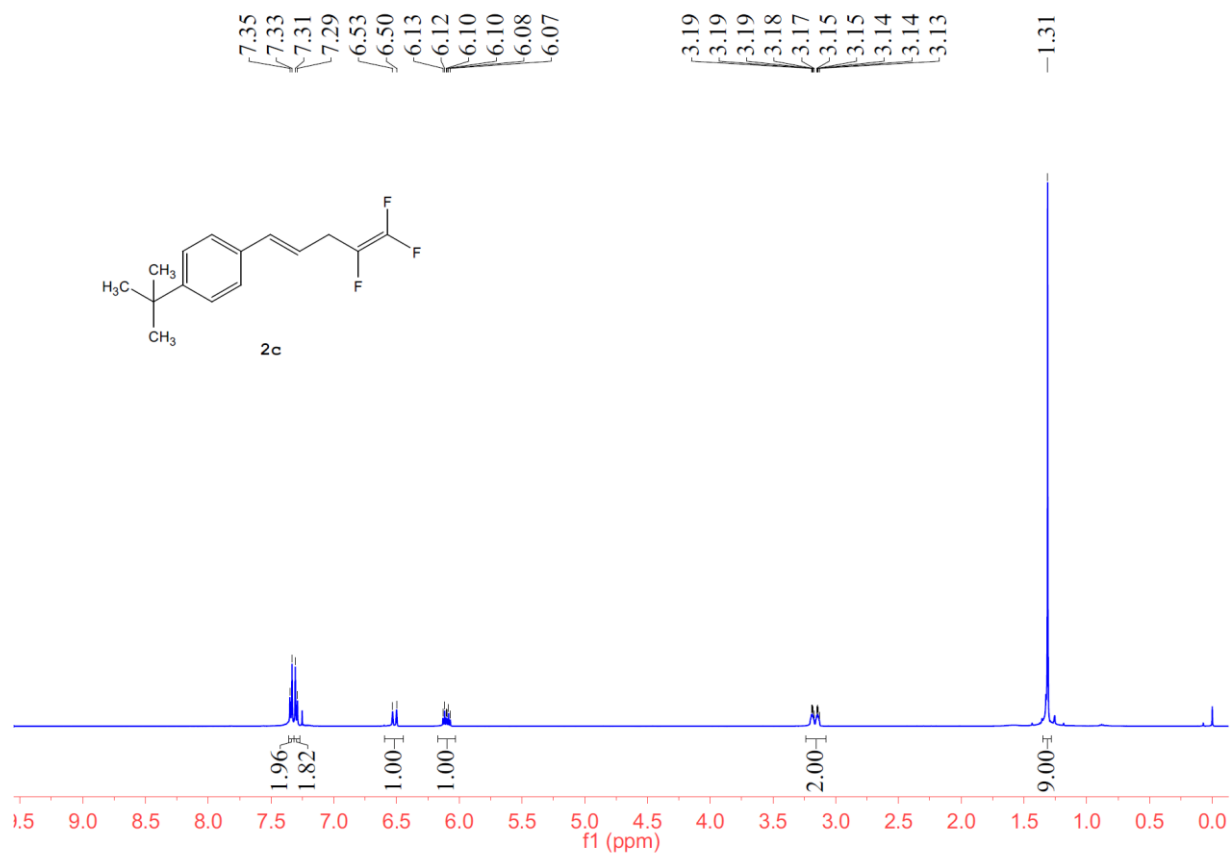

**<sup>1</sup>H NMR (CDCl<sub>3</sub>, 500 MHz) Spectrum of Compound 2c**

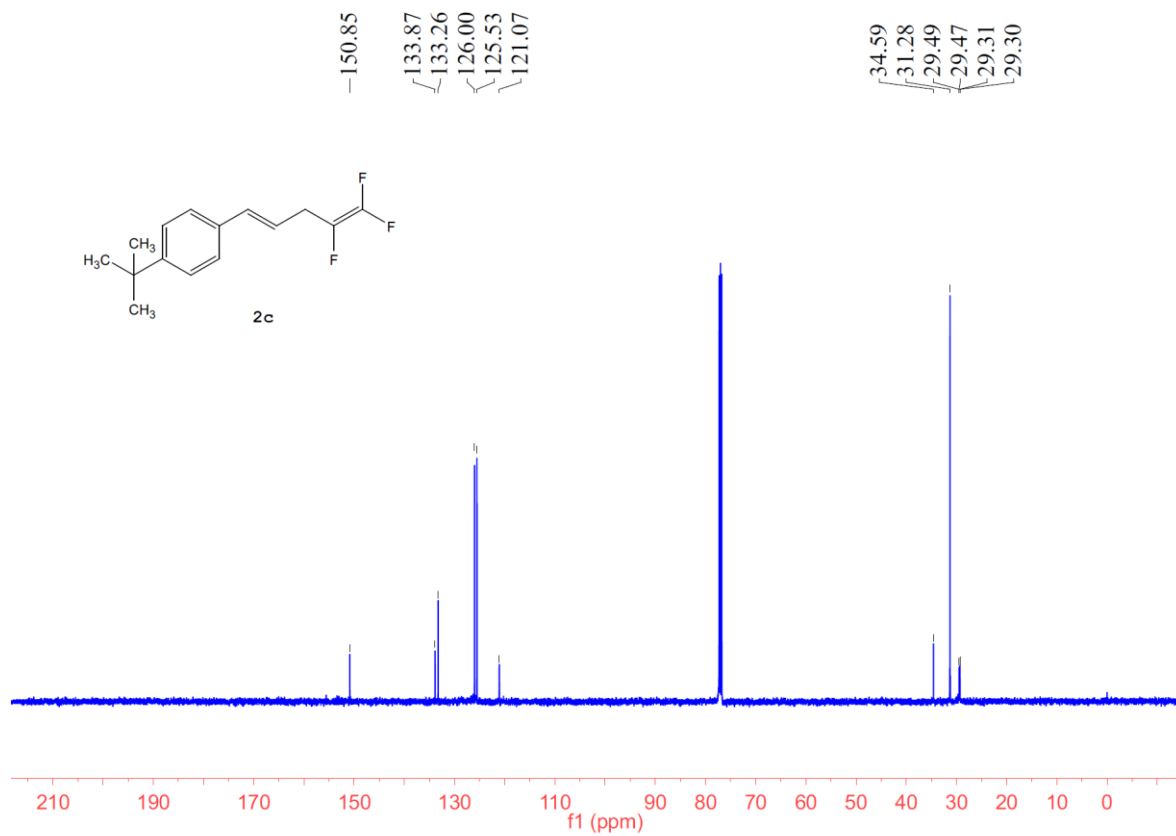

**<sup>13</sup>C NMR (CDCl<sub>3</sub>, 126 MHz) Spectrum of Compound 2c**

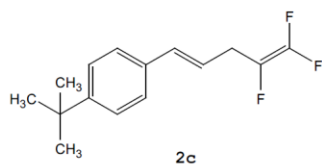

-104.96  
-105.03  
-105.14  
-105.21  
-123.74  
-123.93  
-123.99  
-124.17

-173.06  
-173.13  
-173.30  
-173.37

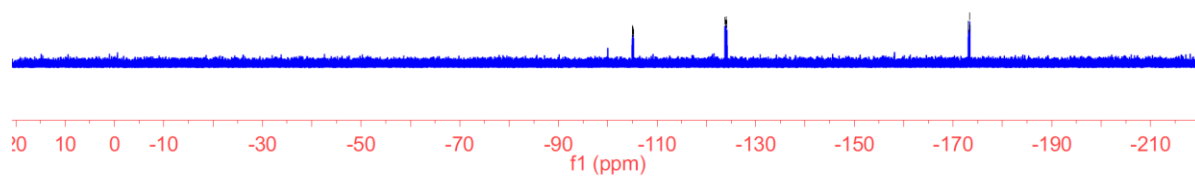

**<sup>19</sup>F NMR (CDCl<sub>3</sub>, 471 MHz) Spectrum of Compound 2c**

7.22  
7.22  
7.21  
7.20  
7.20  
7.19  
6.77  
6.77  
6.76  
5.96  
5.93  
5.92  
5.91  
5.90  
5.89

-3.71  
-3.10  
-3.10  
-3.09  
-3.09  
-3.08  
-3.08  
-3.05  
-3.05  
-3.04  
-3.04

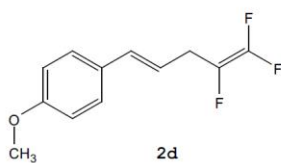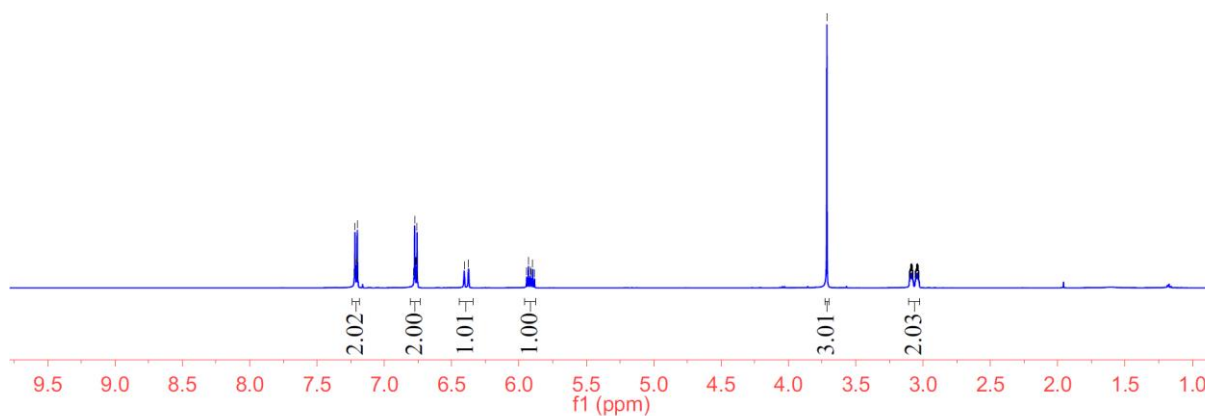

**<sup>1</sup>H NMR (CDCl<sub>3</sub>, 500 MHz) Spectrum of Compound 2d**

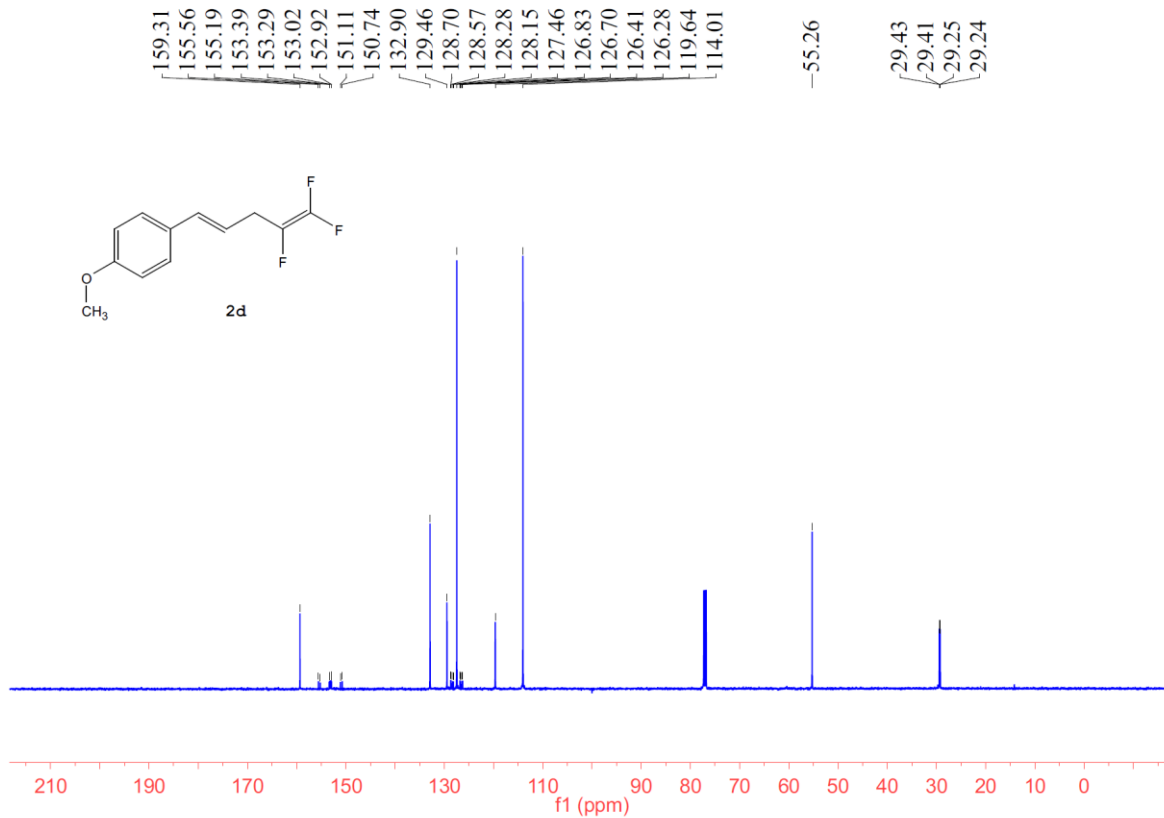

**<sup>13</sup>C NMR (CDCl<sub>3</sub>, 126 MHz) Spectrum of Compound 2d**

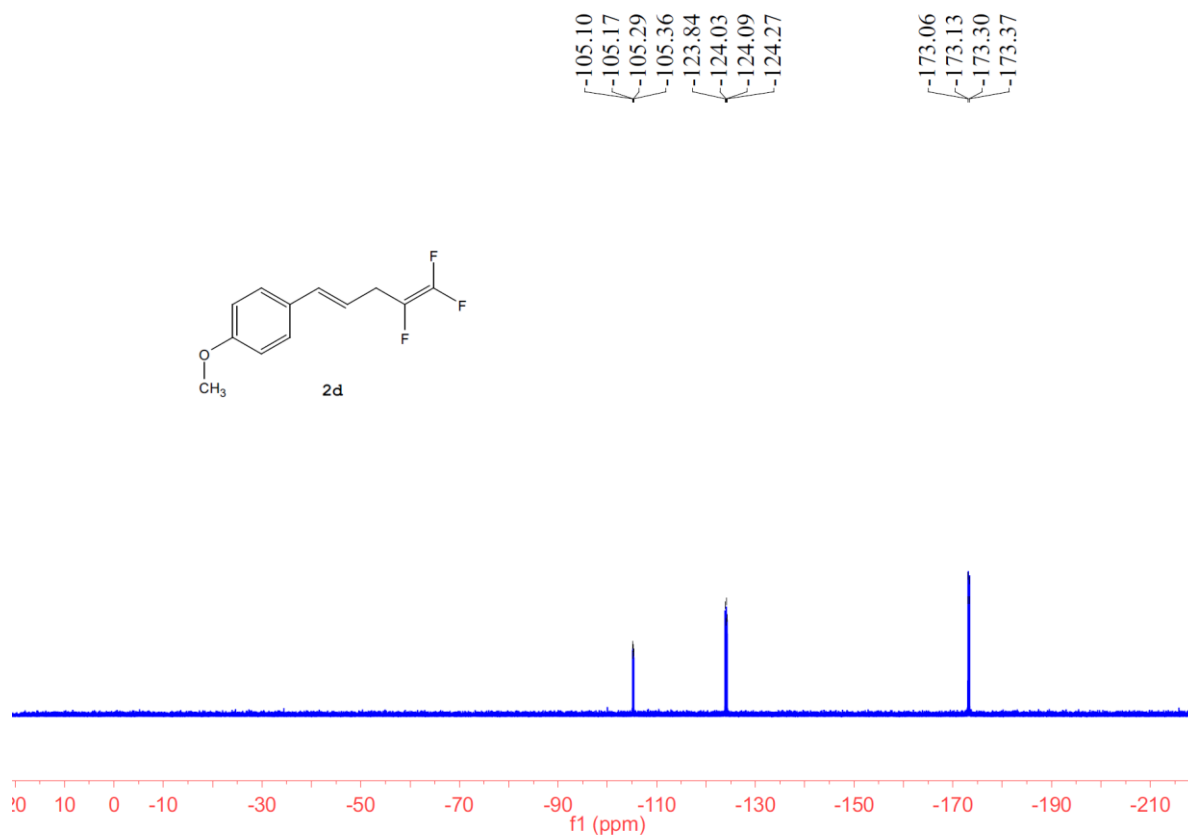

**<sup>19</sup>F NMR (CDCl<sub>3</sub>, 471 MHz) Spectrum of Compound 2d**

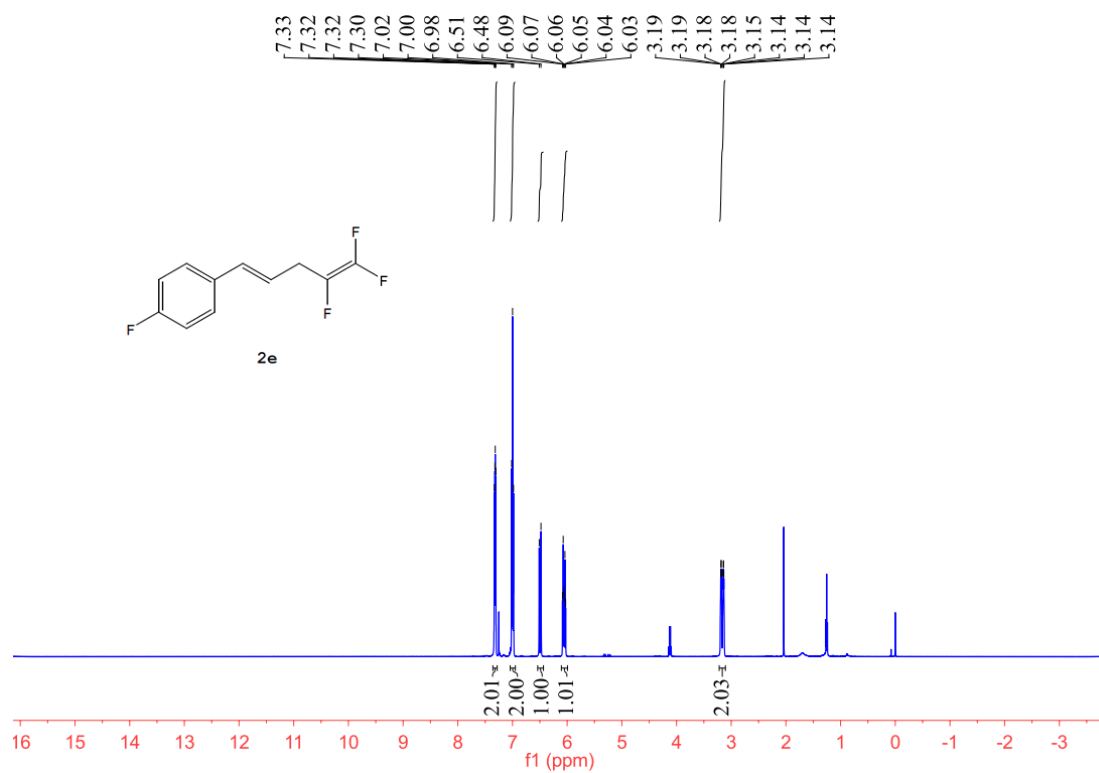

<sup>1</sup>H NMR (CDCl<sub>3</sub>, 500 MHz) Spectrum of Compound 2e

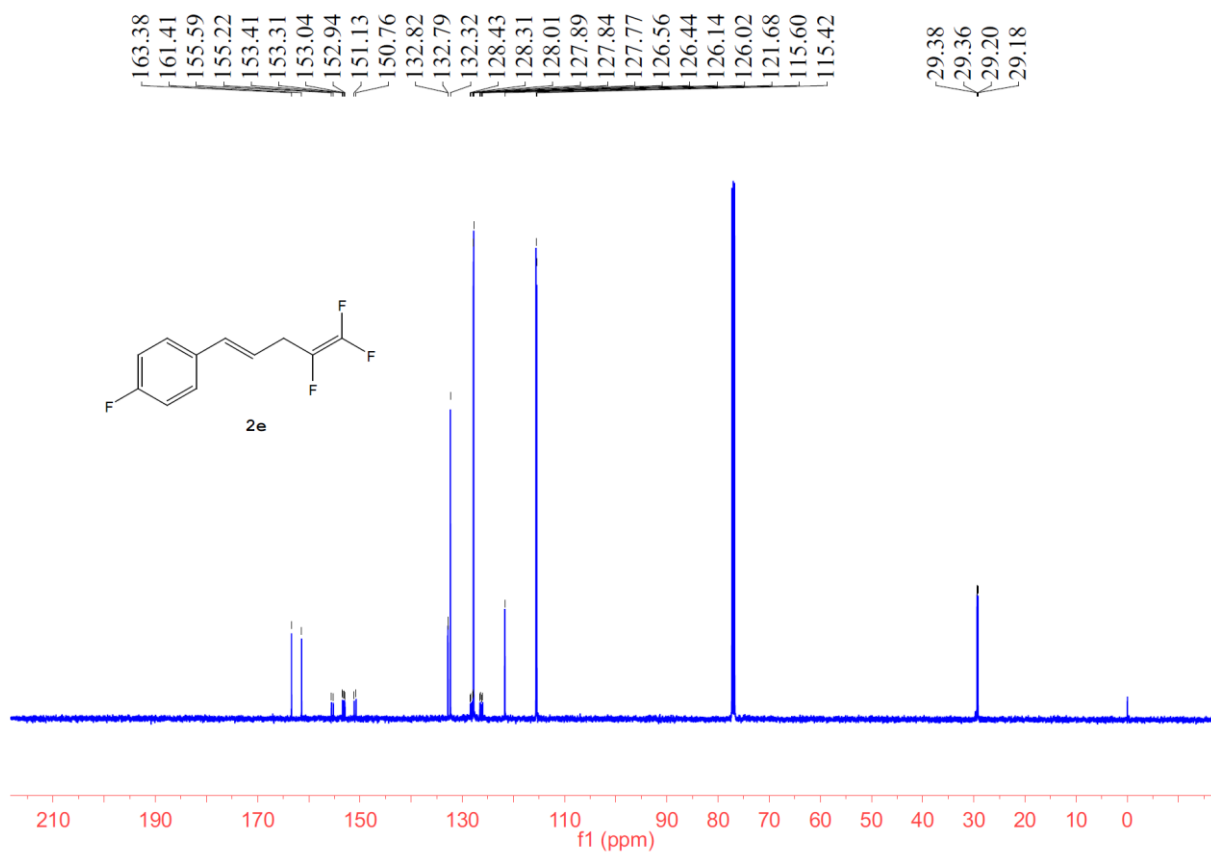

<sup>13</sup>C NMR (CDCl<sub>3</sub>, 126 MHz) Spectrum of Compound 2e

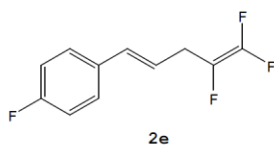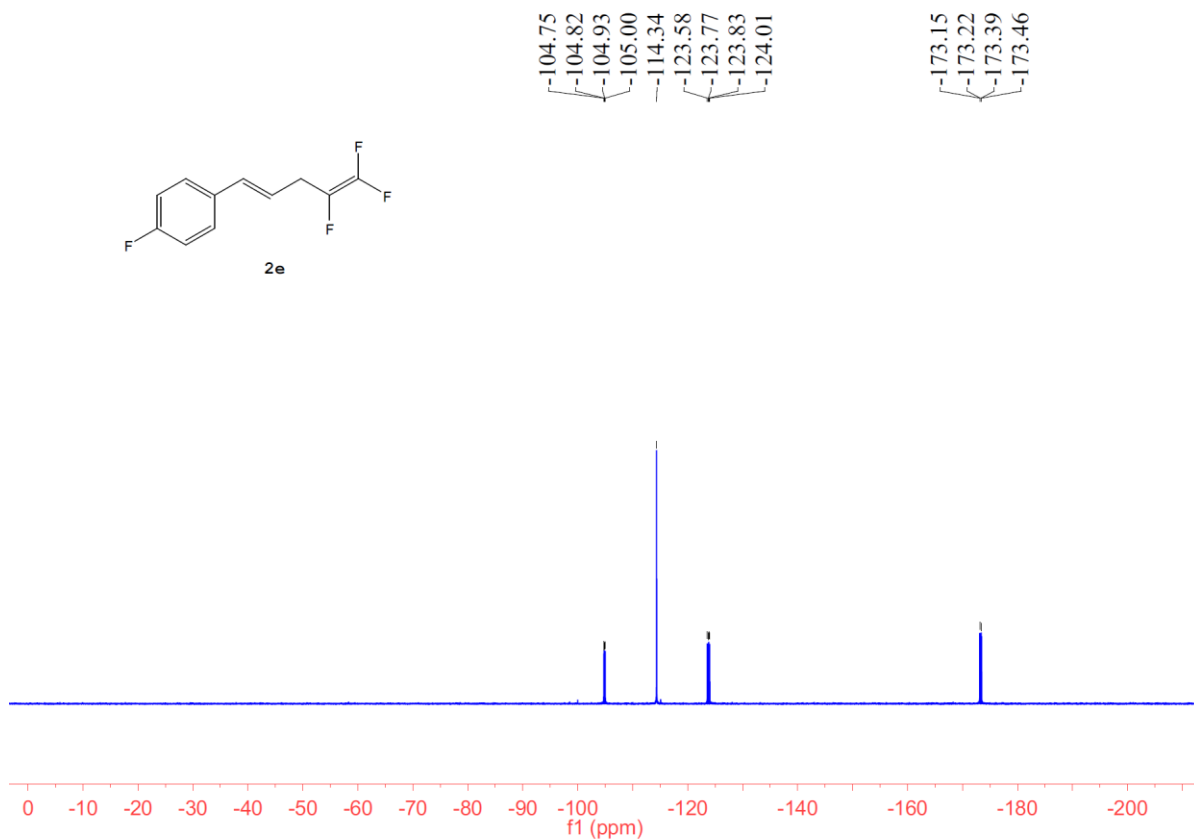

<sup>19</sup>F NMR (CDCl<sub>3</sub>, 471 MHz) Spectrum of Compound 2e

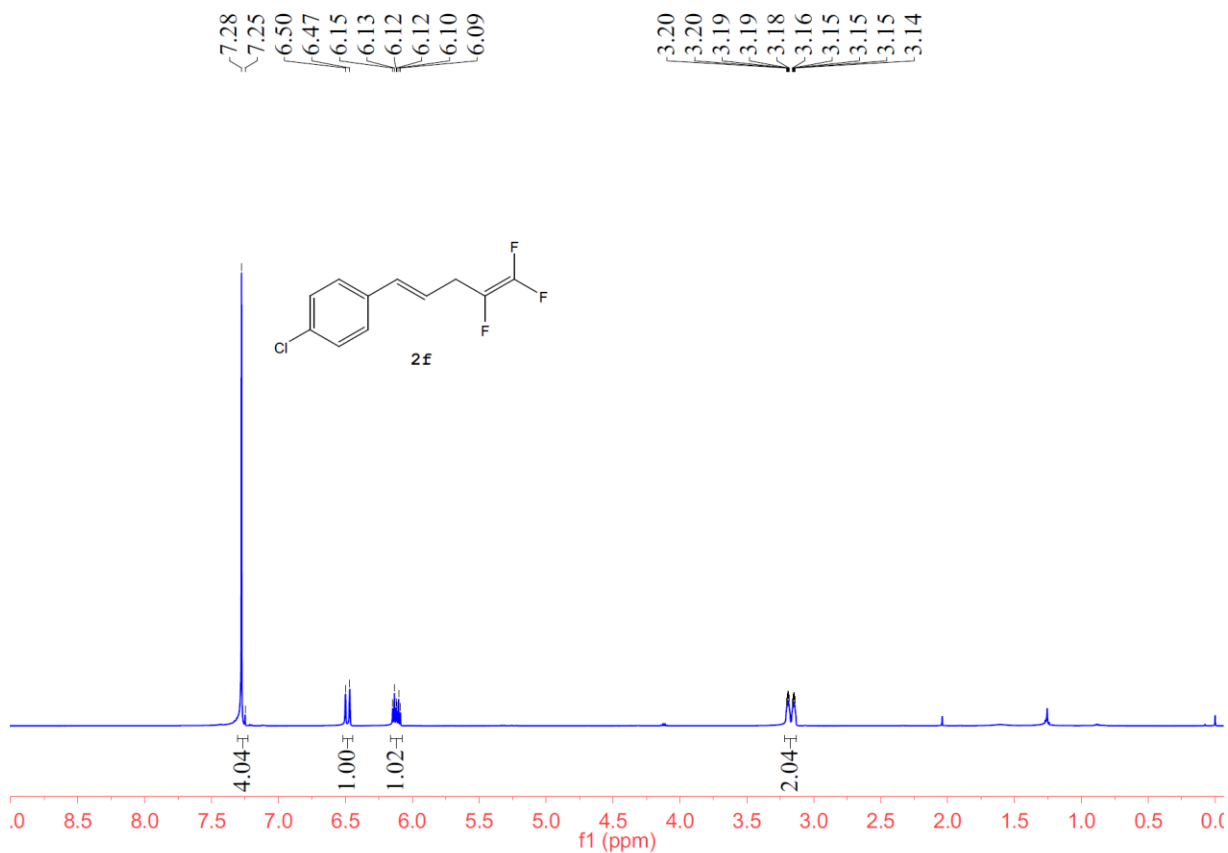

<sup>1</sup>H NMR (CDCl<sub>3</sub>, 500 MHz) Spectrum of Compound 2f

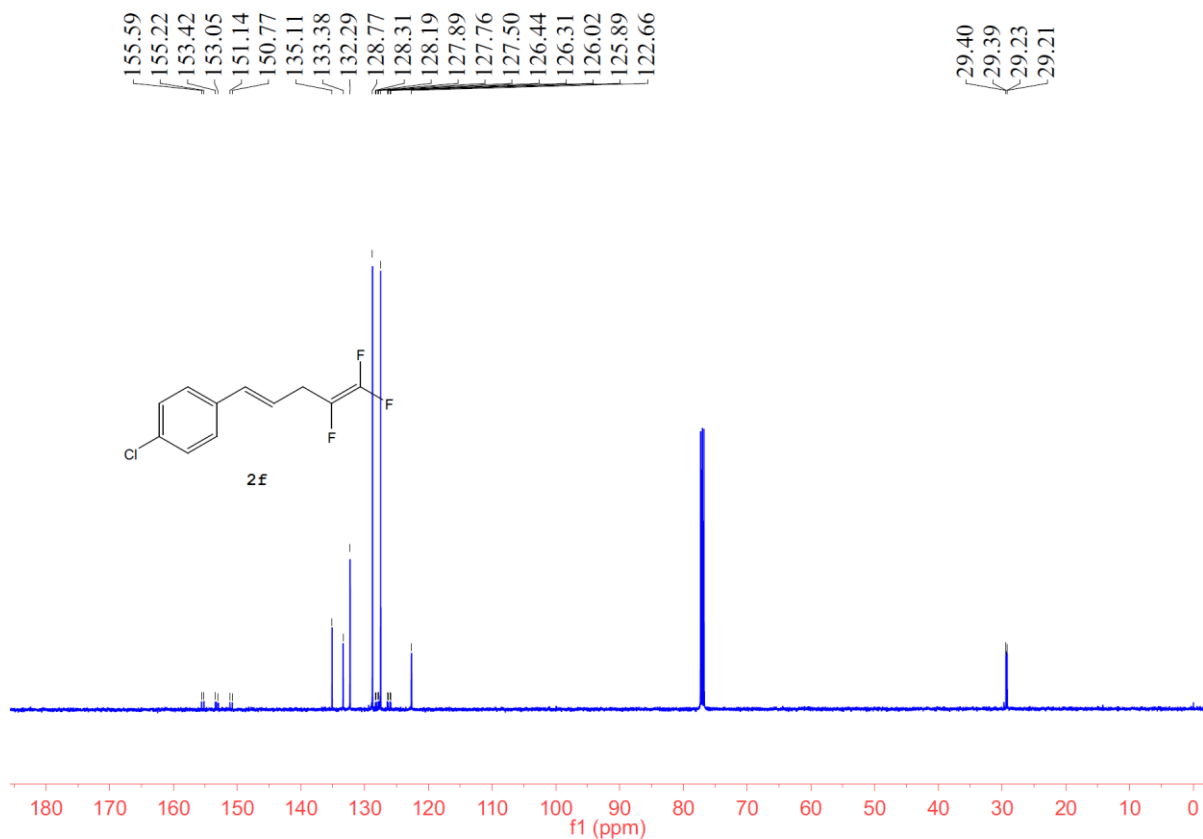

**$^{13}\text{C}$  NMR ( $\text{CDCl}_3$ , 126 MHz) Spectrum of Compound 2f**

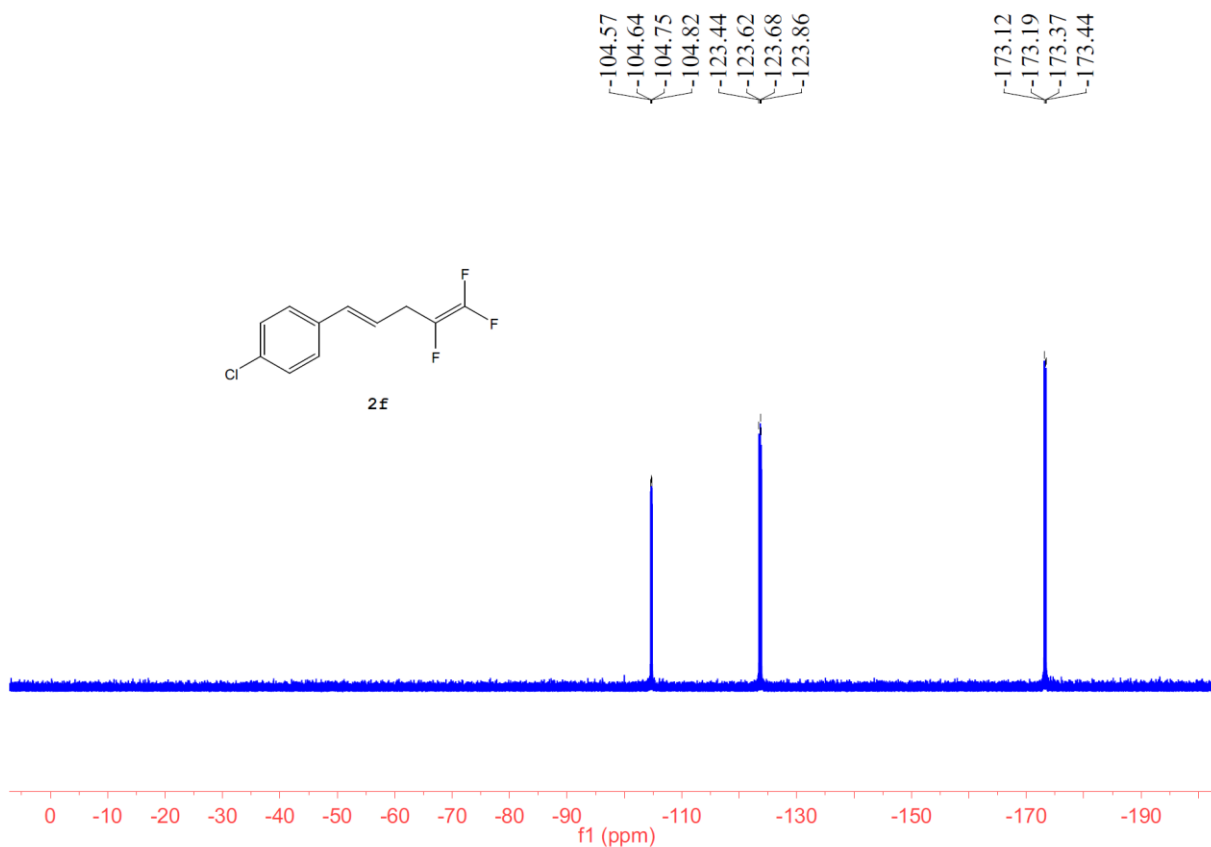

**$^{19}\text{F}$  NMR ( $\text{CDCl}_3$ , 471 MHz) Spectrum of Compound 2f**



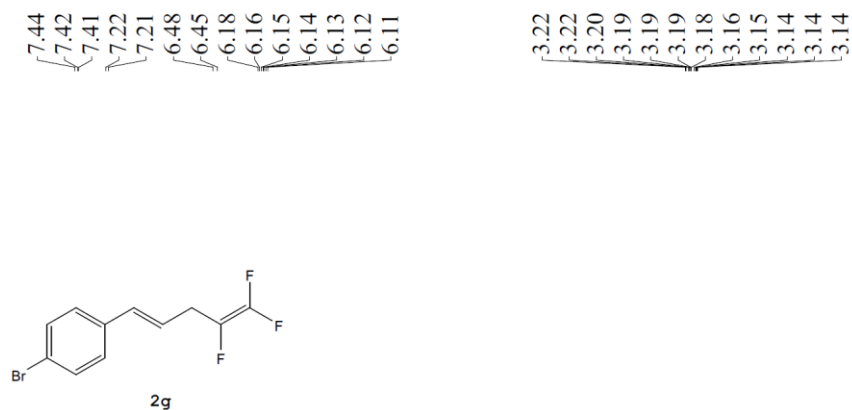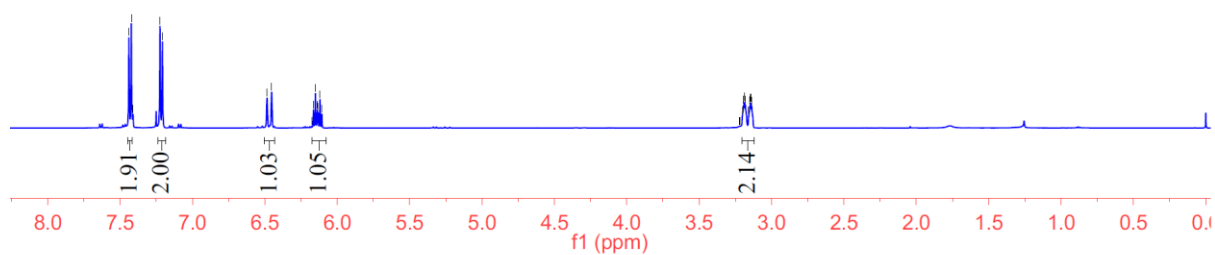

**<sup>1</sup>H NMR (CDCl<sub>3</sub>, 500 MHz) Spectrum of Compound 2g**

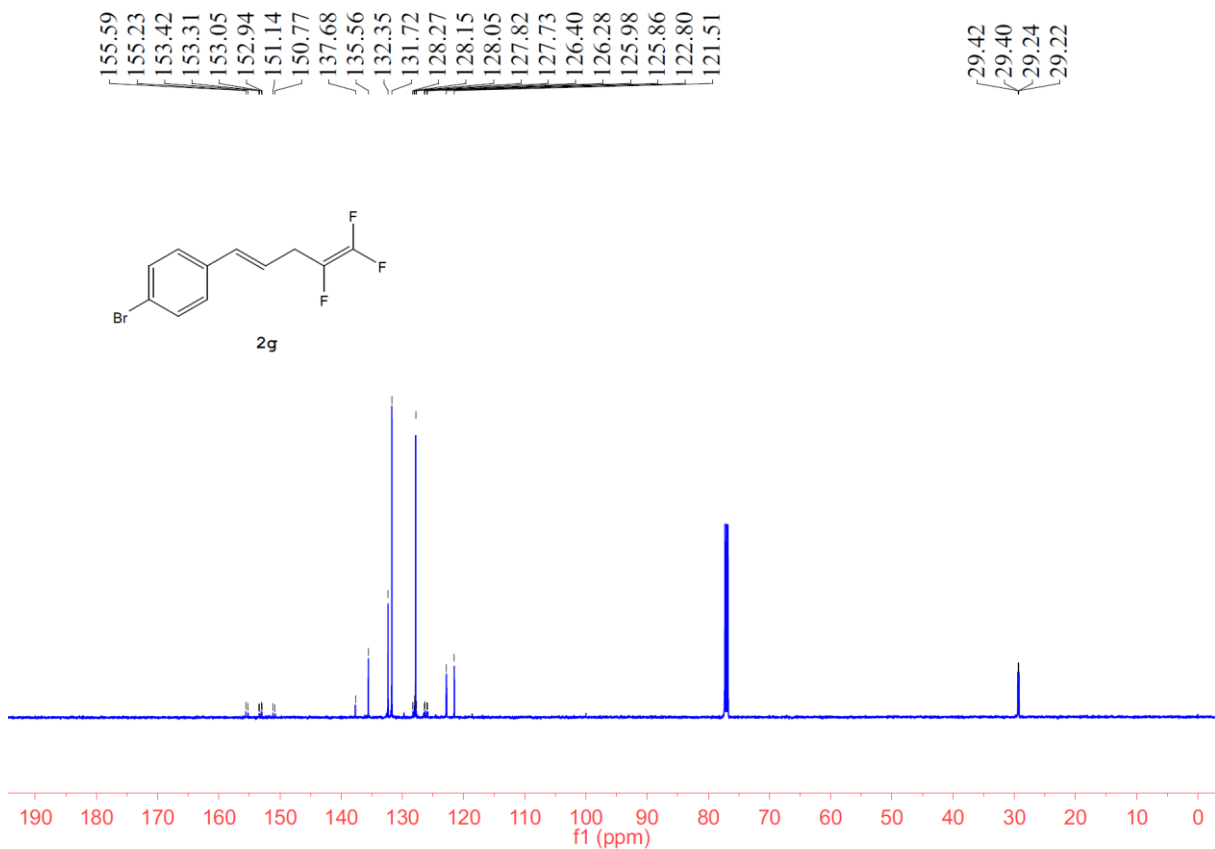

**<sup>13</sup>C NMR (CDCl<sub>3</sub>, 126 MHz) Spectrum of Compound 2g**

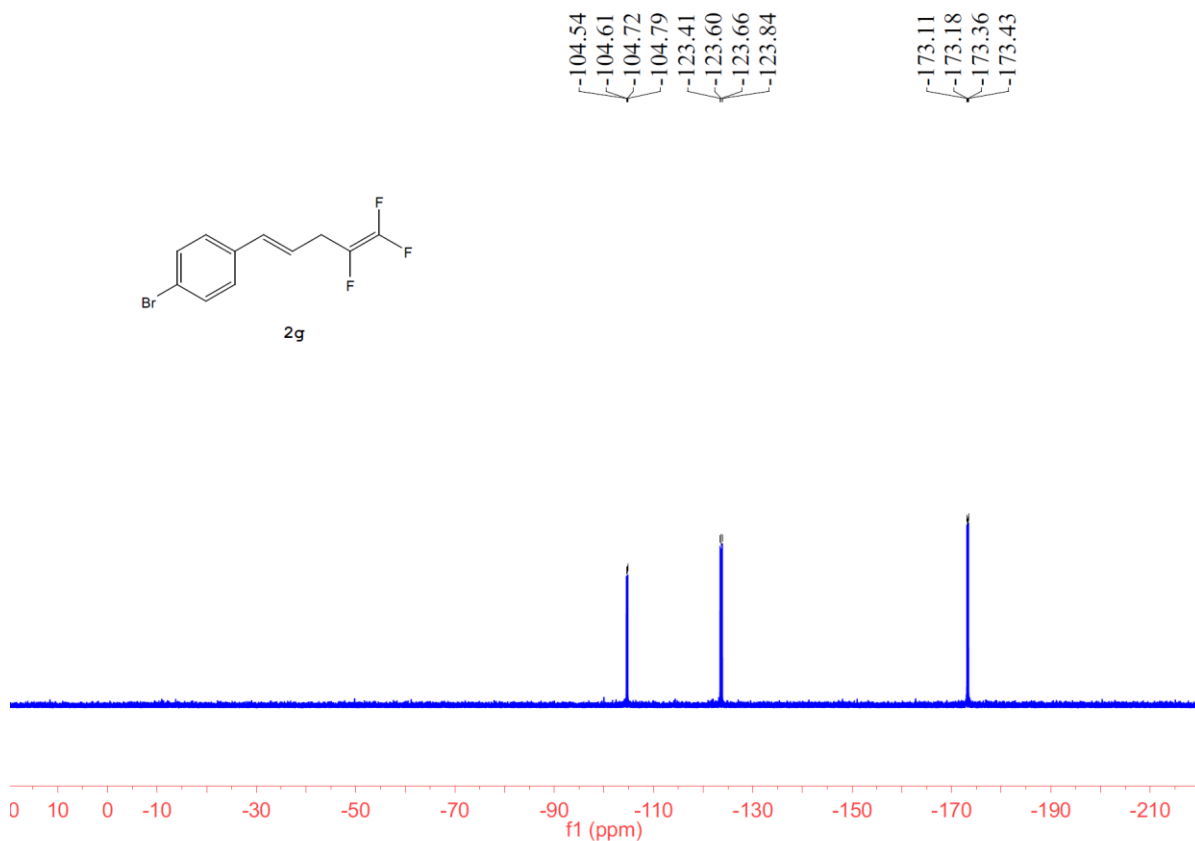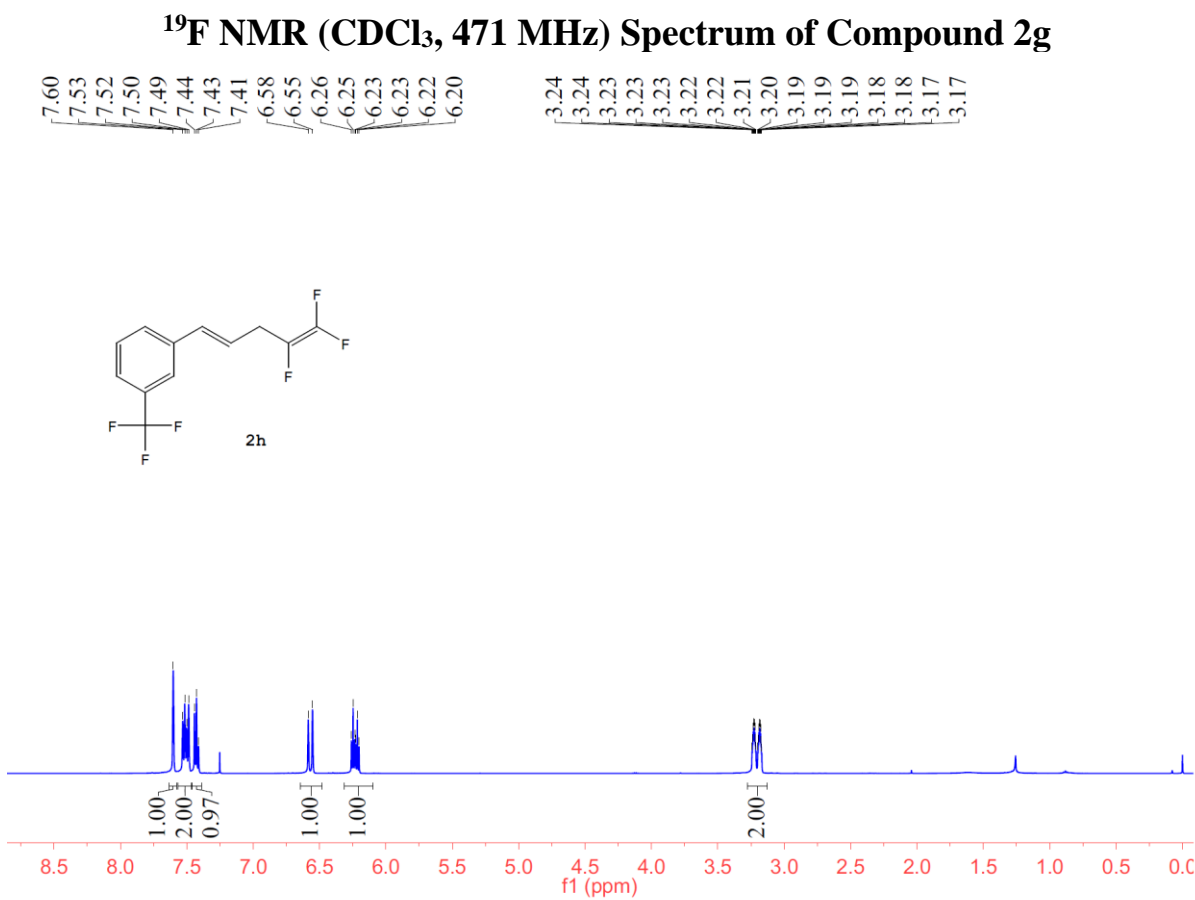

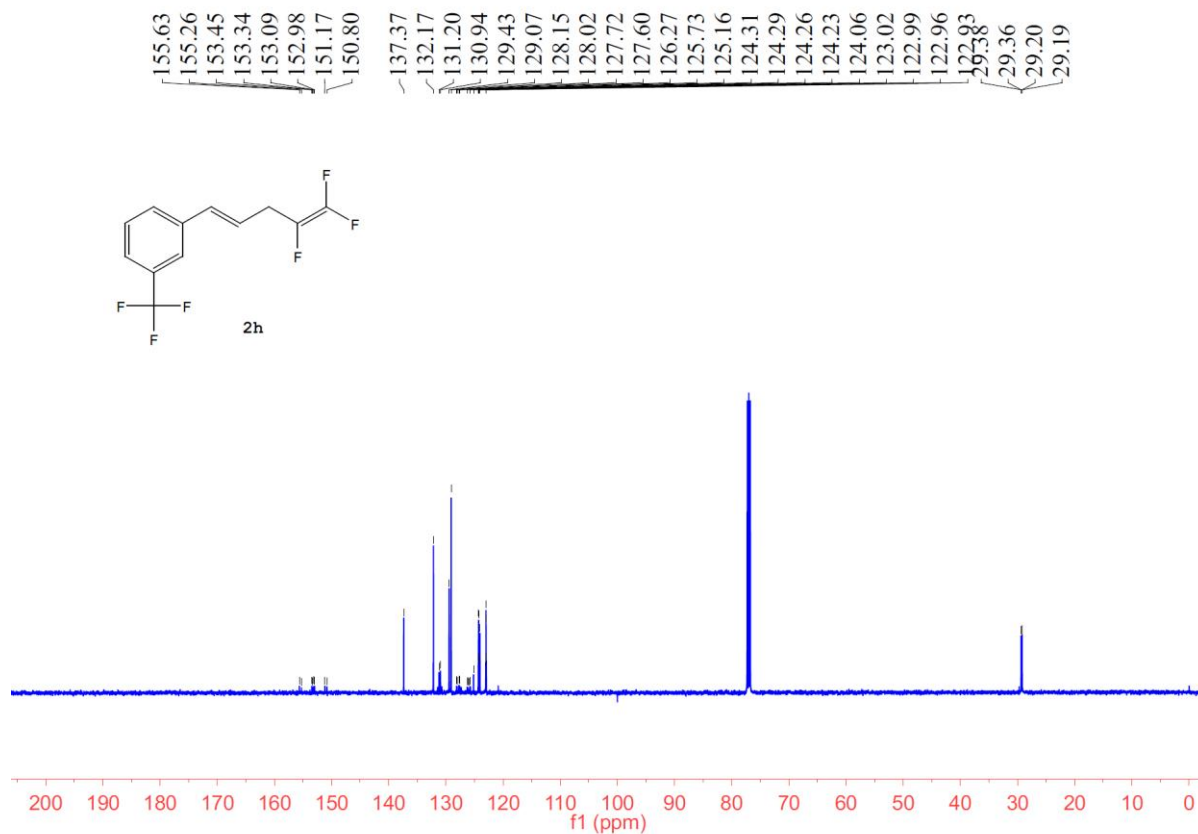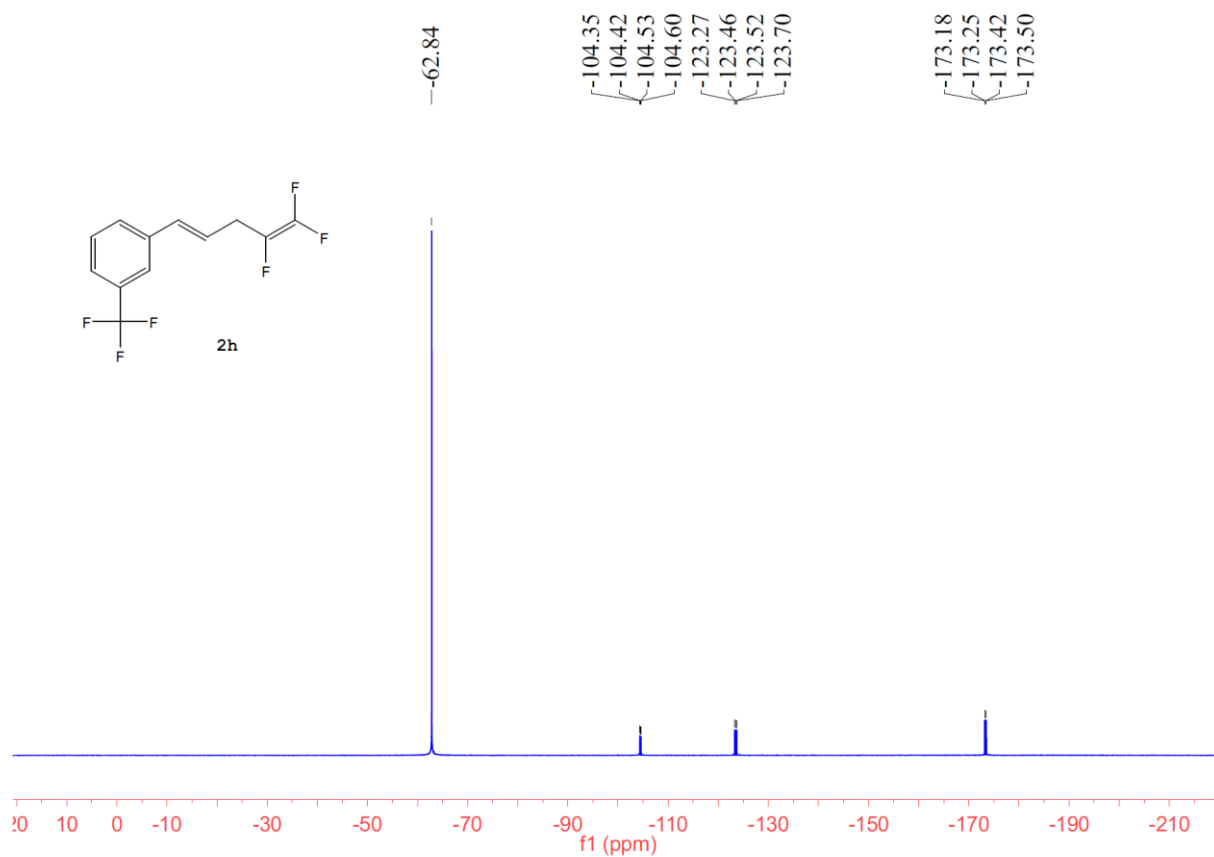

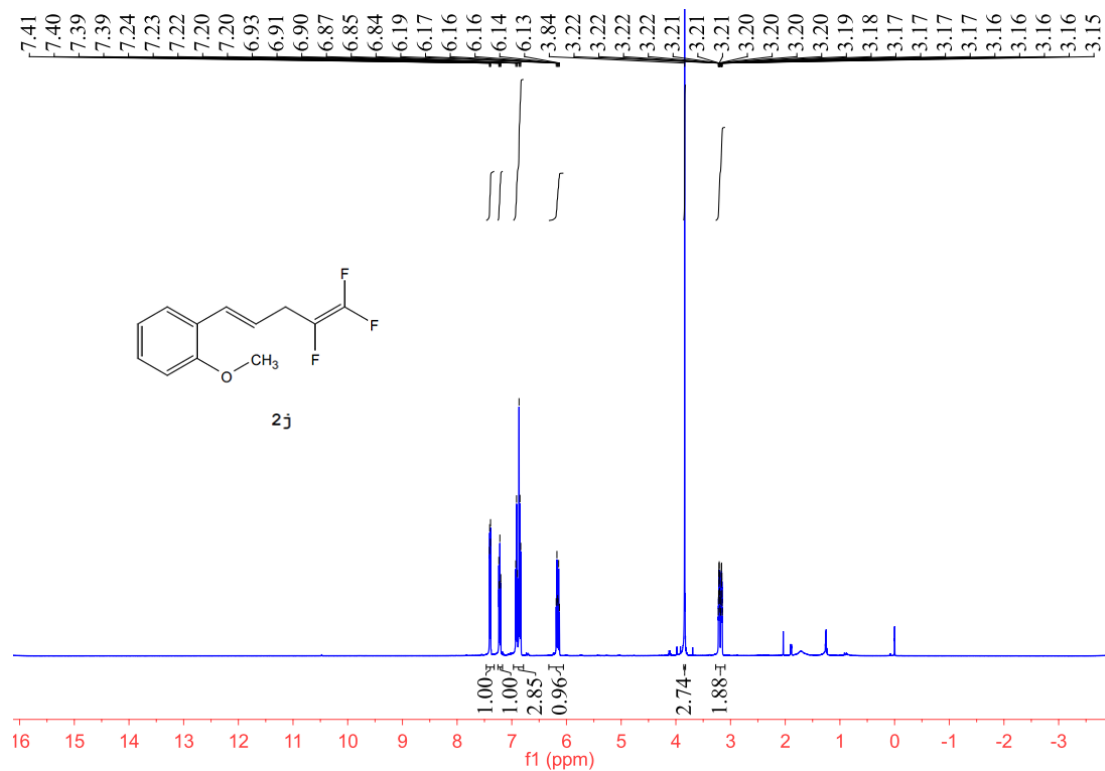

<sup>1</sup>H NMR (CDCl<sub>3</sub>, 500 MHz) Spectrum of Compound 2j

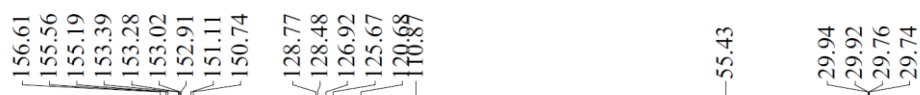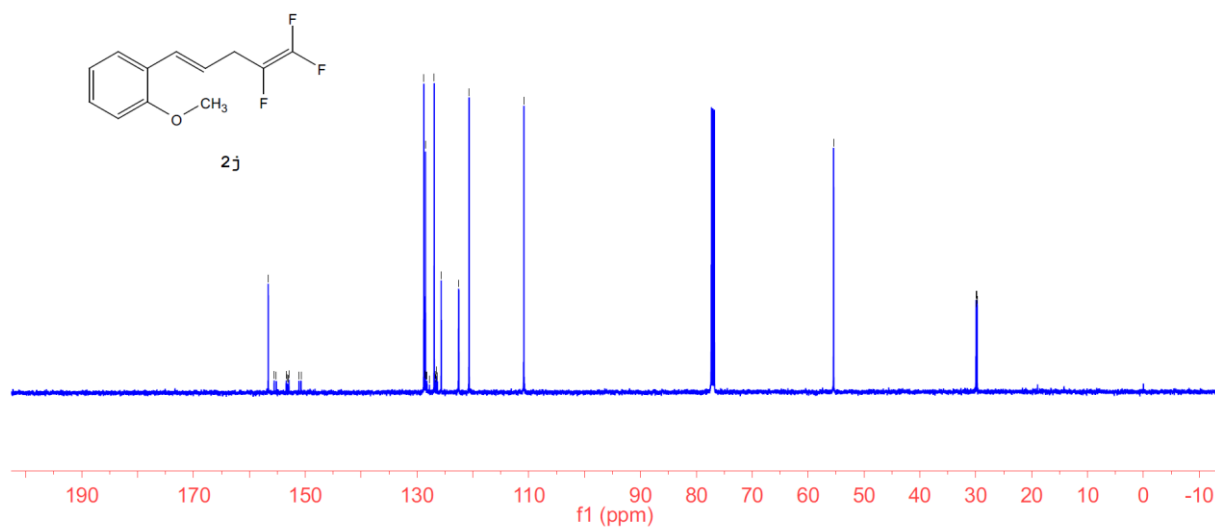

<sup>13</sup>C NMR (CDCl<sub>3</sub>, 126 MHz) Spectrum of Compound 2j

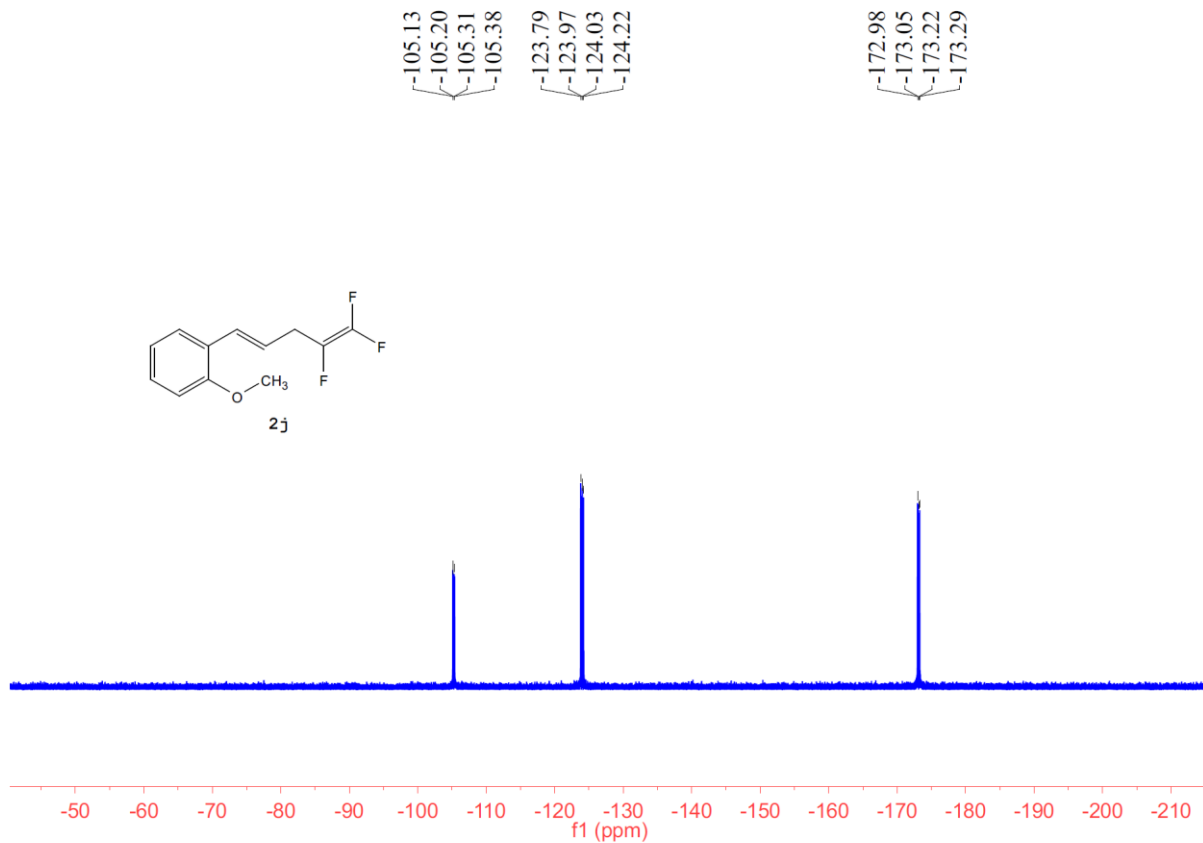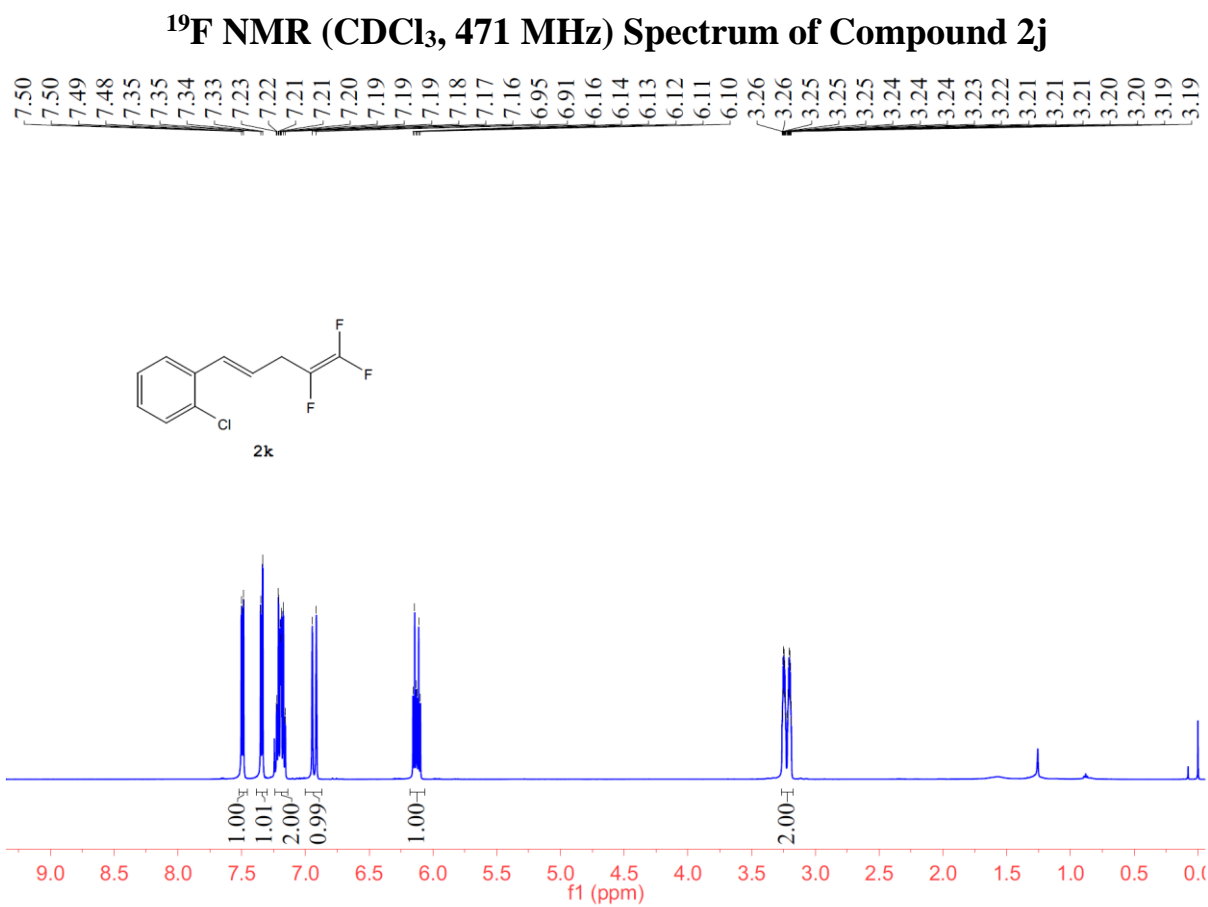

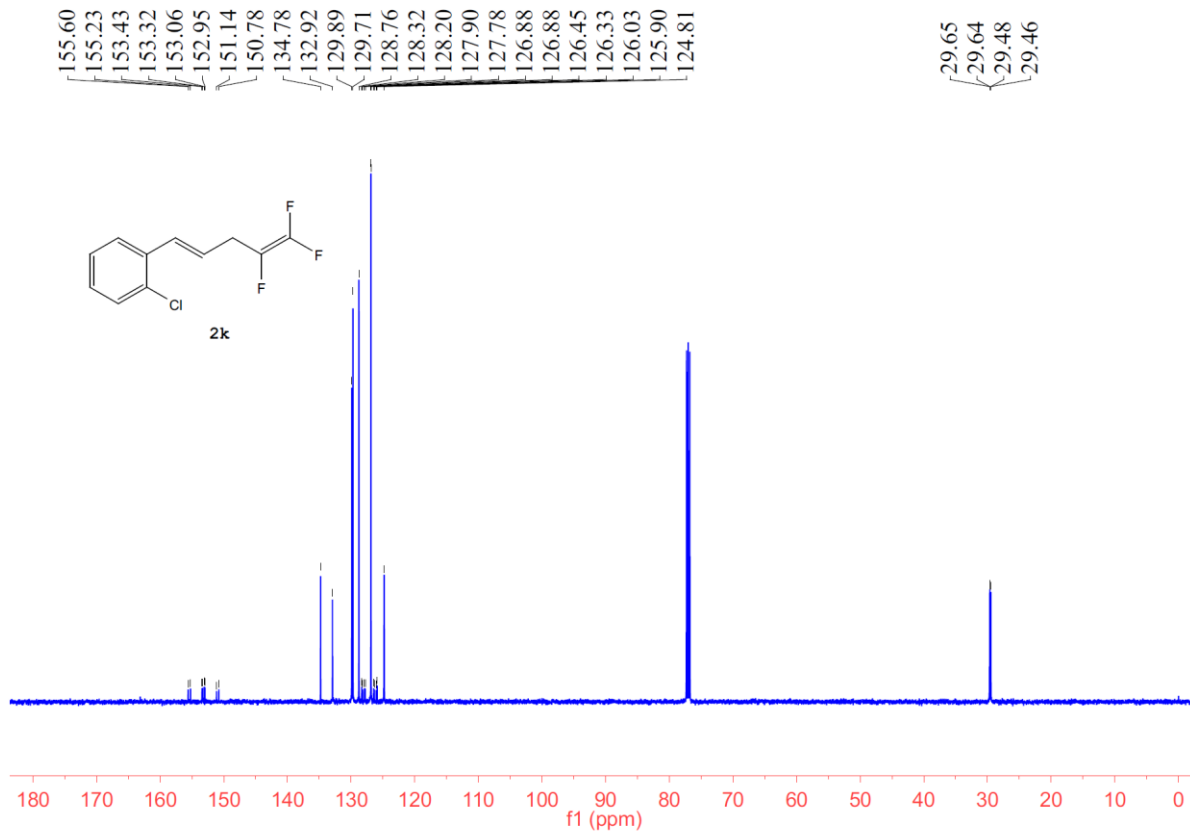

<sup>13</sup>C NMR (CDCl<sub>3</sub>, 126 MHz) Spectrum of Compound 2k

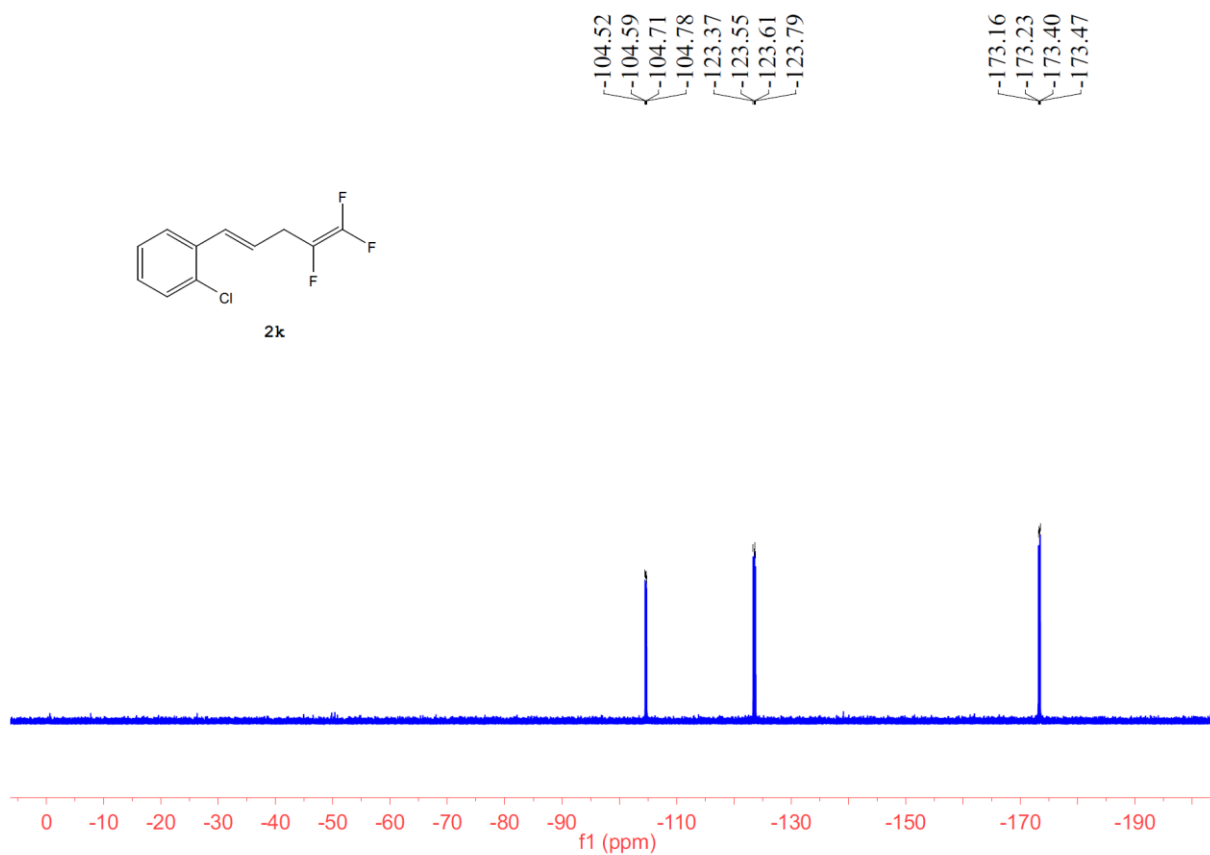

<sup>19</sup>F NMR (CDCl<sub>3</sub>, 471 MHz) Spectrum of Compound 2k

7.44  
7.44  
7.43  
7.42  
7.23  
7.23  
7.22  
7.21  
7.21  
7.20  
6.49  
6.45  
6.16  
6.15  
6.14  
6.13  
6.12  
6.11  
3.20  
3.20  
3.20  
3.19  
3.19  
3.19  
3.18  
3.18  
3.18  
3.17  
3.16  
3.16  
3.15  
3.15  
3.15  
3.14  
3.14  
3.13  
3.13  
3.13

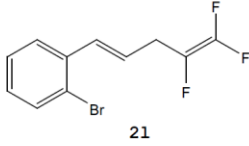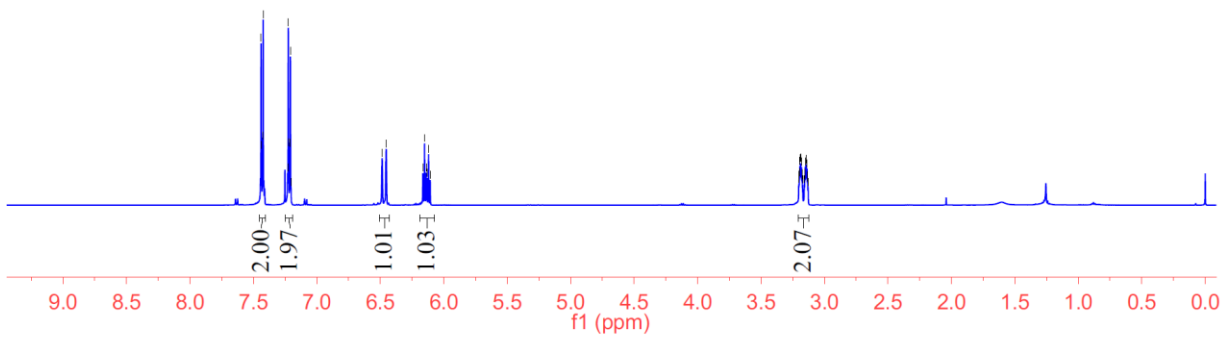

**<sup>1</sup>H NMR (CDCl<sub>3</sub>, 500 MHz) Spectrum of Compound 21**

155.59  
155.22  
153.42  
153.31  
153.05  
152.94  
151.13  
150.77  
137.68  
135.55  
132.34  
131.72  
128.27  
128.14  
128.05  
127.82  
127.72  
126.40  
126.27  
125.98  
125.85  
122.80  
121.51

29.42  
29.40  
29.24  
29.22

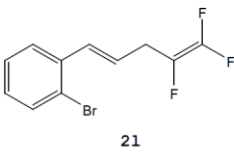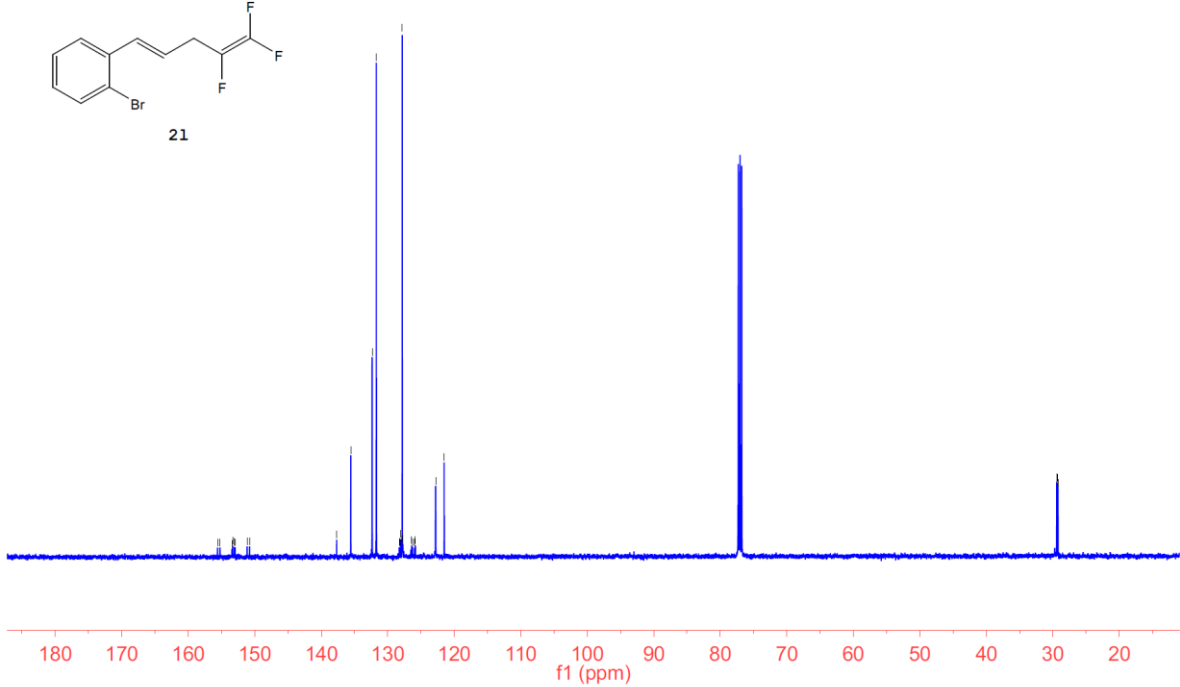

**<sup>13</sup>C NMR (CDCl<sub>3</sub>, 126 MHz) Spectrum of Compound 21**

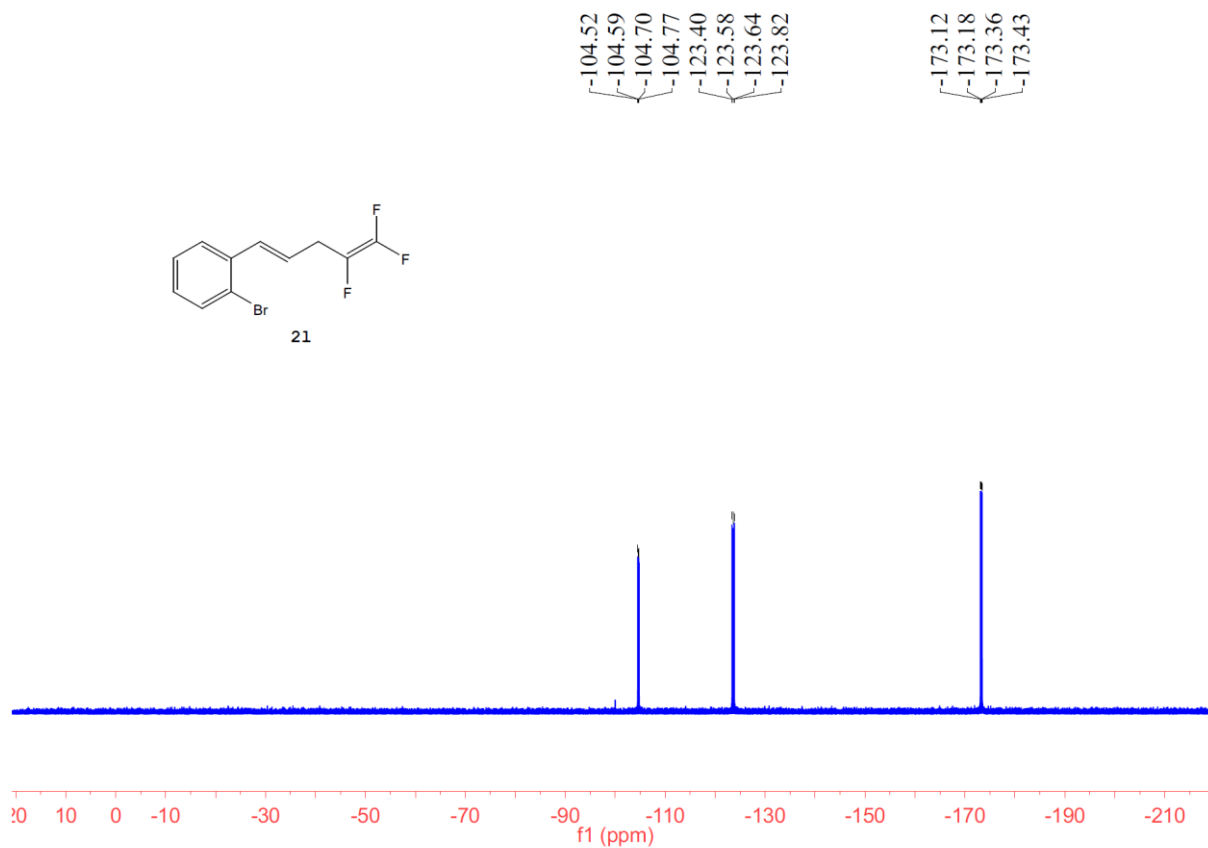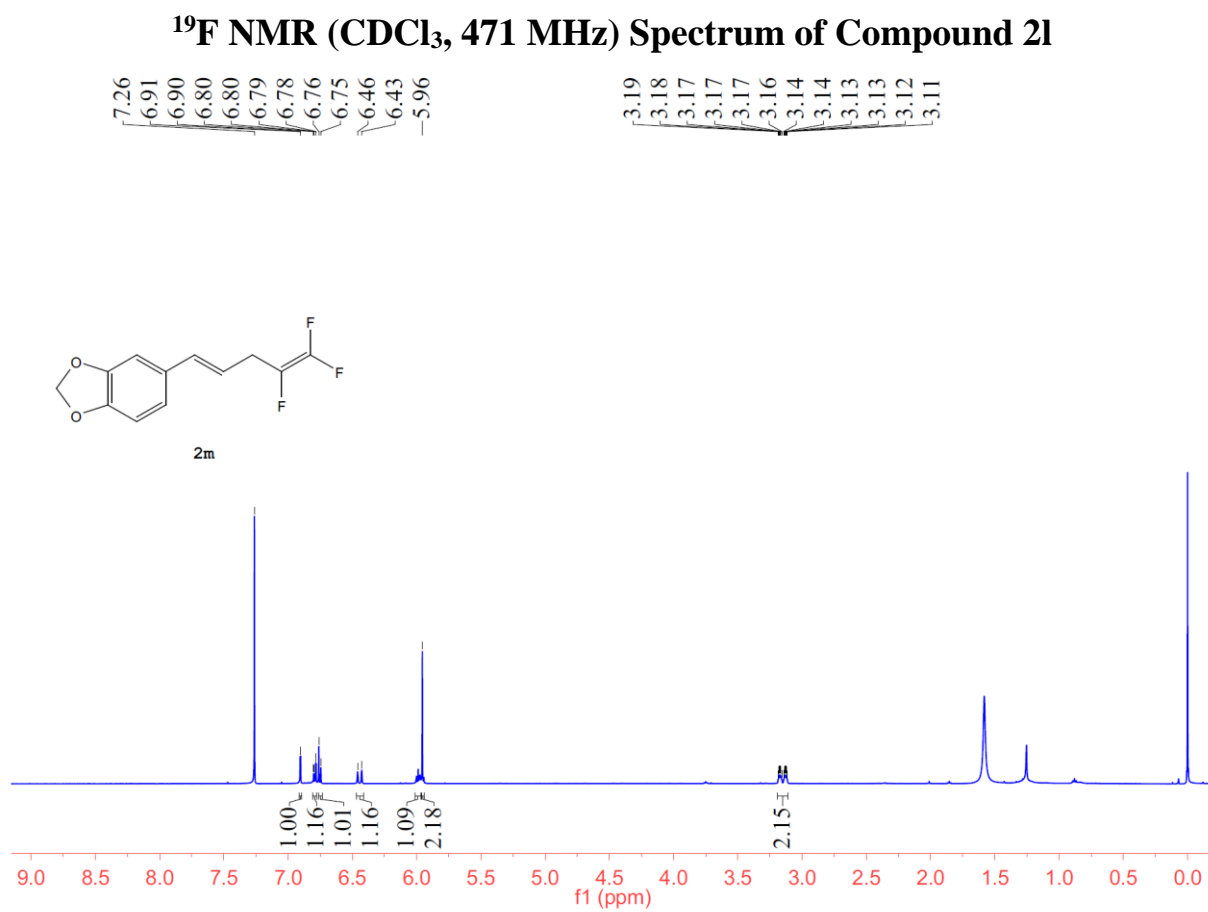



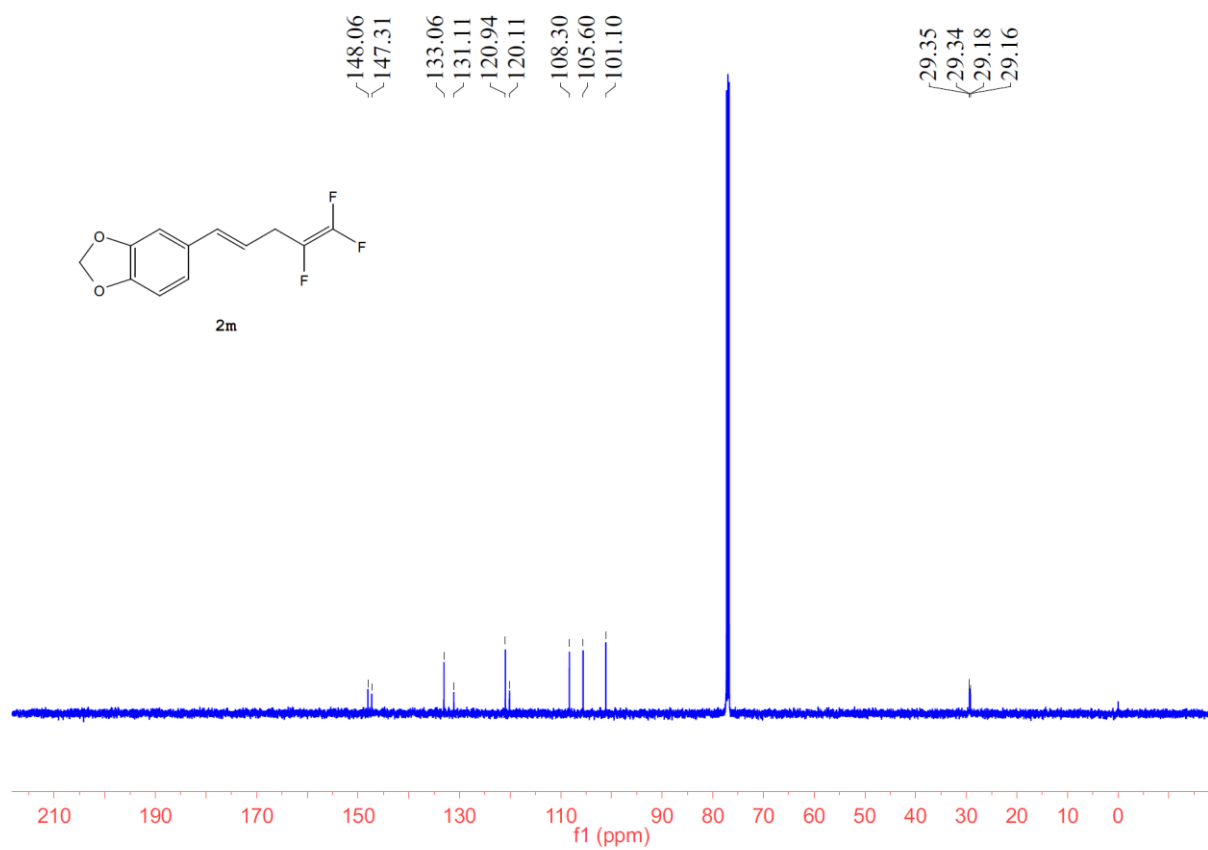

**<sup>13</sup>C NMR (CDCl<sub>3</sub>, 126 MHz) Spectrum of Compound 2m**

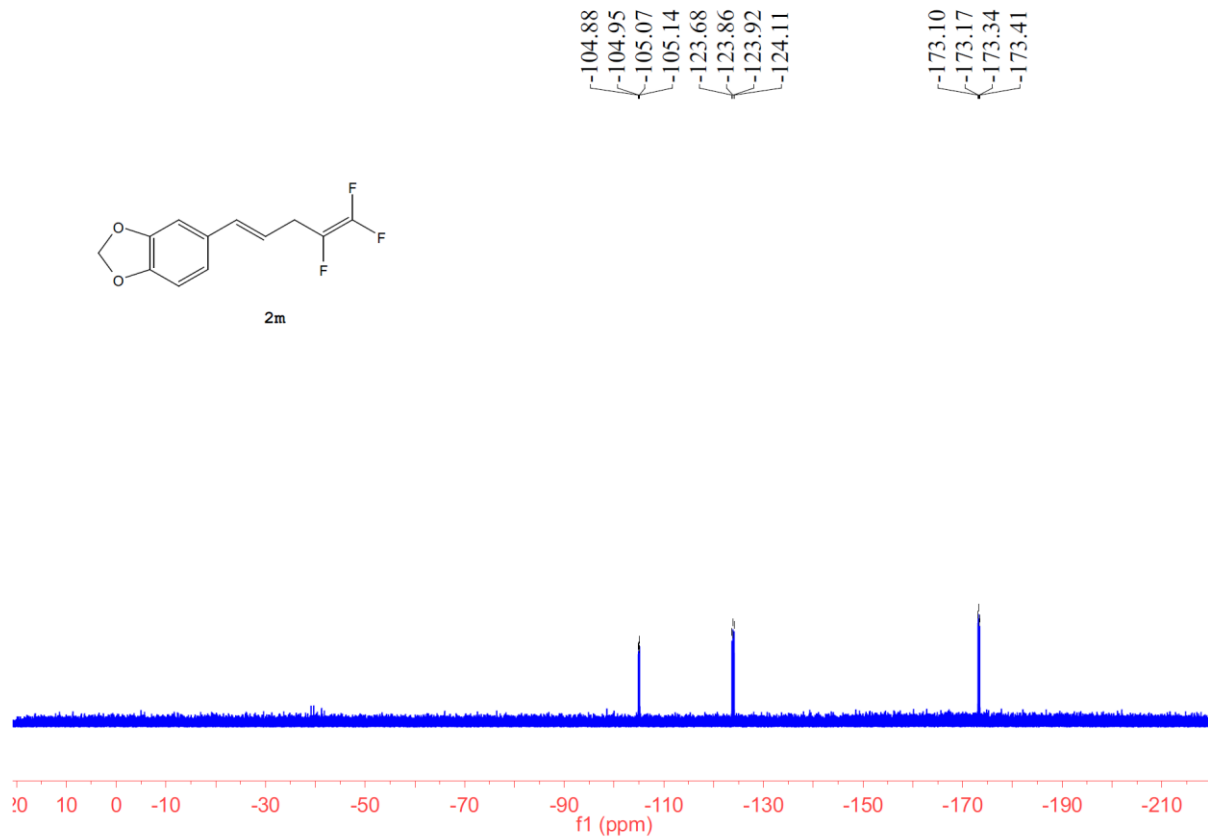

**<sup>19</sup>F NMR (CDCl<sub>3</sub>, 471 MHz) Spectrum of Compound 2m**

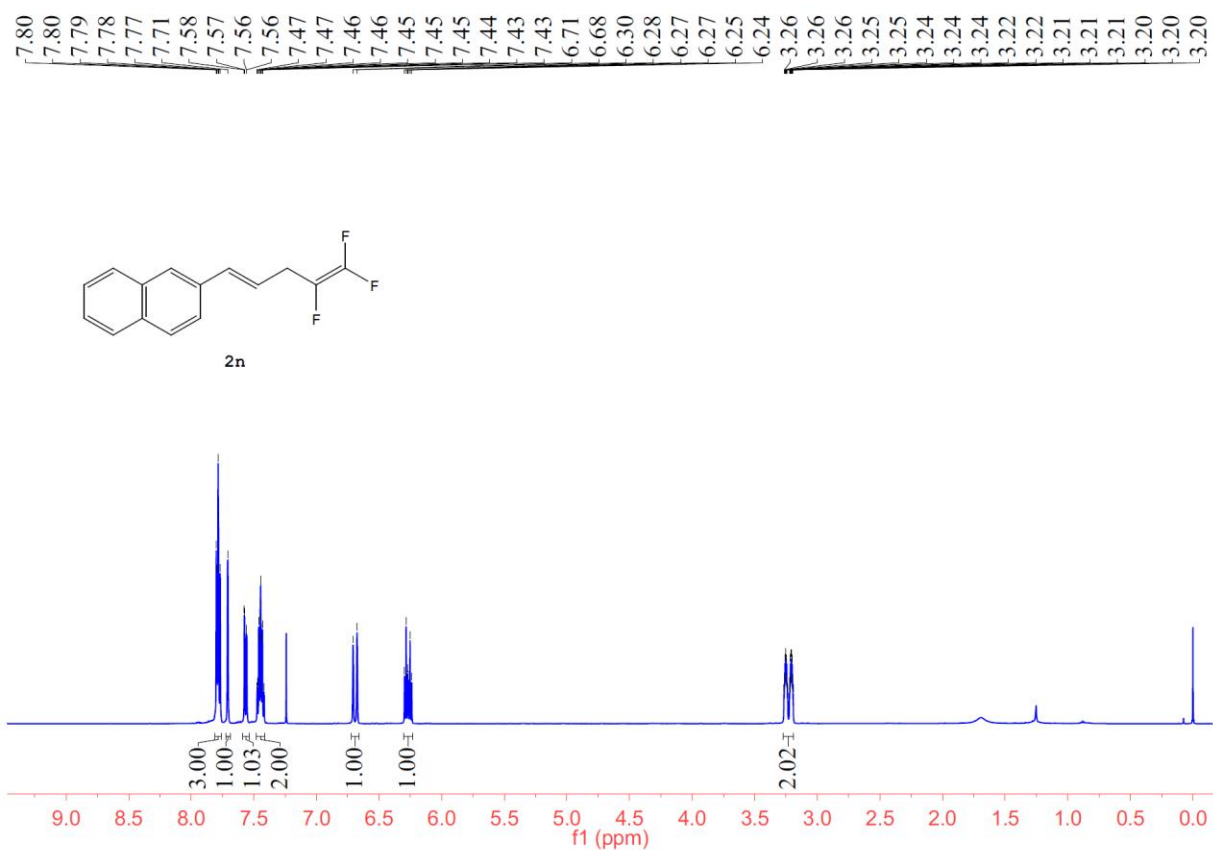

**$^1\text{H}$  NMR ( $\text{CDCl}_3$ , 500 MHz) Spectrum of Compound 2n**

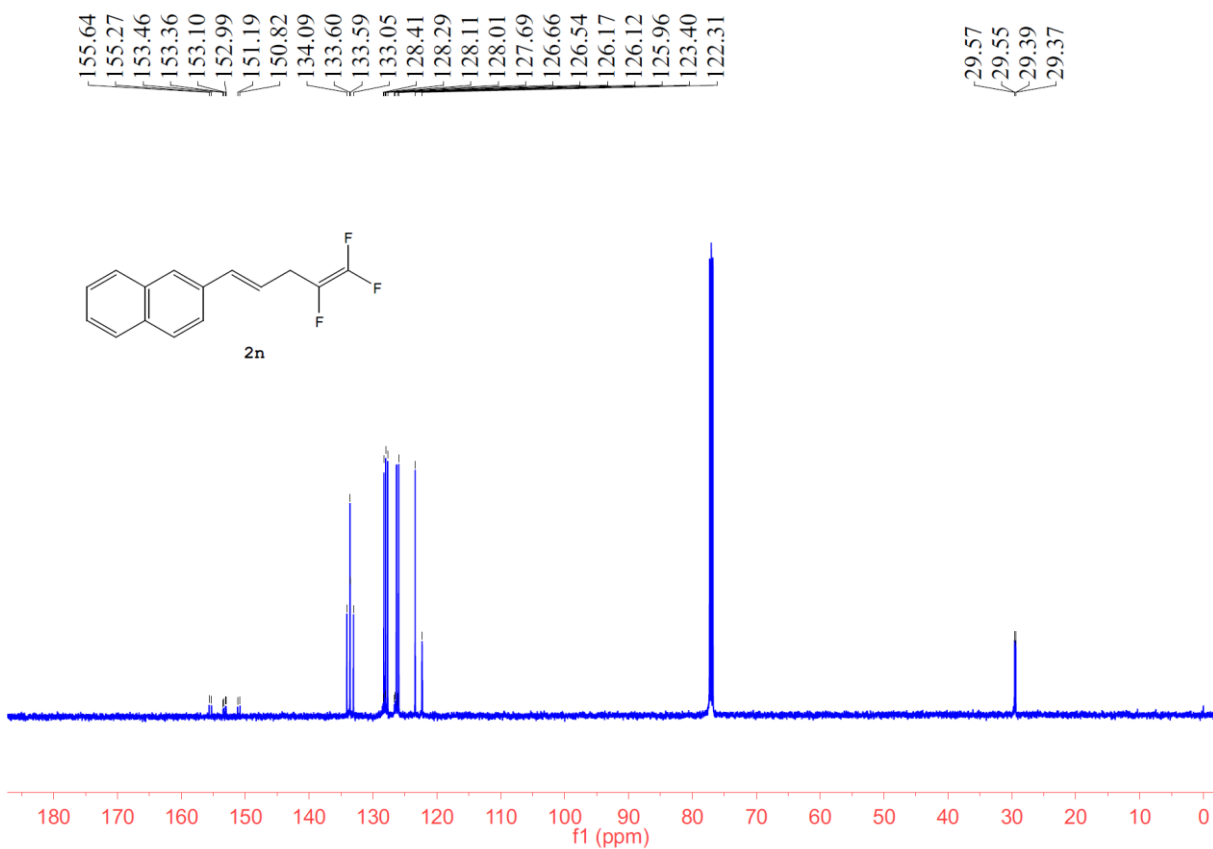

**$^{13}\text{C}$  NMR ( $\text{CDCl}_3$ , 126 MHz) Spectrum of Compound 2n**

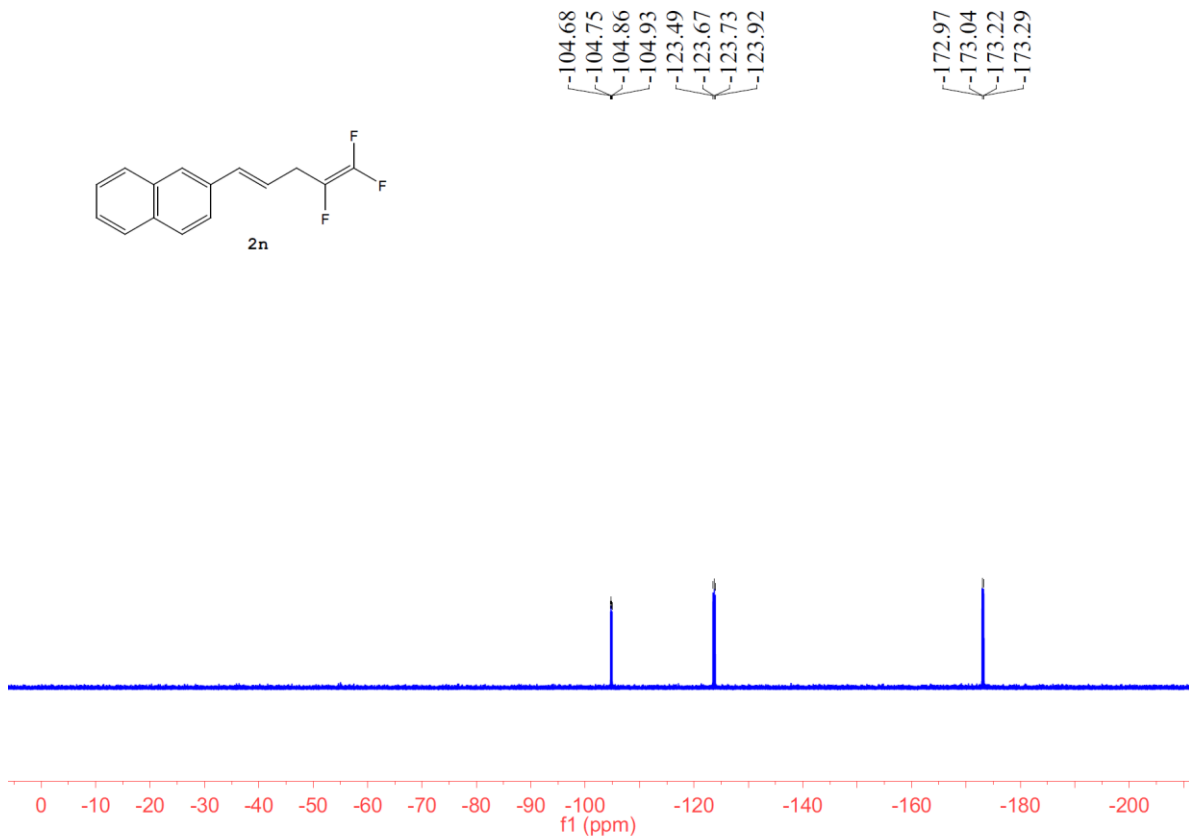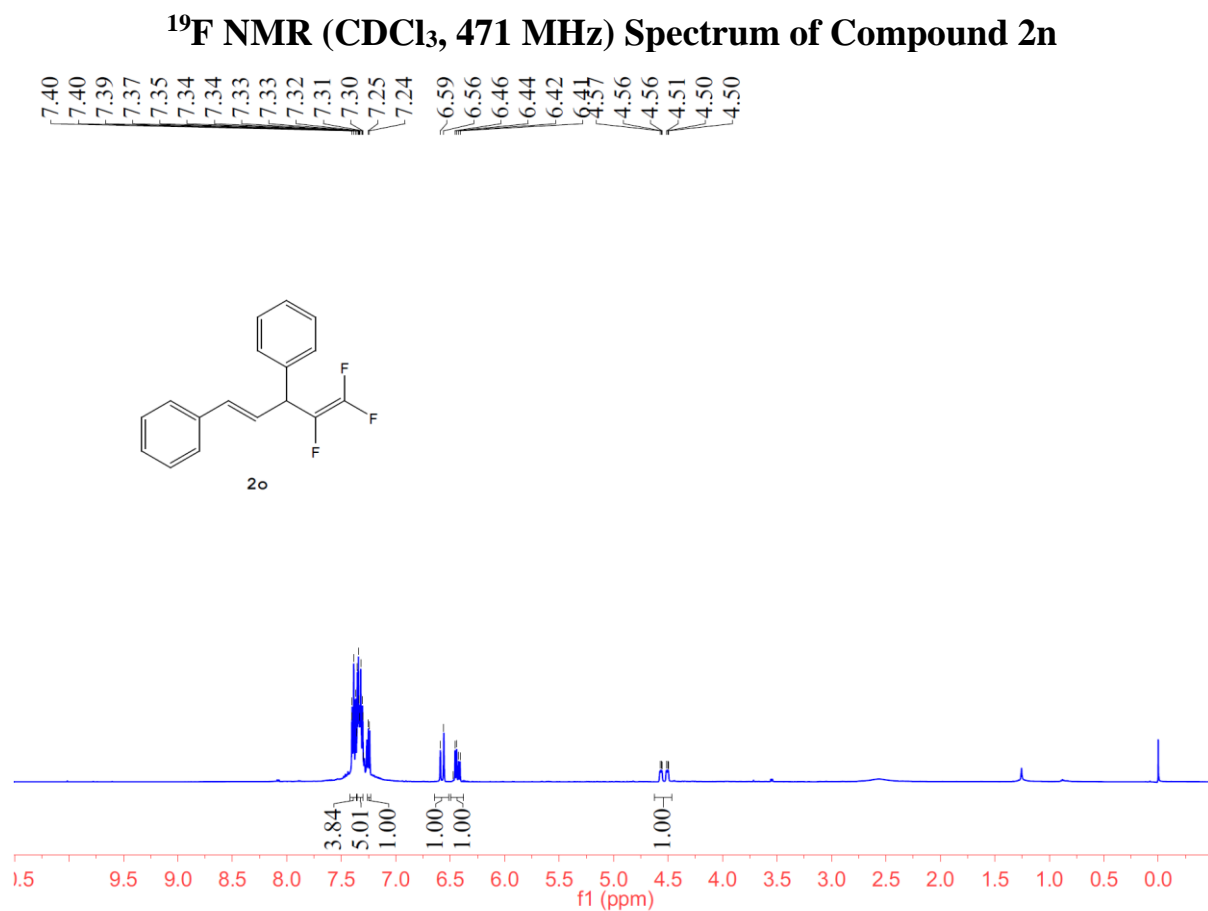

$^1\text{H}$  NMR (CDCl<sub>3</sub>, 500 MHz) Spectrum of Compound **2o**

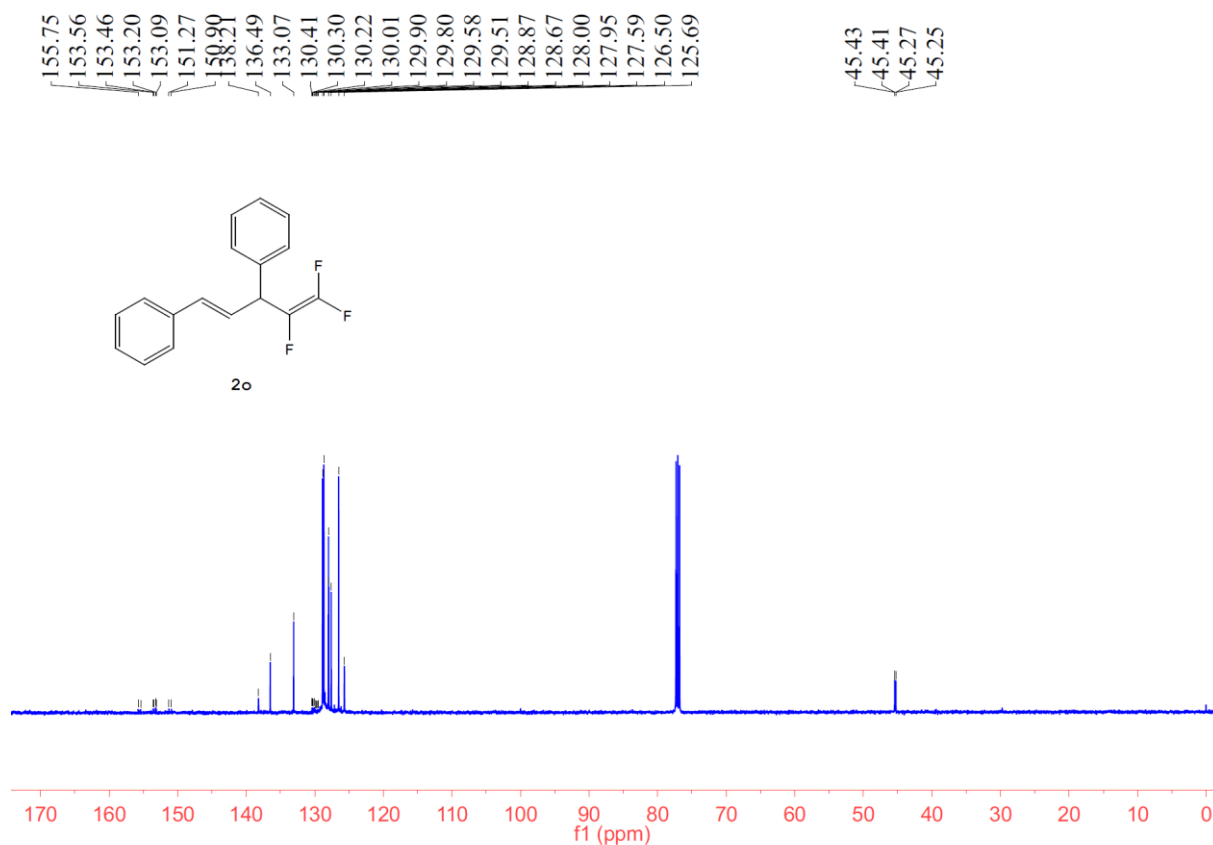

**<sup>13</sup>C NMR (CDCl<sub>3</sub>, 126 MHz) Spectrum of Compound 2o**

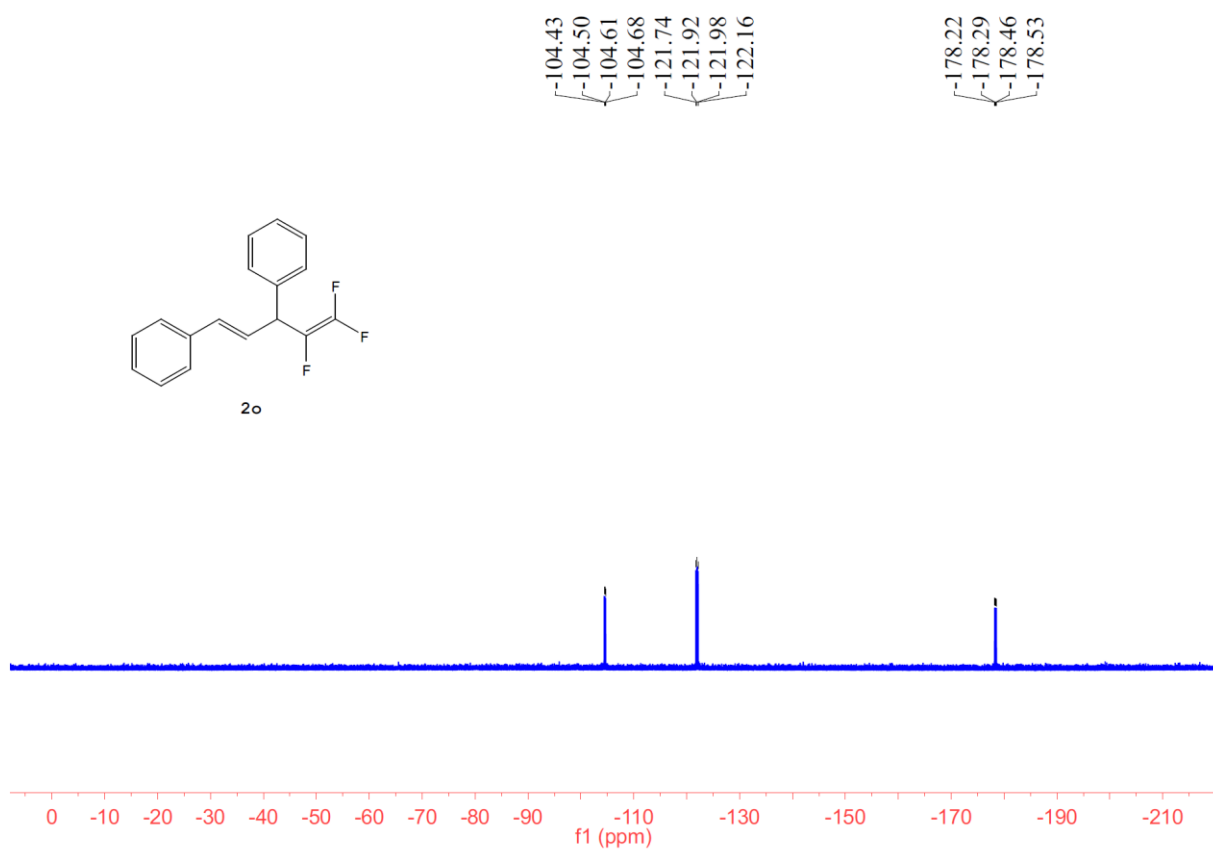

**<sup>19</sup>F NMR (CDCl<sub>3</sub>, 471 MHz) Spectrum of Compound 2o**

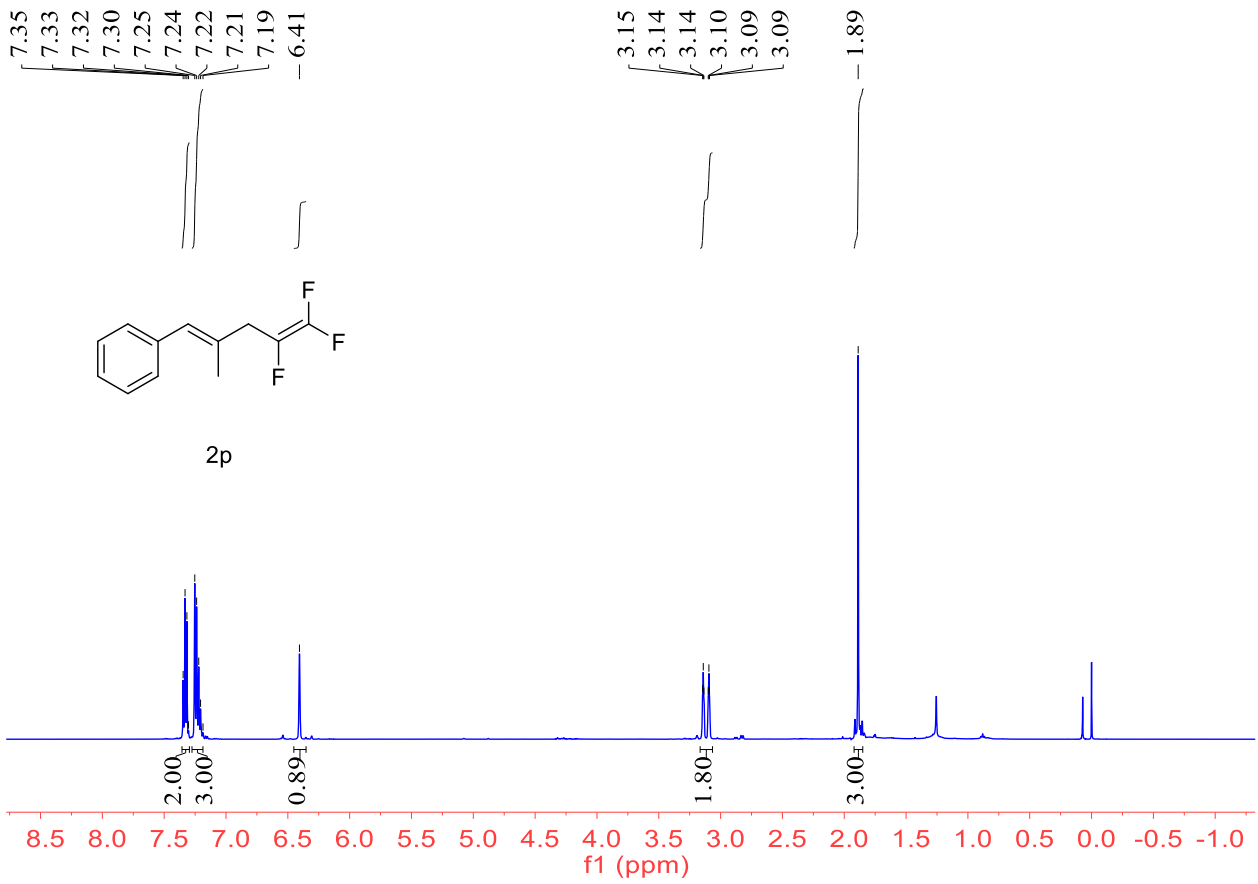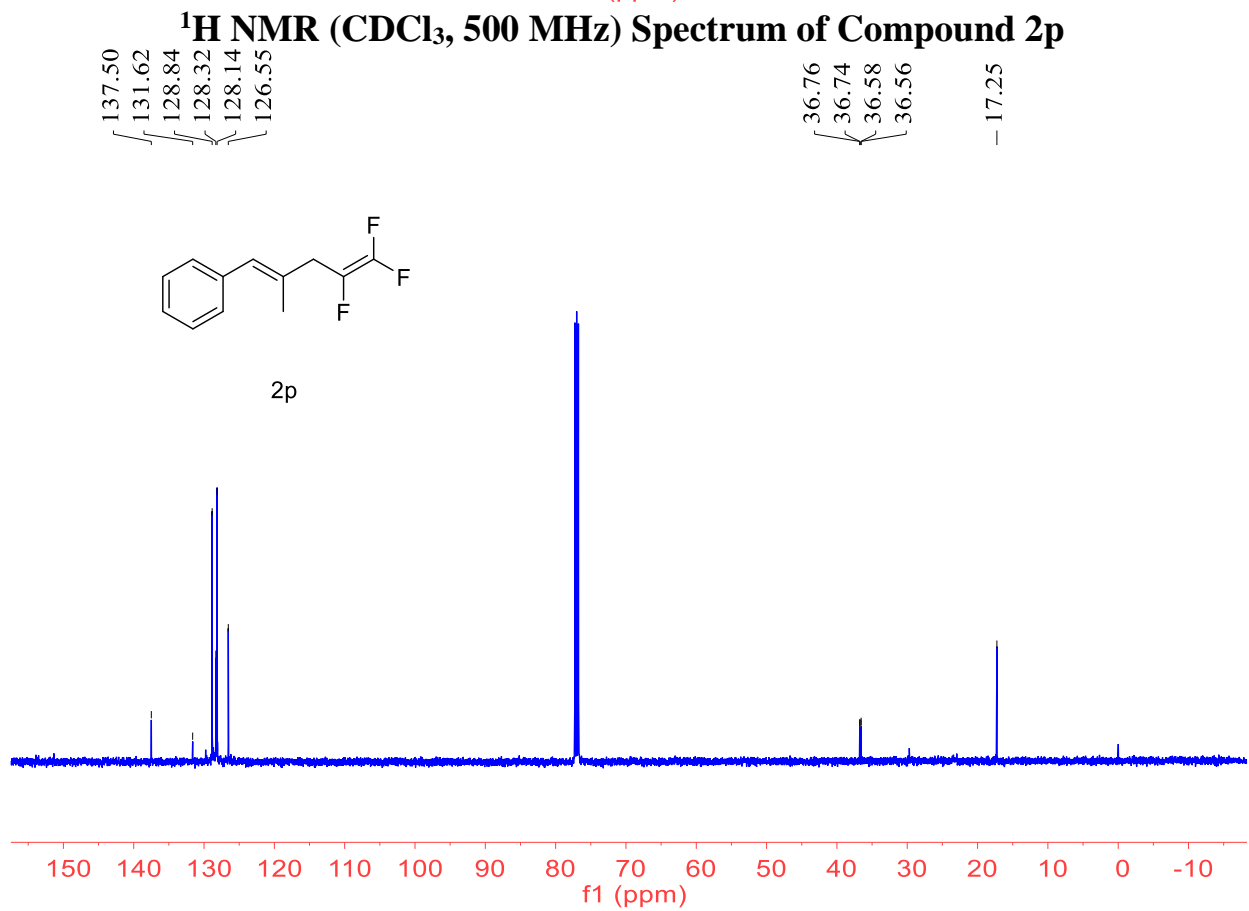

$\left. \begin{array}{l} -104.34 \\ -104.41 \\ -104.53 \\ -104.59 \end{array} \right\}$ 
 $\left. \begin{array}{l} -123.57 \\ -123.75 \\ -123.81 \\ -123.99 \end{array} \right\}$ 
 $\left. \begin{array}{l} -171.86 \\ -171.93 \\ -172.10 \\ -172.17 \end{array} \right\}$

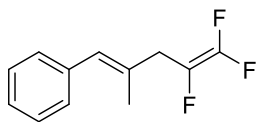

2p

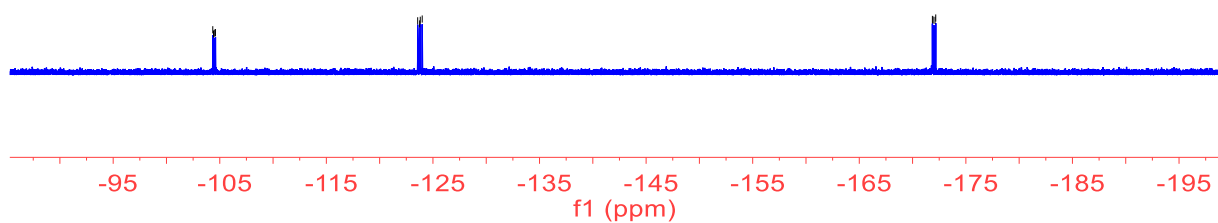

**$^{19}\text{F}$  NMR ( $\text{CDCl}_3$ , 471 MHz) Spectrum of Compound 2p**

$\left. \begin{array}{l} 7.34 \\ 7.32 \\ 7.31 \\ 7.28 \\ 7.24 \\ 7.23 \\ 7.22 \\ 7.20 \\ 7.18 \\ 7.17 \\ 6.40 \end{array} \right\}$ 
 $\left. \begin{array}{l} 3.15 \\ 3.15 \\ 3.10 \\ 3.10 \end{array} \right\}$ 
 $\left. \begin{array}{l} 2.25 \\ 2.23 \\ 2.22 \end{array} \right\}$ 
 $\left. \begin{array}{l} 1.29 \\ 1.28 \\ 1.28 \\ 1.27 \\ 1.26 \\ 1.26 \\ 0.89 \\ 0.87 \\ 0.86 \end{array} \right\}$

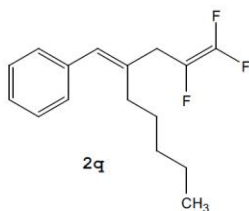

2q

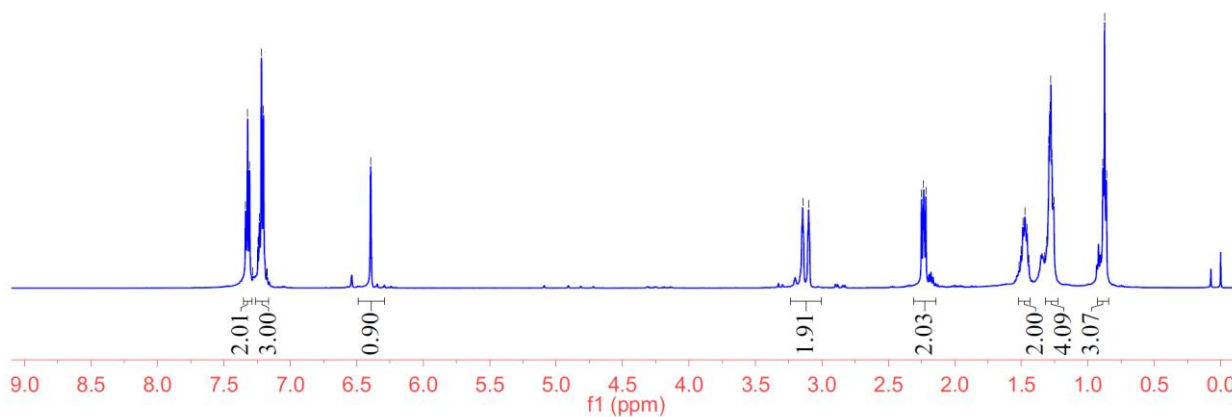

**$^1\text{H}$  NMR ( $\text{CDCl}_3$ , 500 MHz) Spectrum of Compound 2q**

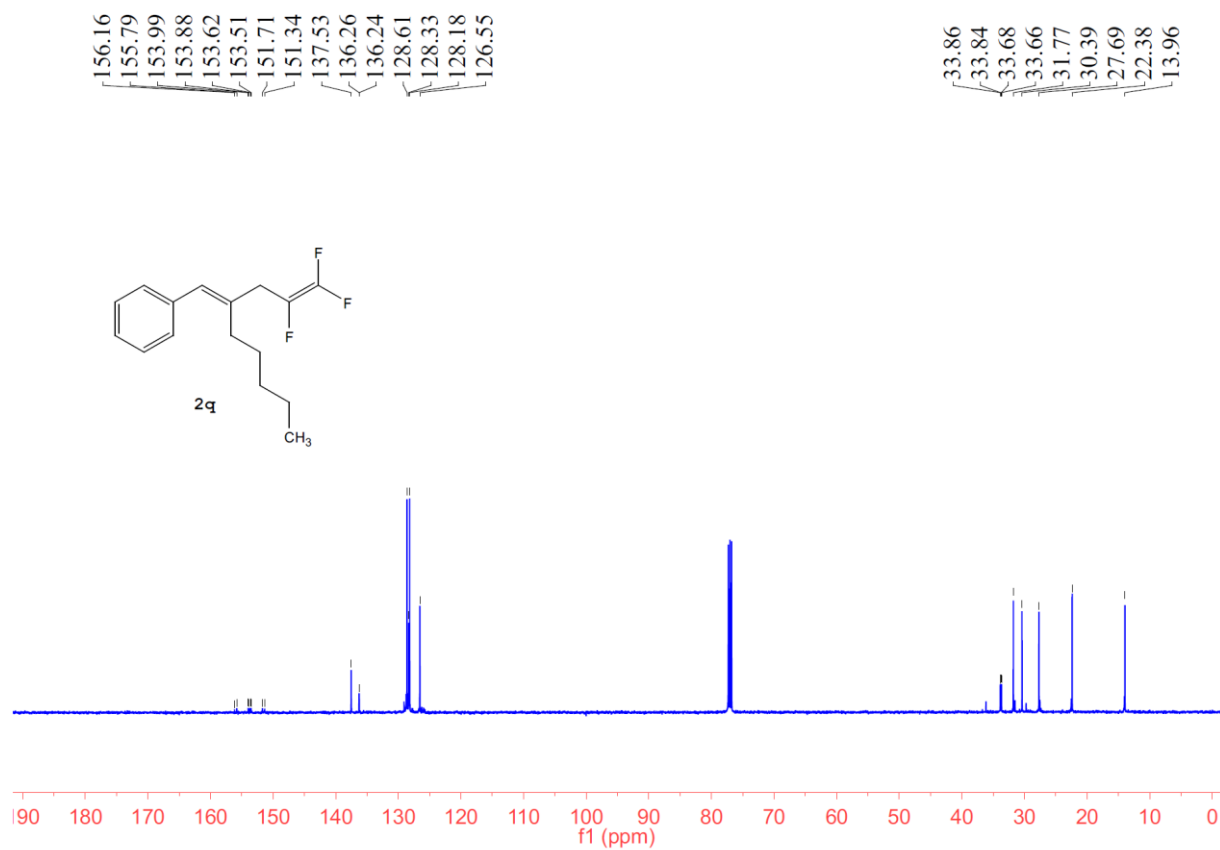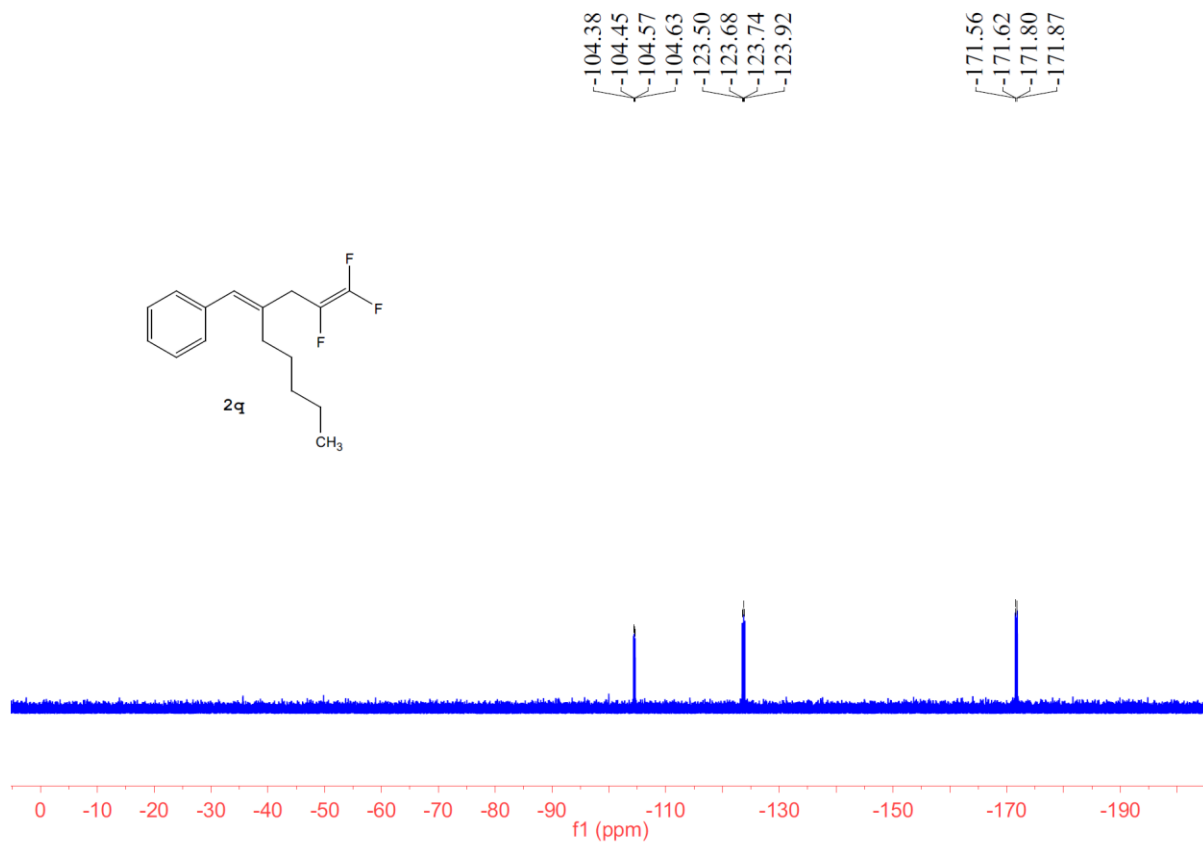

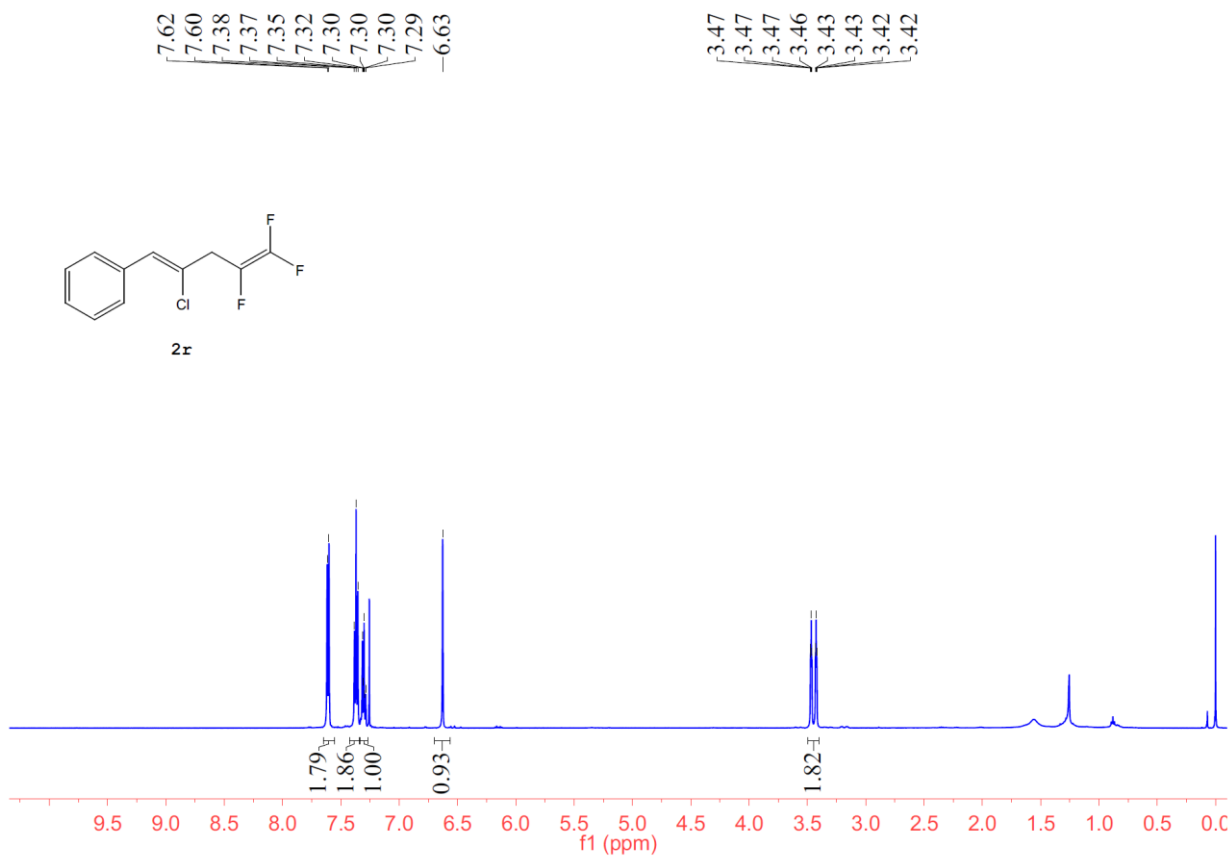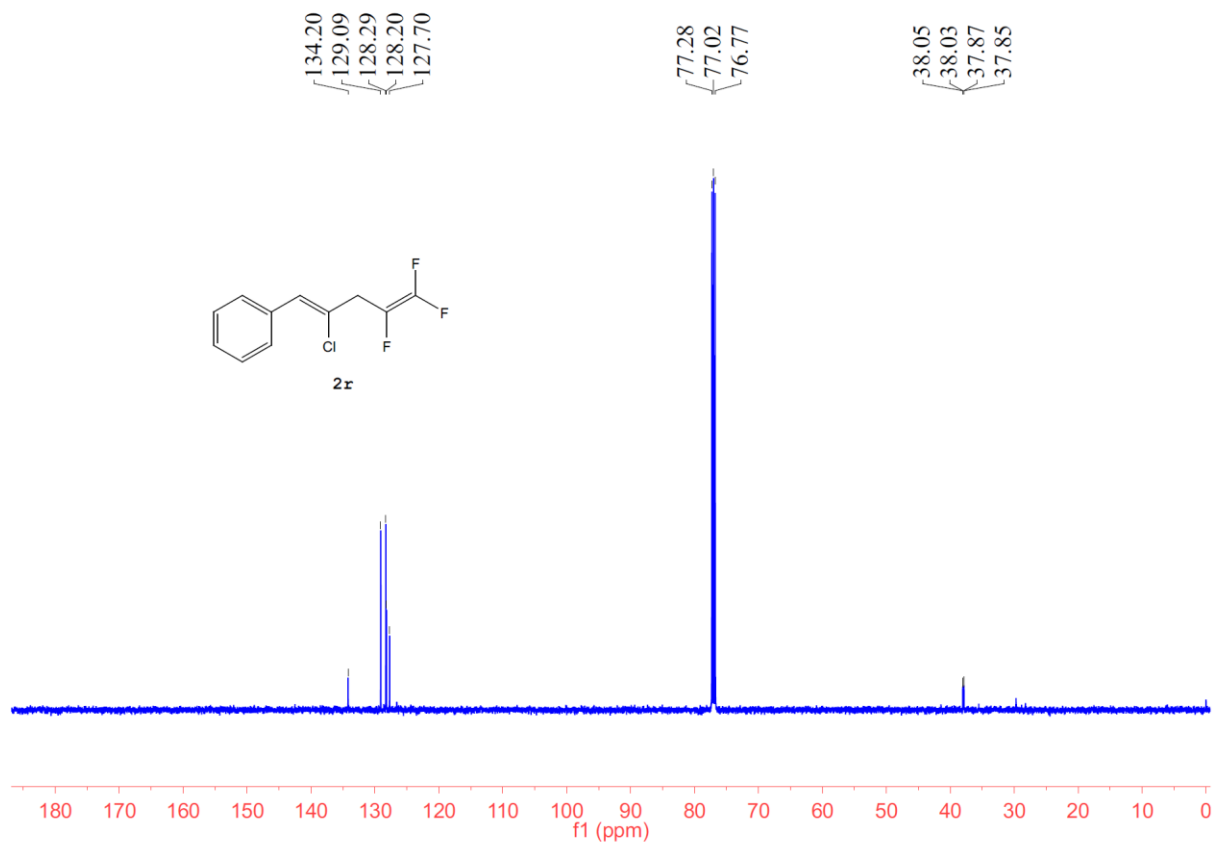

<sup>13</sup>C NMR (CDCl<sub>3</sub>, 126 MHz) Spectrum of Compound 2r



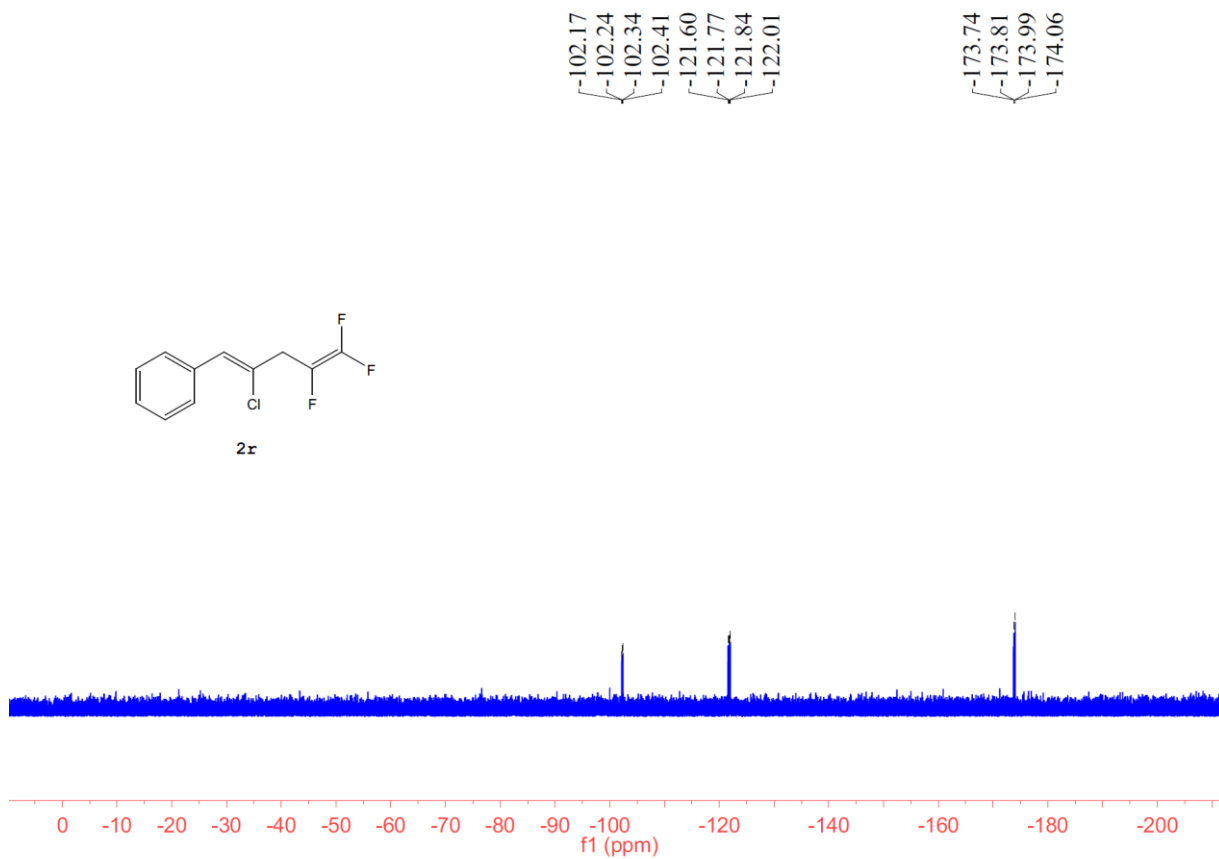

**<sup>19</sup>F NMR (CDCl<sub>3</sub>, 471 MHz) Spectrum of Compound 2r**

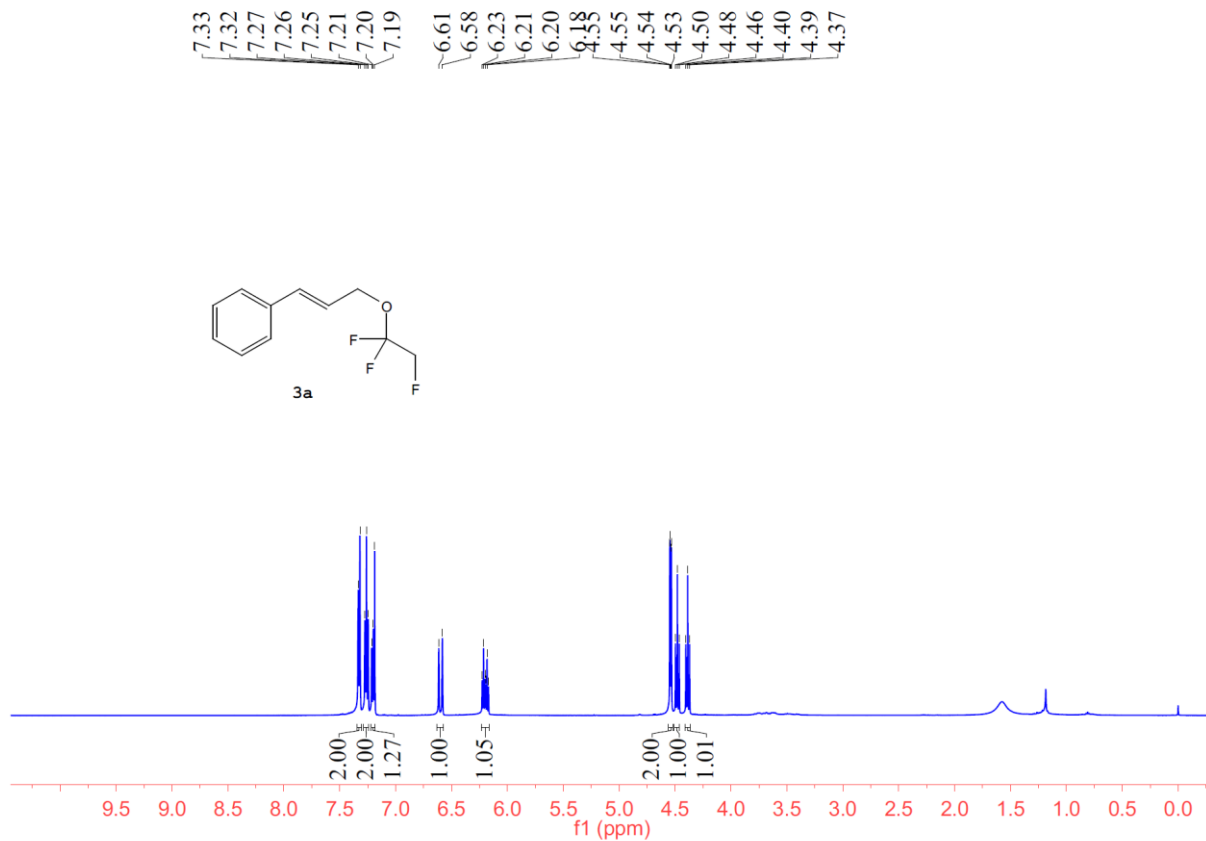

**<sup>1</sup>H NMR (CDCl<sub>3</sub>, 500 MHz) Spectrum of Compound 3a**

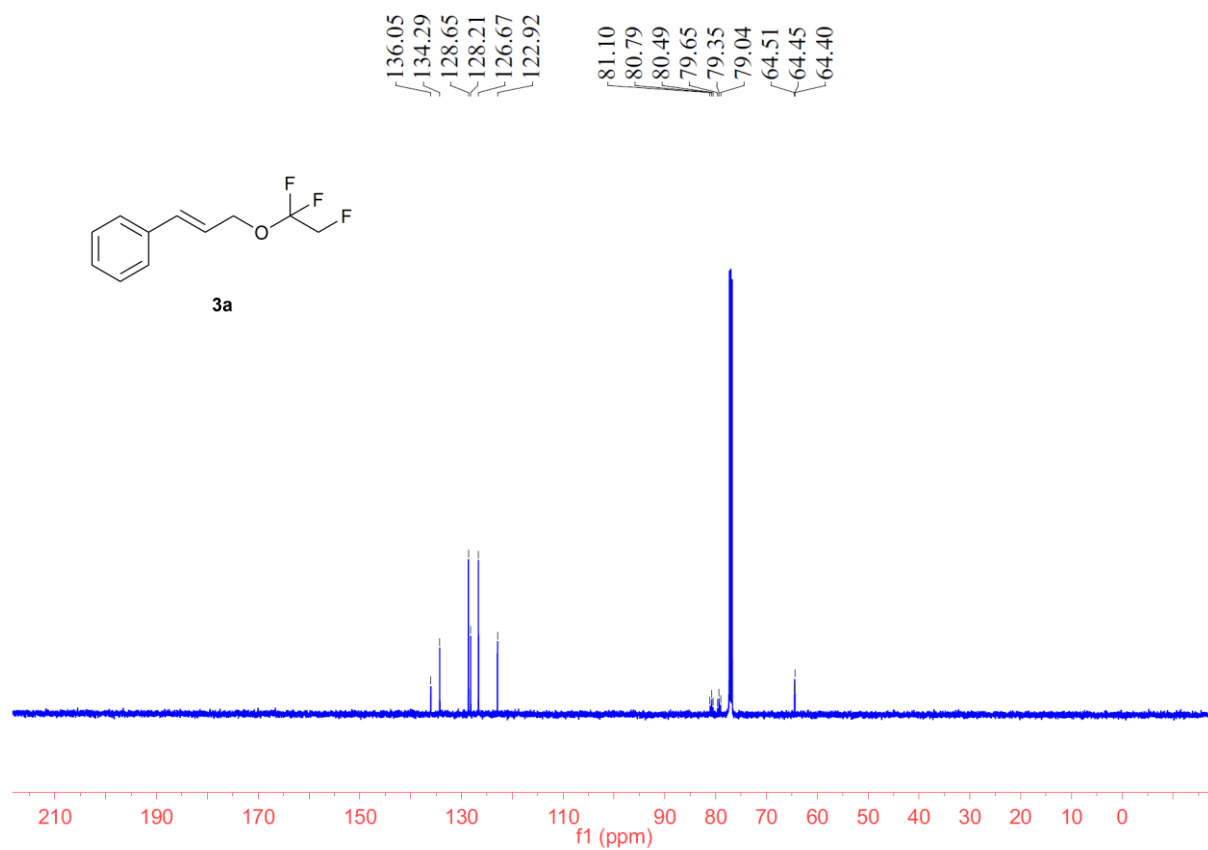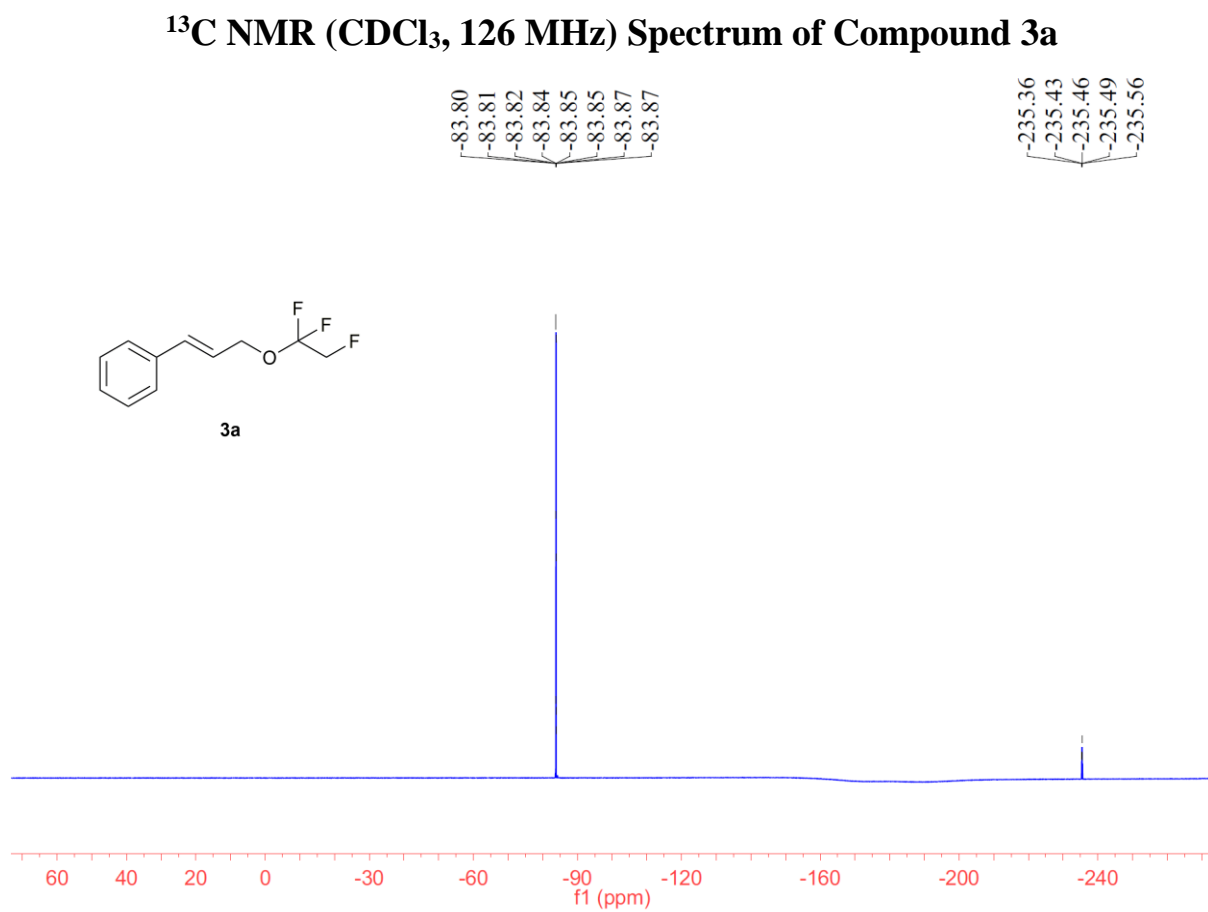

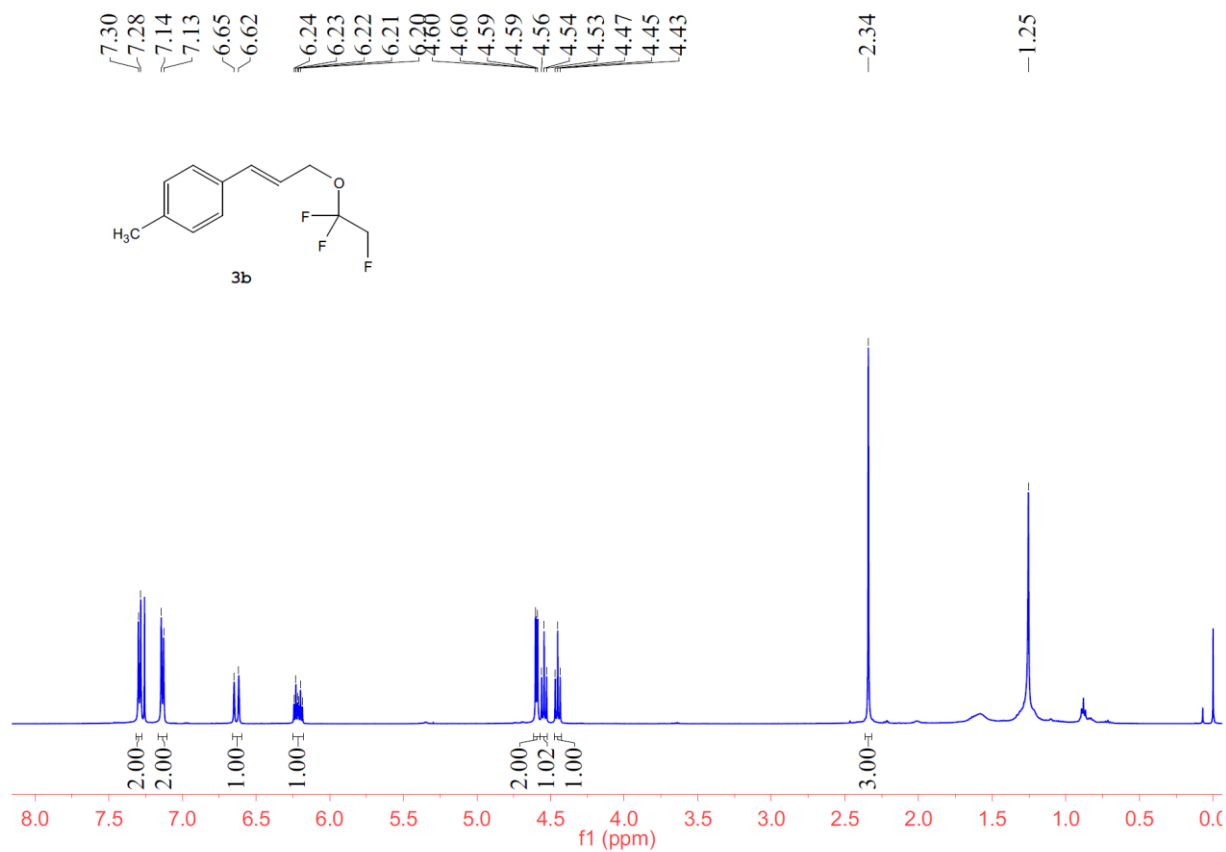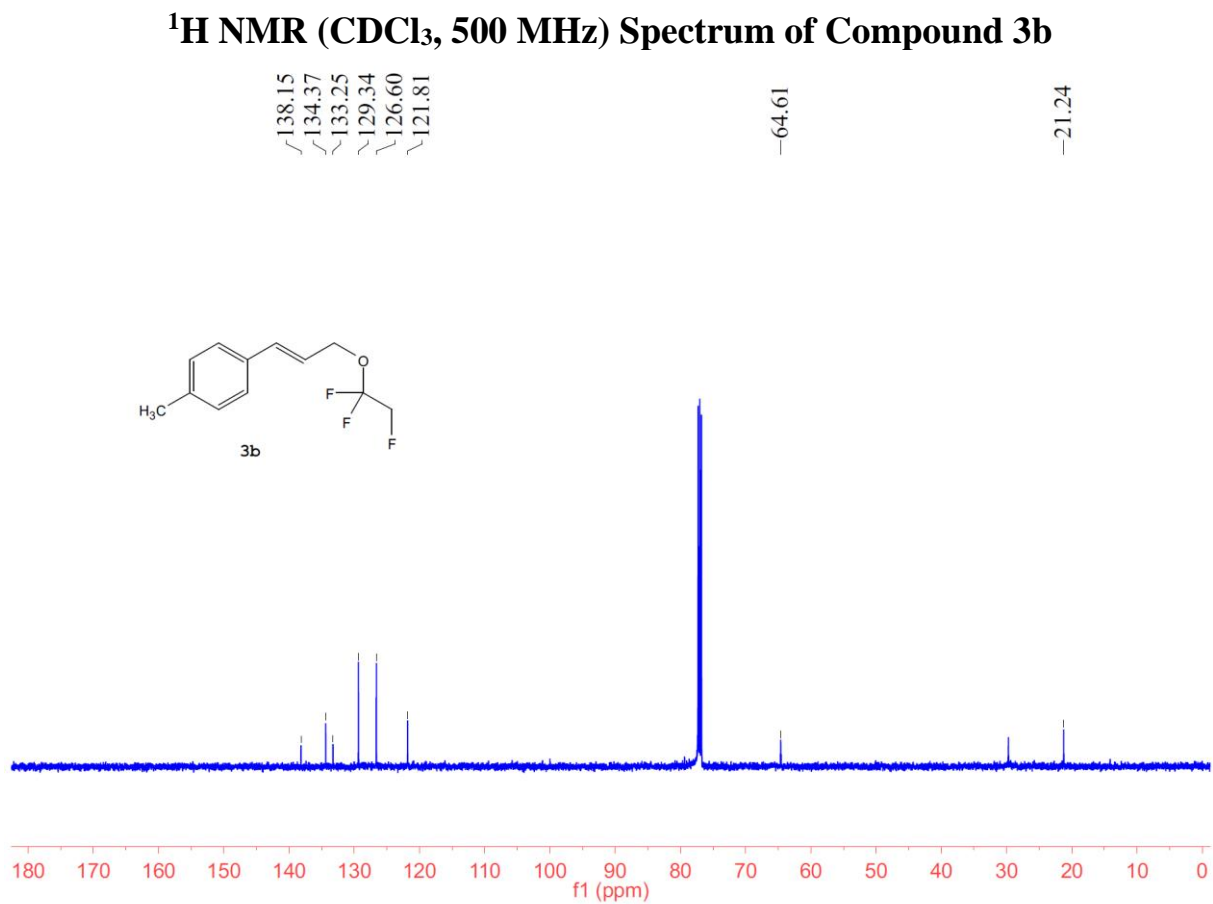

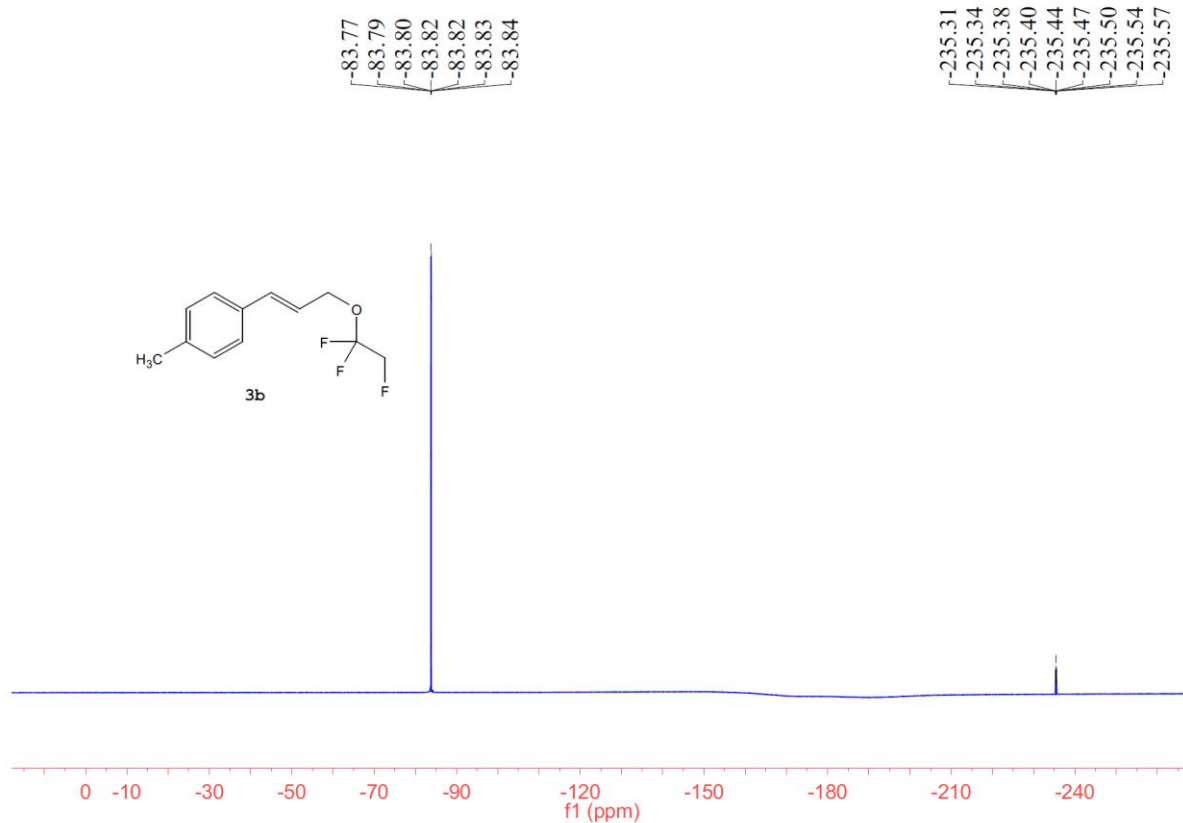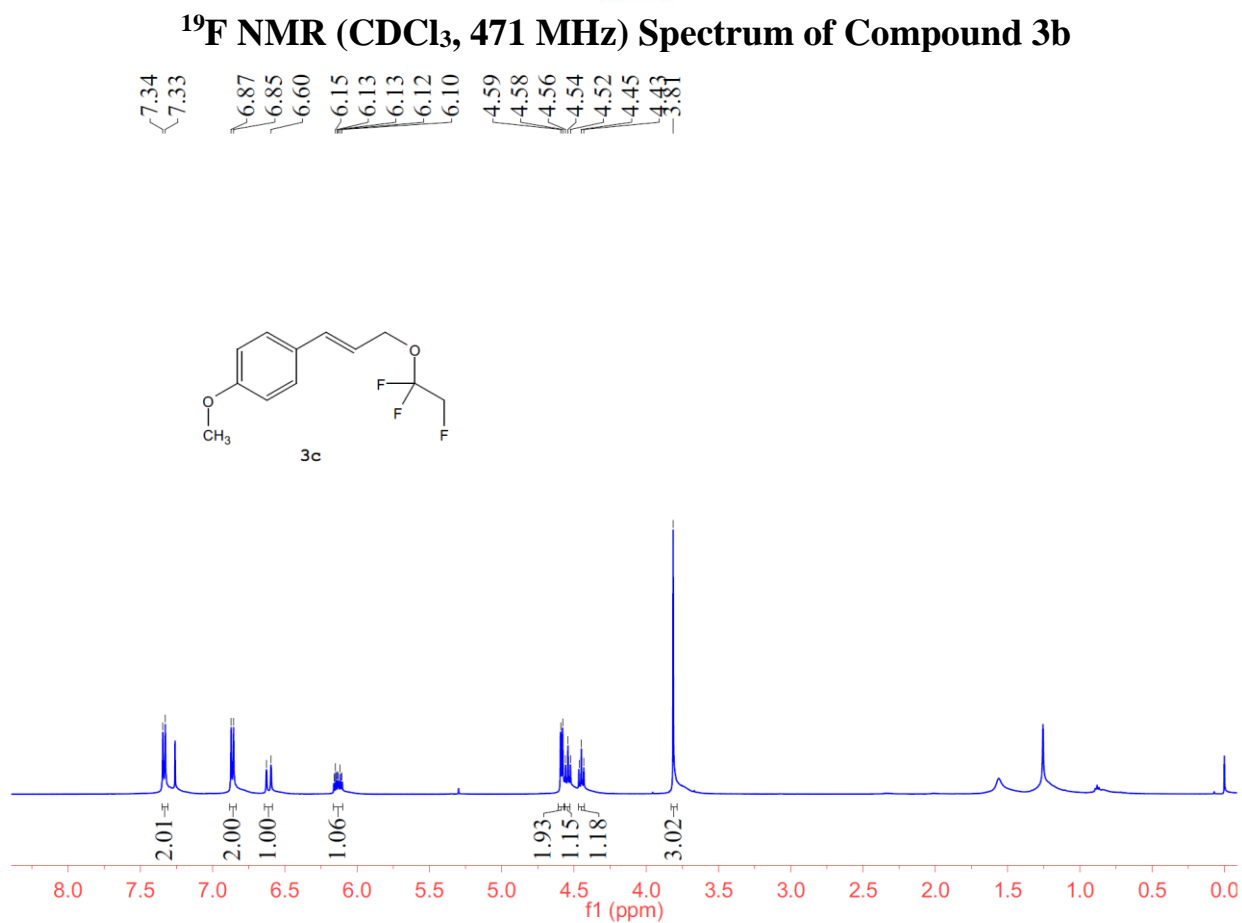

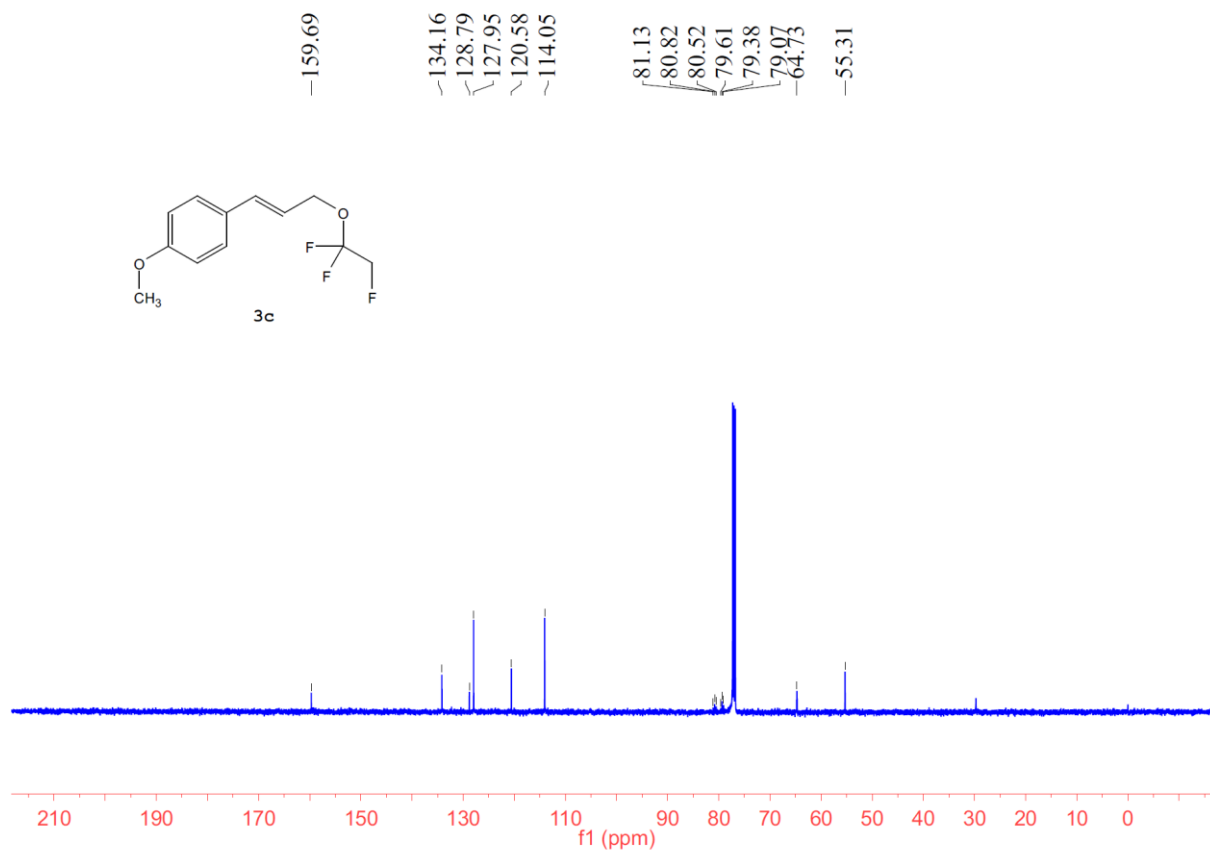

**<sup>13</sup>C NMR (CDCl<sub>3</sub>, 126 MHz) Spectrum of Compound 3c**

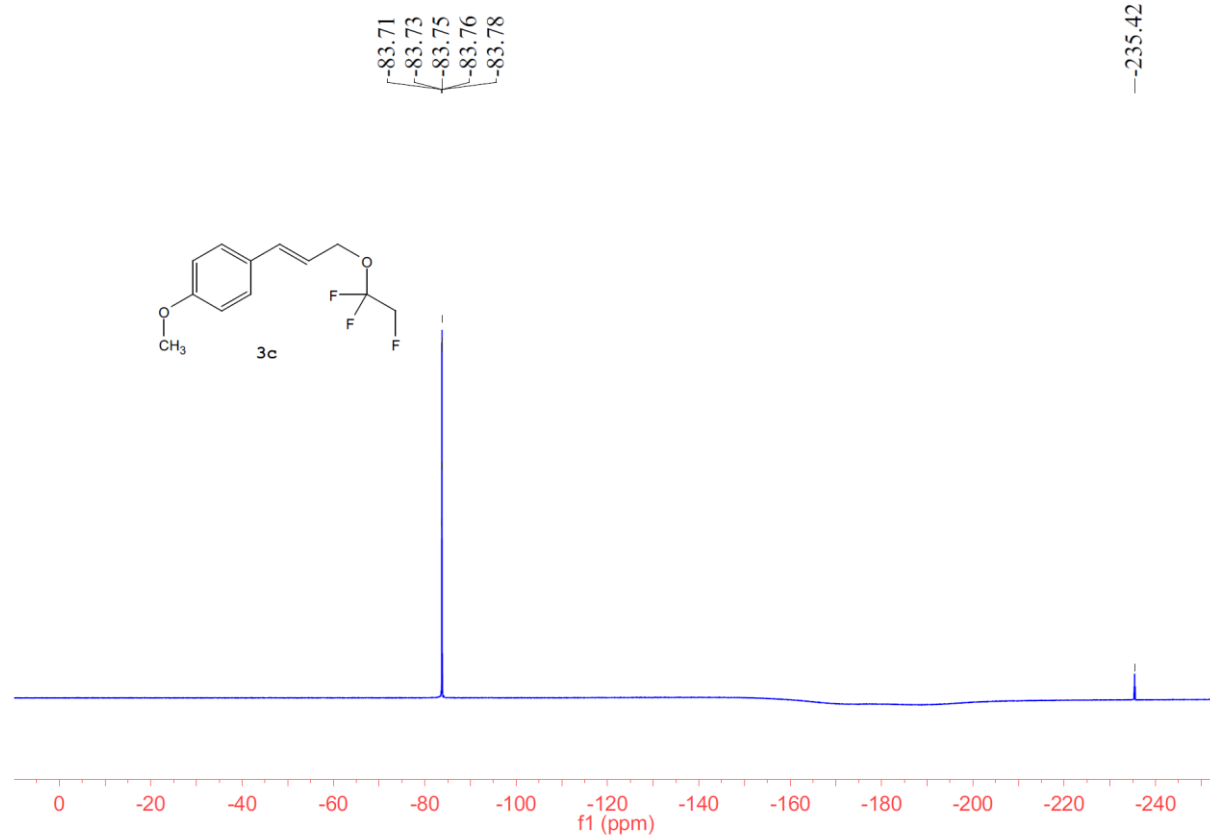

**<sup>19</sup>F NMR (CDCl<sub>3</sub>, 471 MHz) Spectrum of Compound 3c**

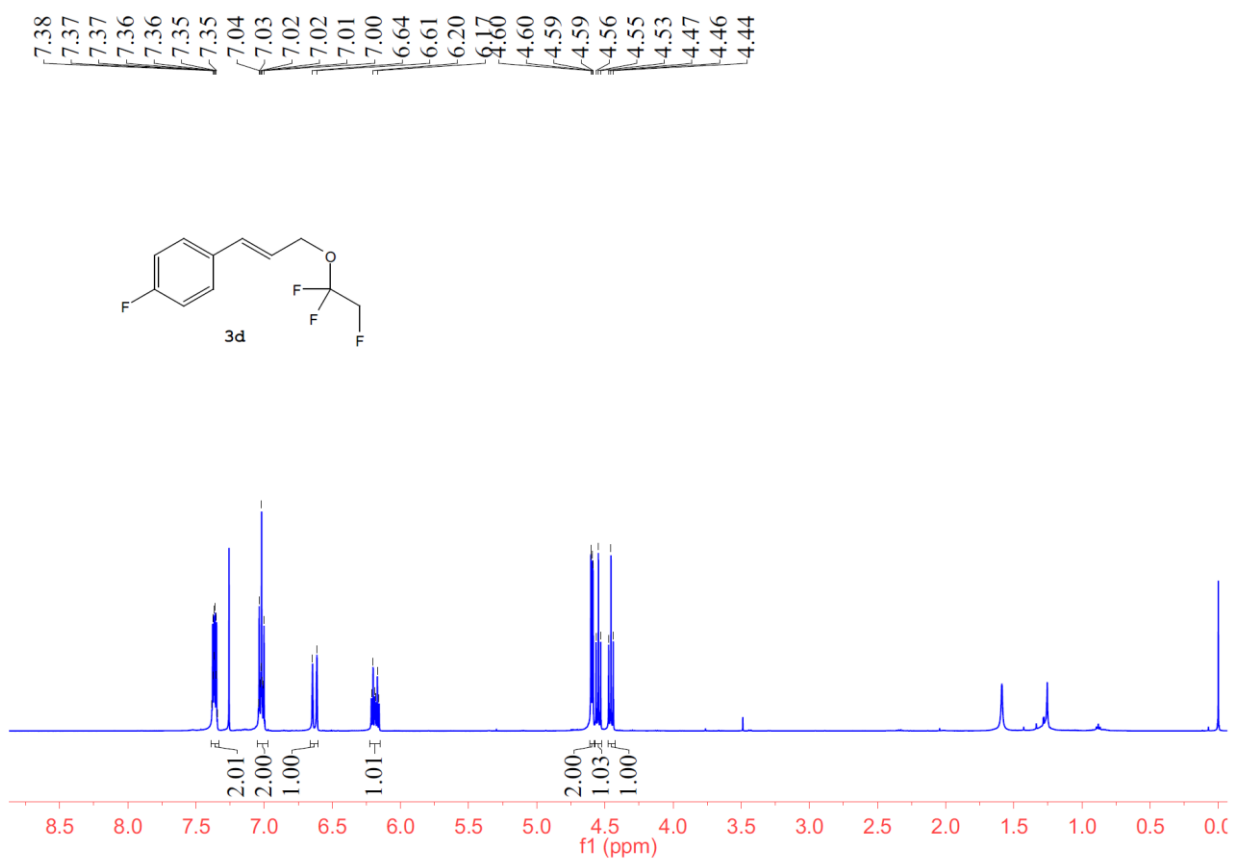

**<sup>1</sup>H NMR (CDCl<sub>3</sub>, 500 MHz) Spectrum of Compound 3d**

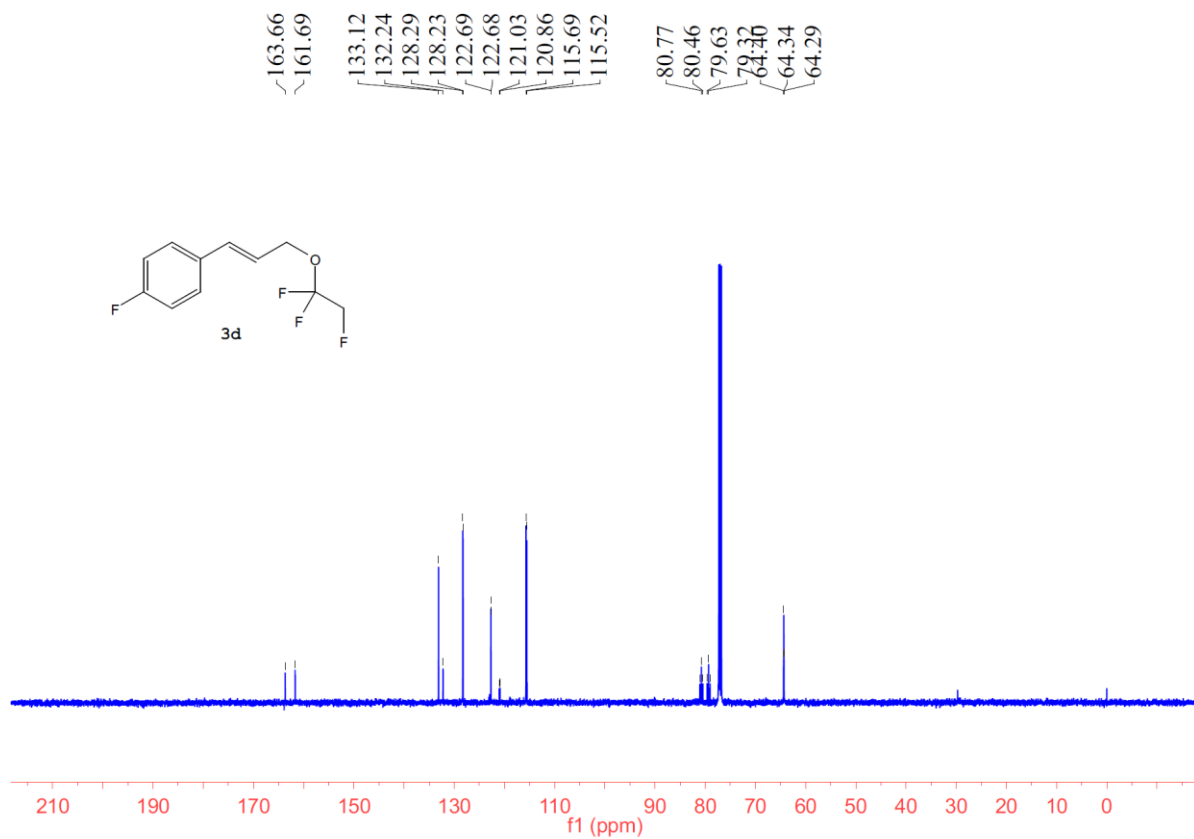

**<sup>13</sup>C NMR (CDCl<sub>3</sub>, 126 MHz) Spectrum of Compound 3d**

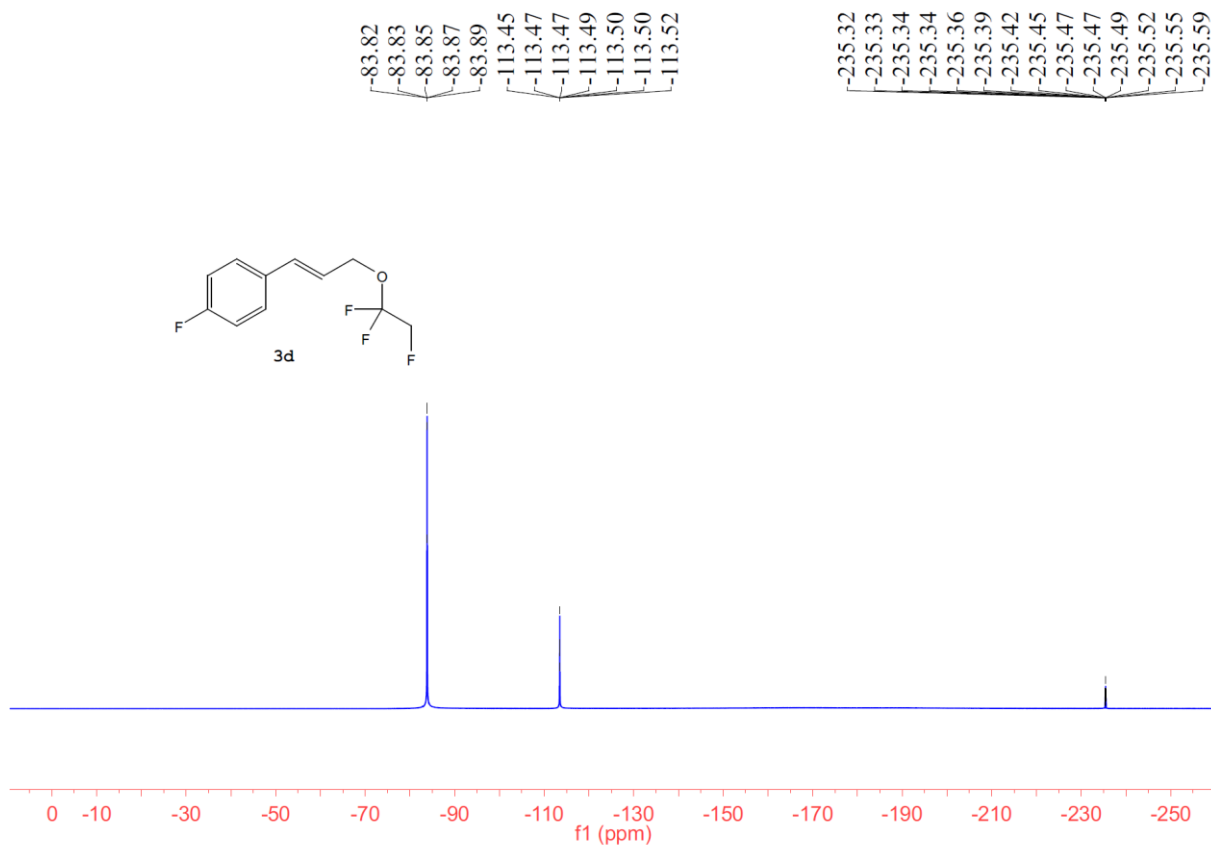

**<sup>19</sup>F NMR (CDCl<sub>3</sub>, 471 MHz) Spectrum of Compound 3d**

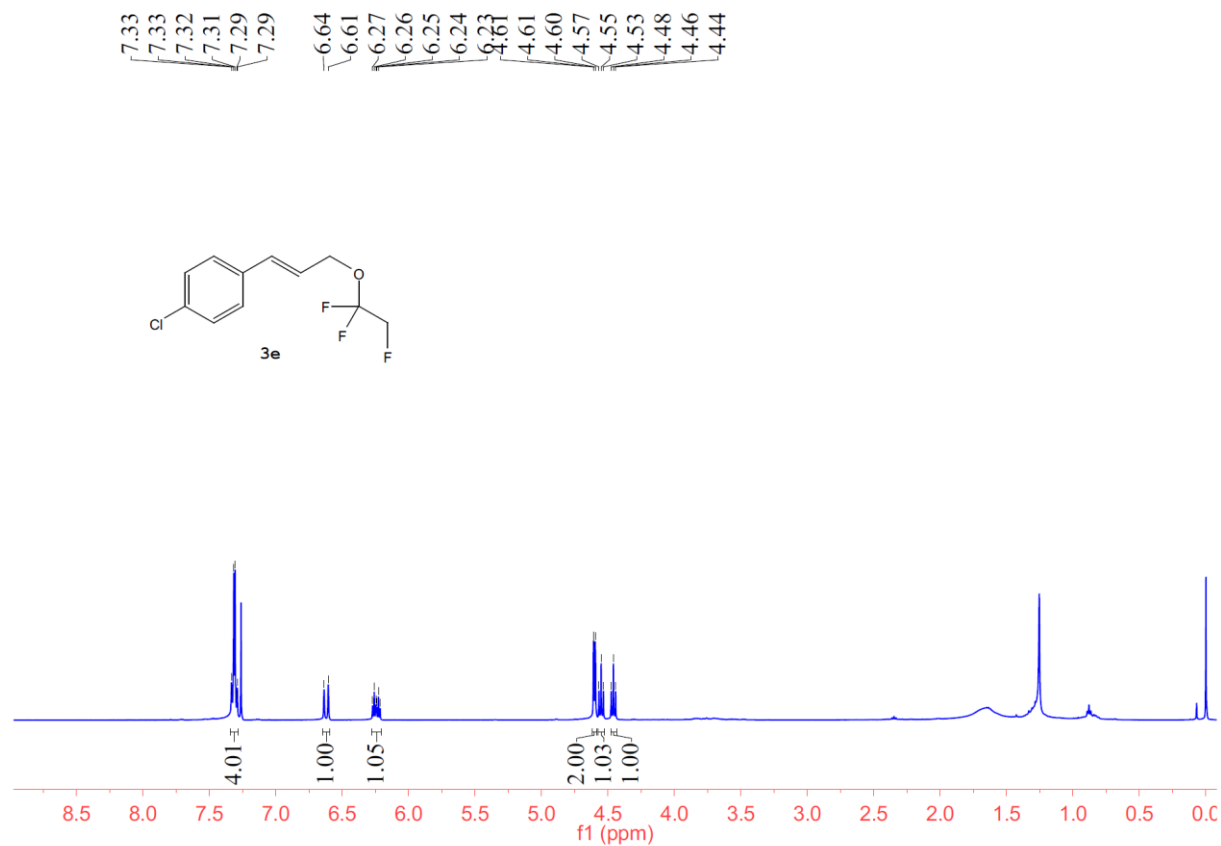

**<sup>1</sup>H NMR (CDCl<sub>3</sub>, 500 MHz) Spectrum of Compound 3e**

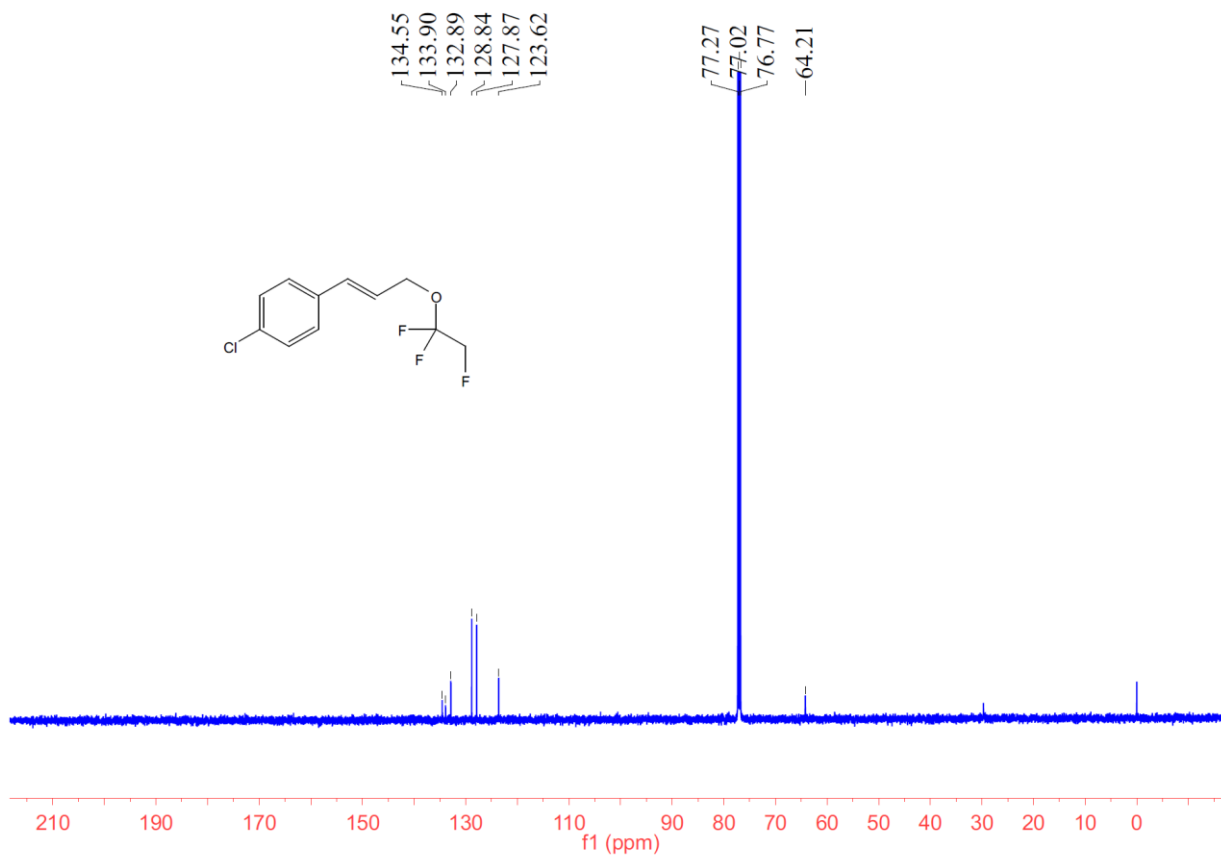

**<sup>13</sup>C NMR (CDCl<sub>3</sub>, 126 MHz) Spectrum of Compound 3e**

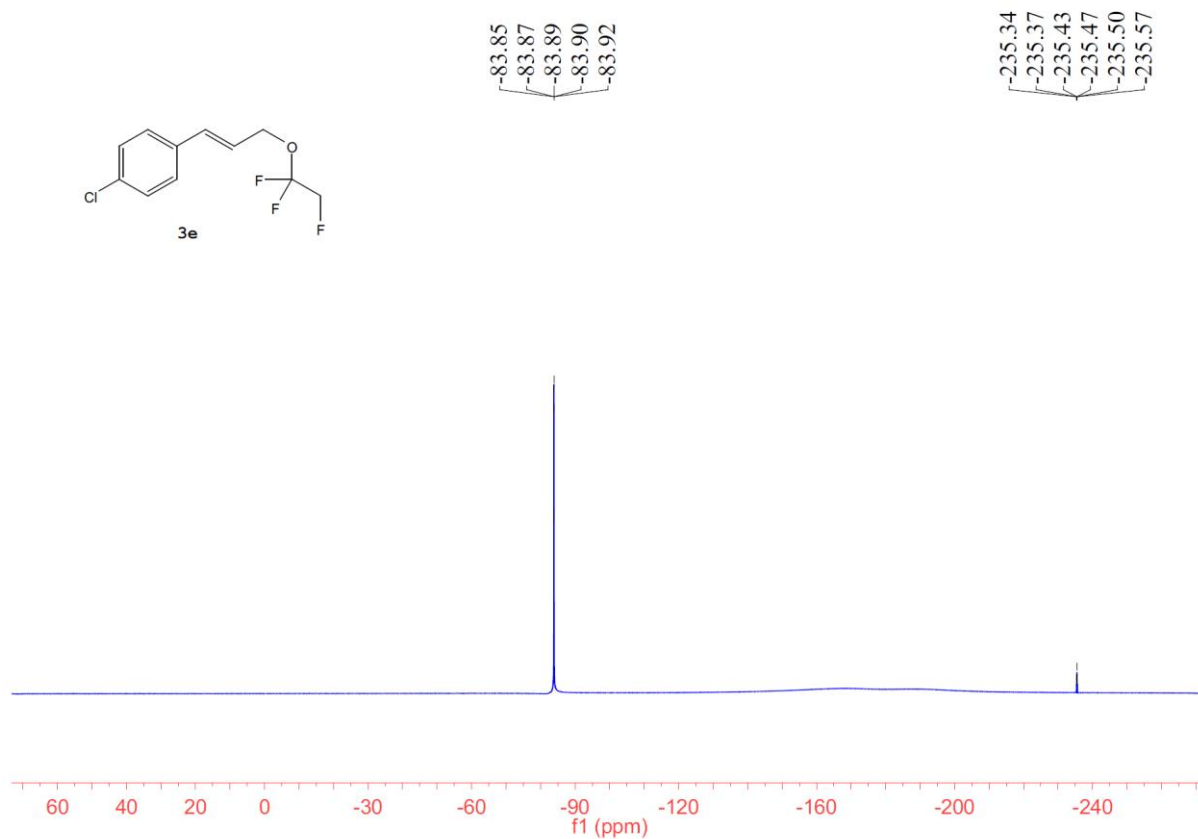

**<sup>19</sup>F NMR (CDCl<sub>3</sub>, 471 MHz) Spectrum of Compound 3e**



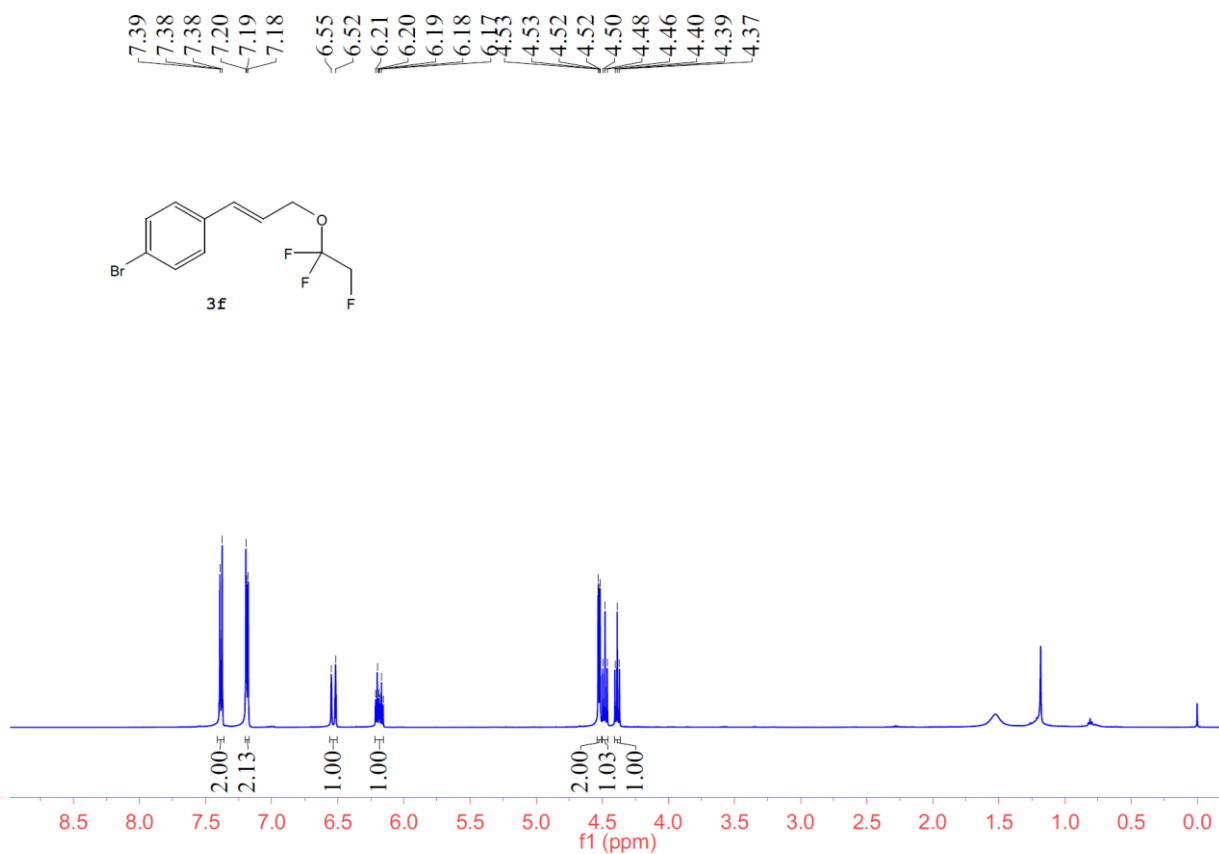

**<sup>1</sup>H NMR (CDCl<sub>3</sub>, 500 MHz) Spectrum of Compound 3f**

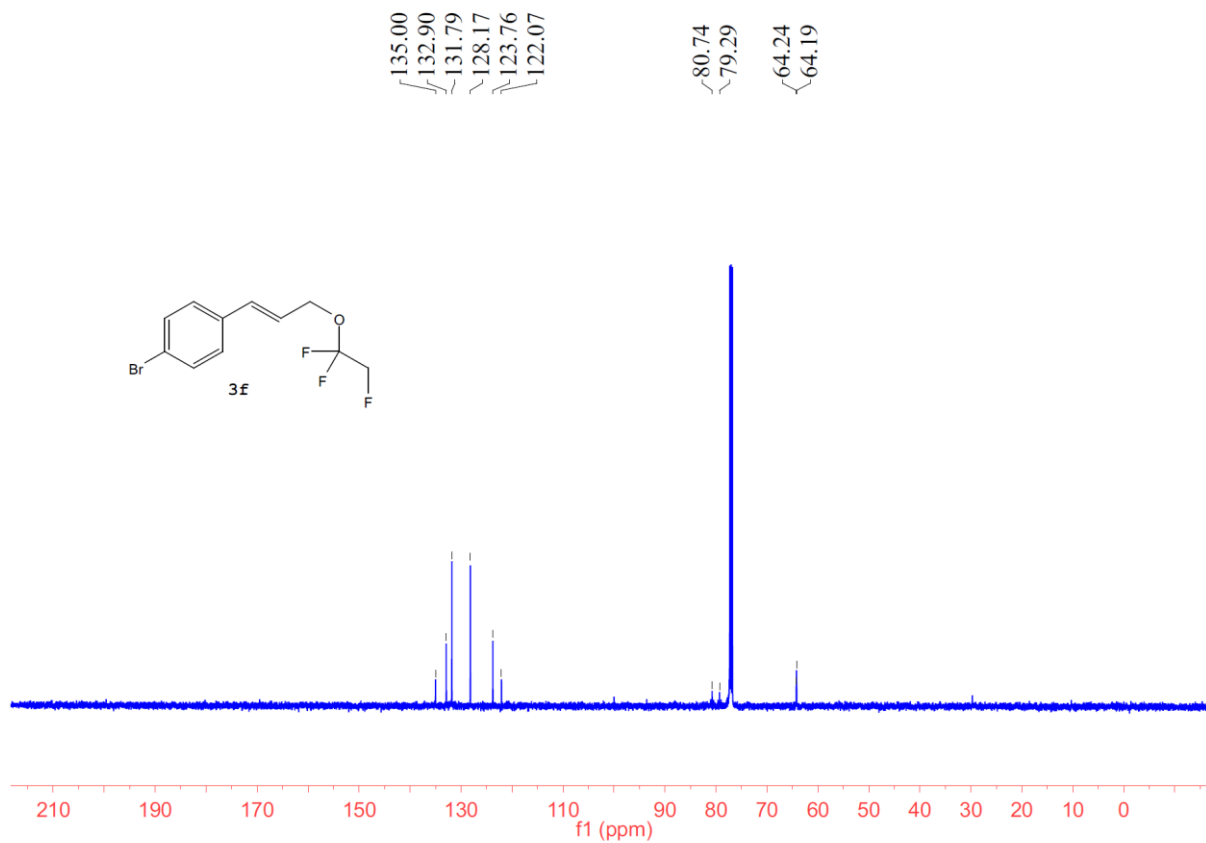

**<sup>13</sup>C NMR (CDCl<sub>3</sub>, 126 MHz) Spectrum of Compound 3f**

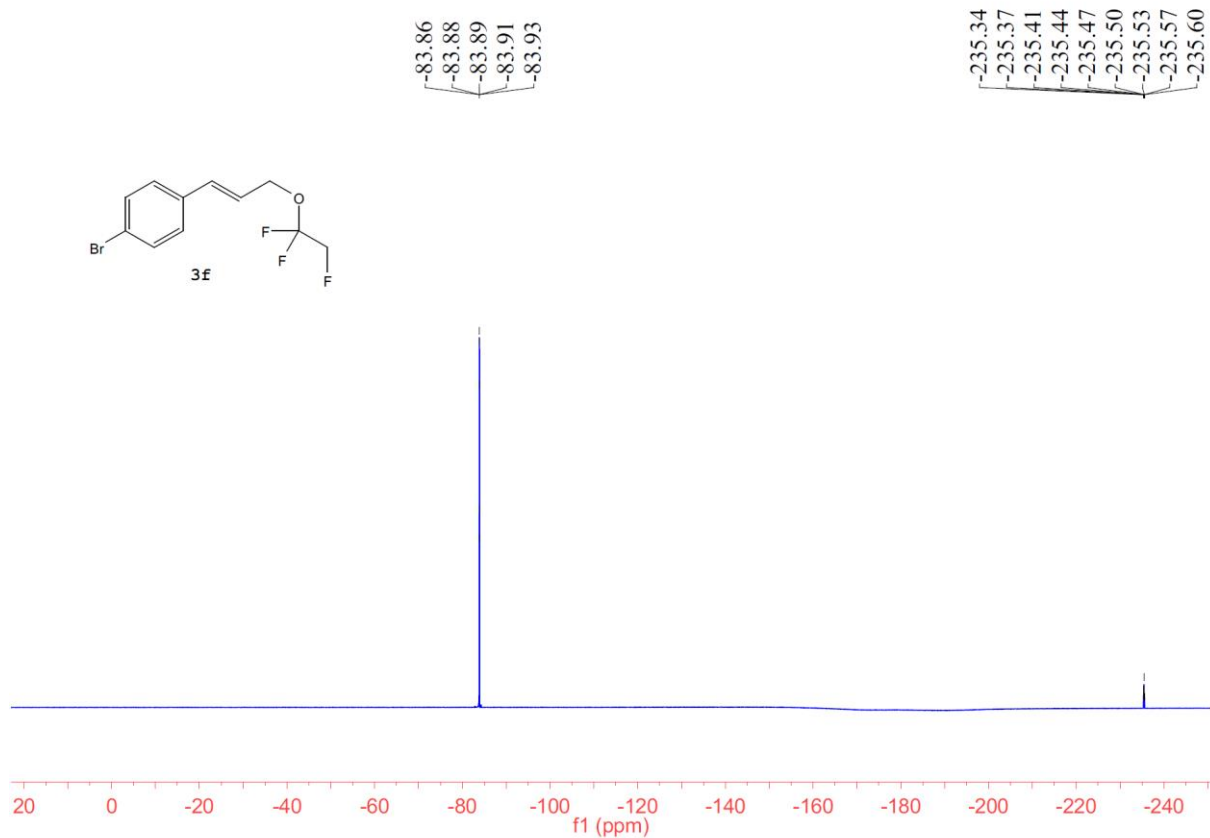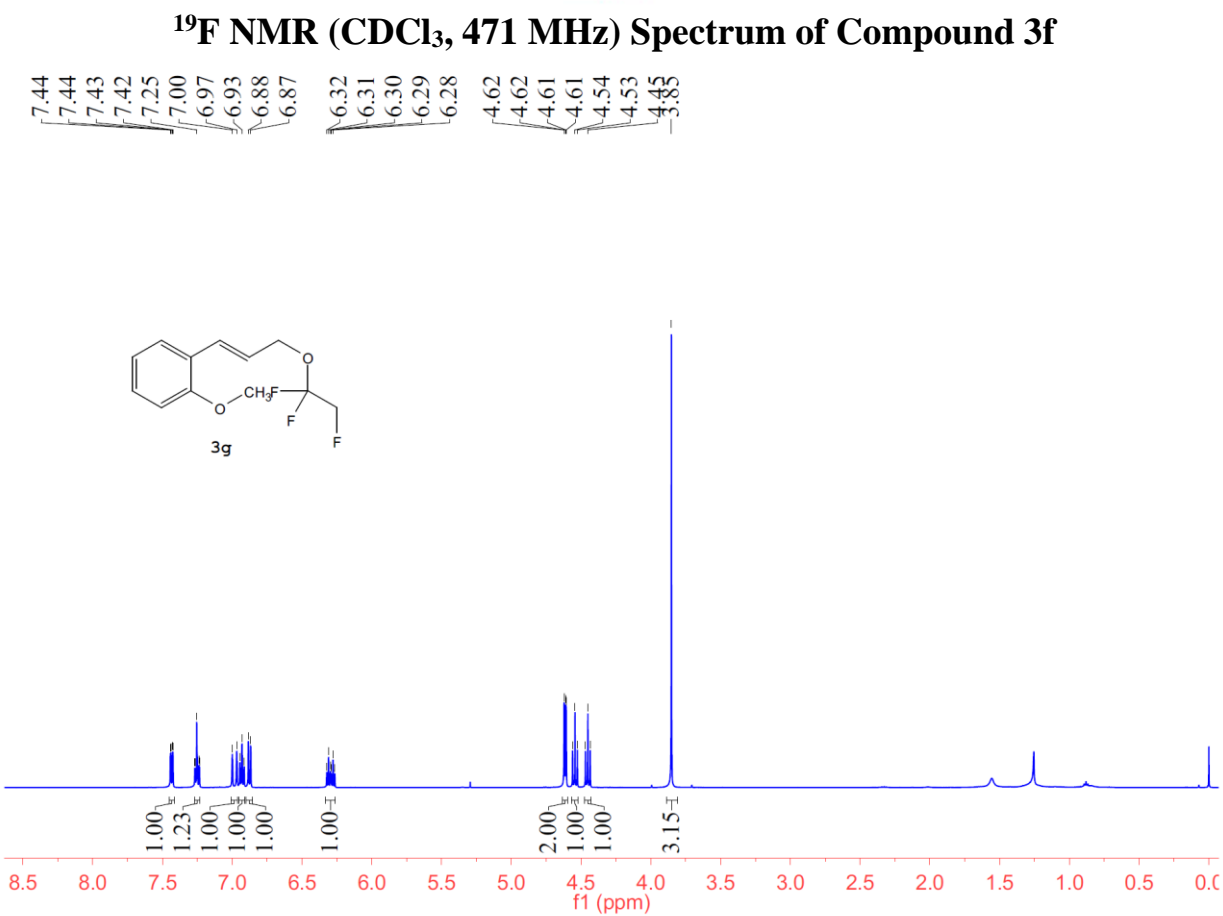

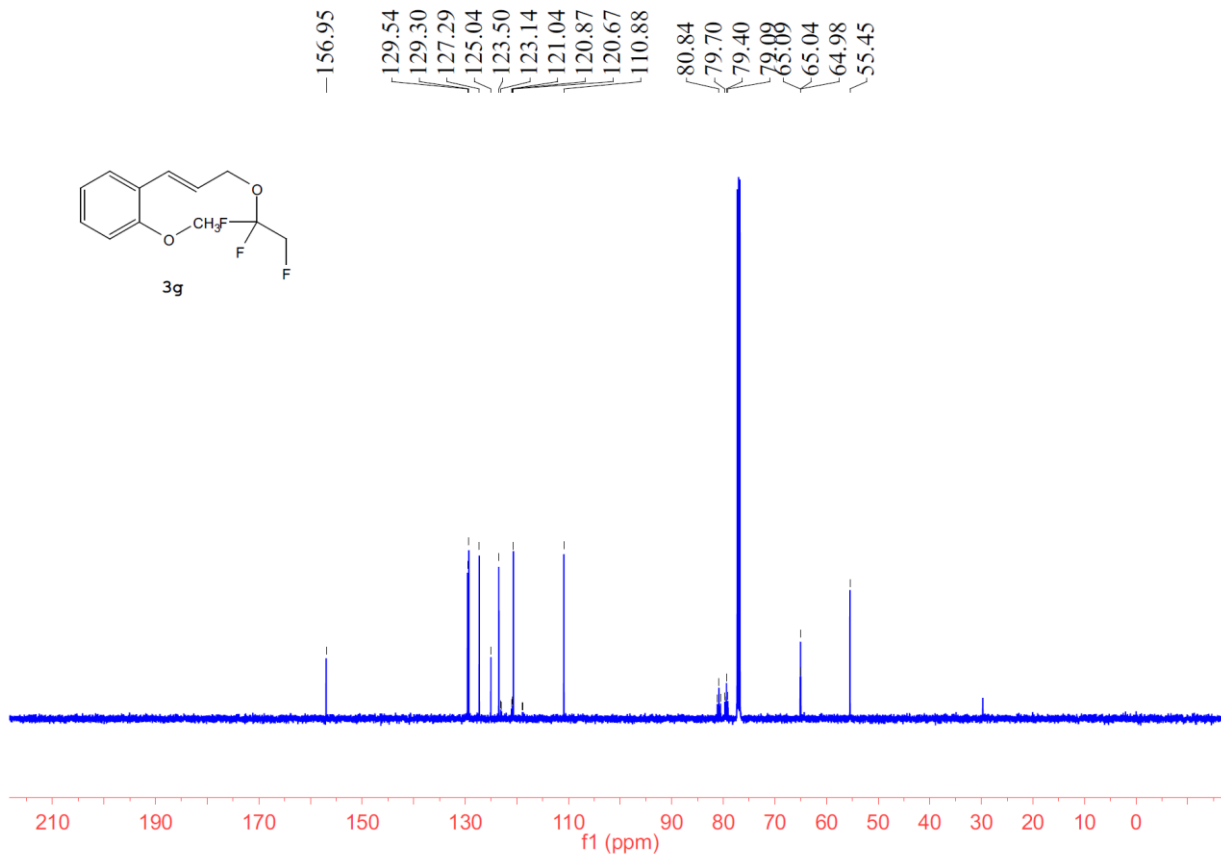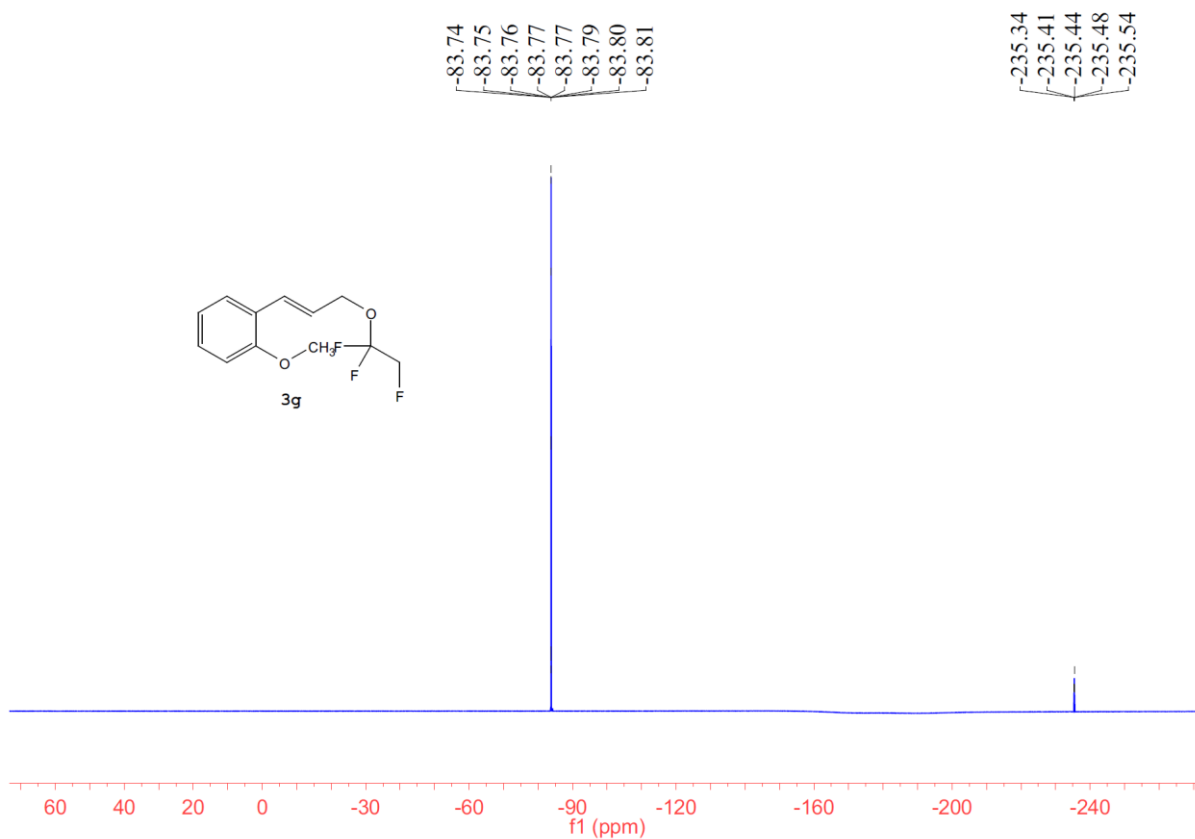

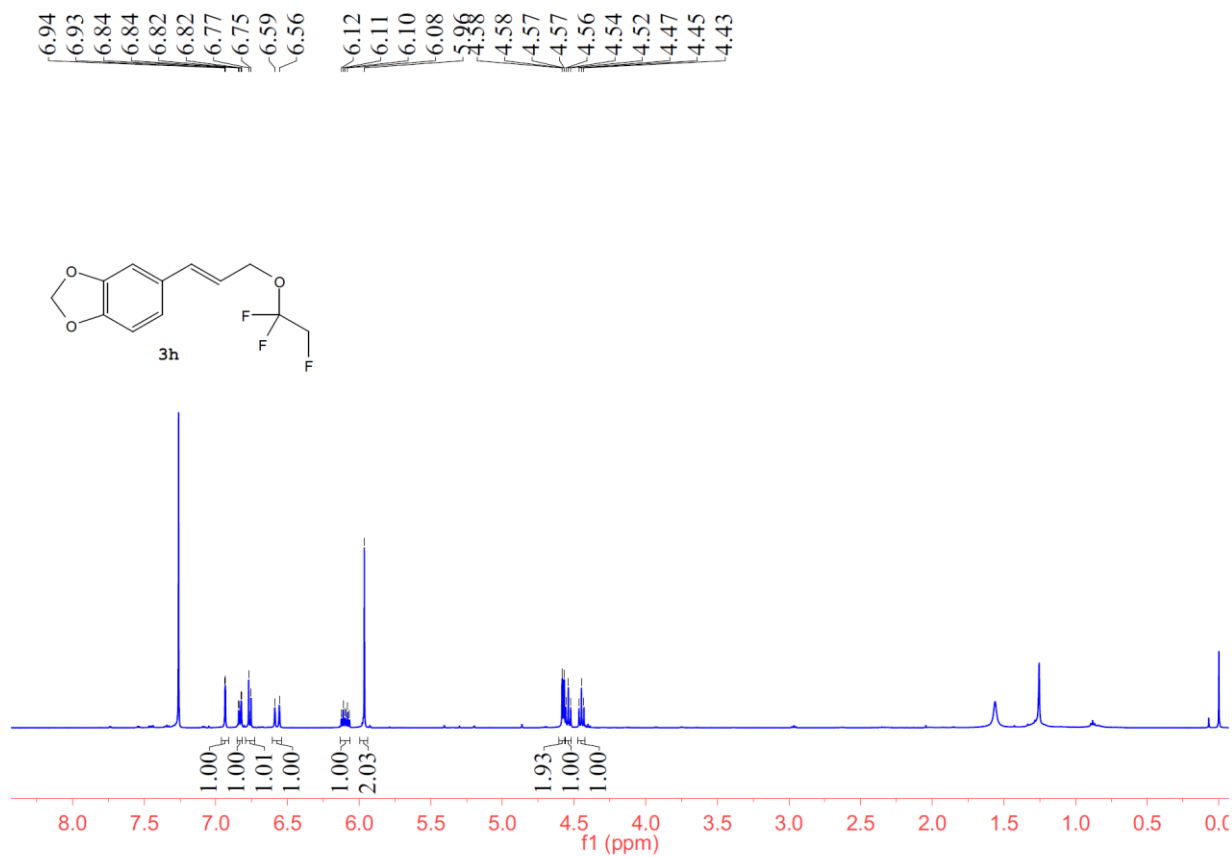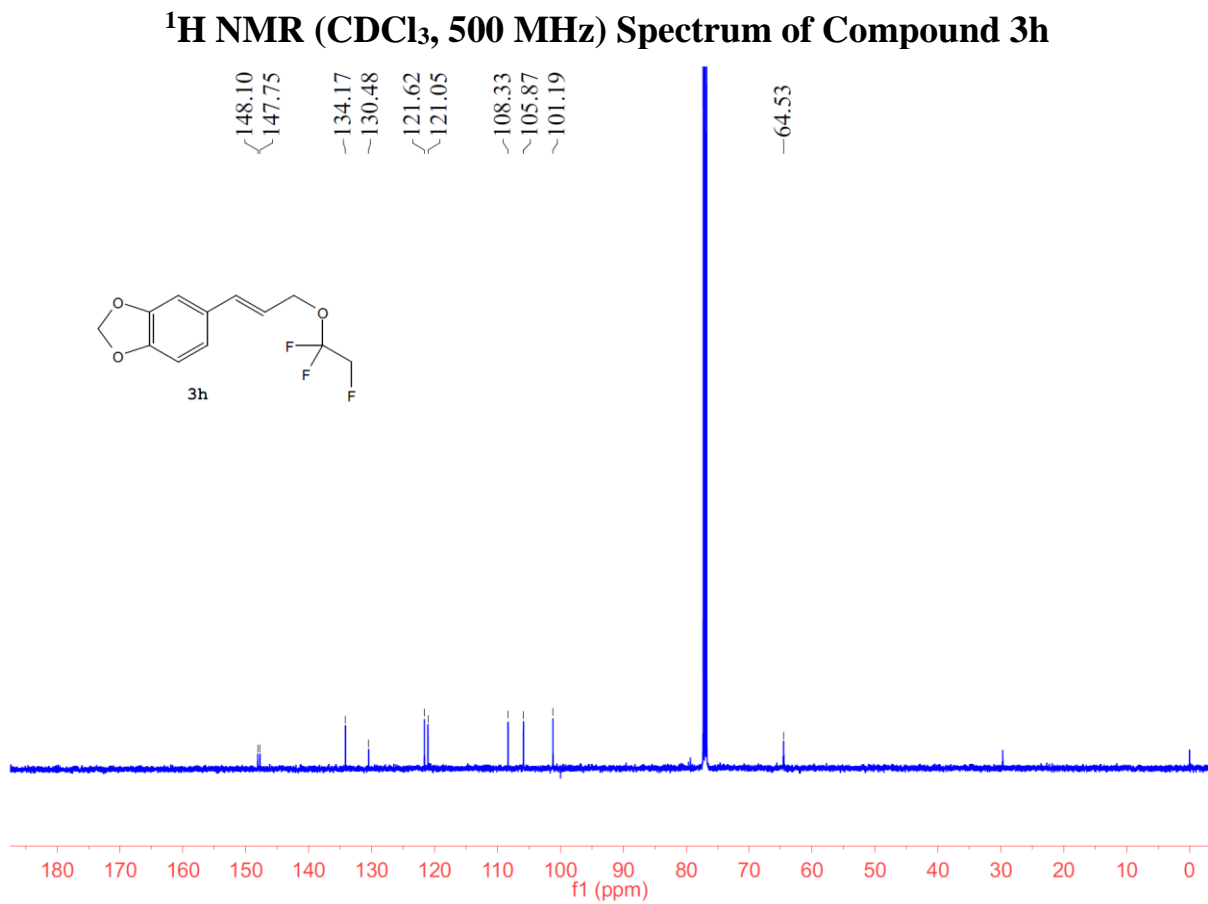

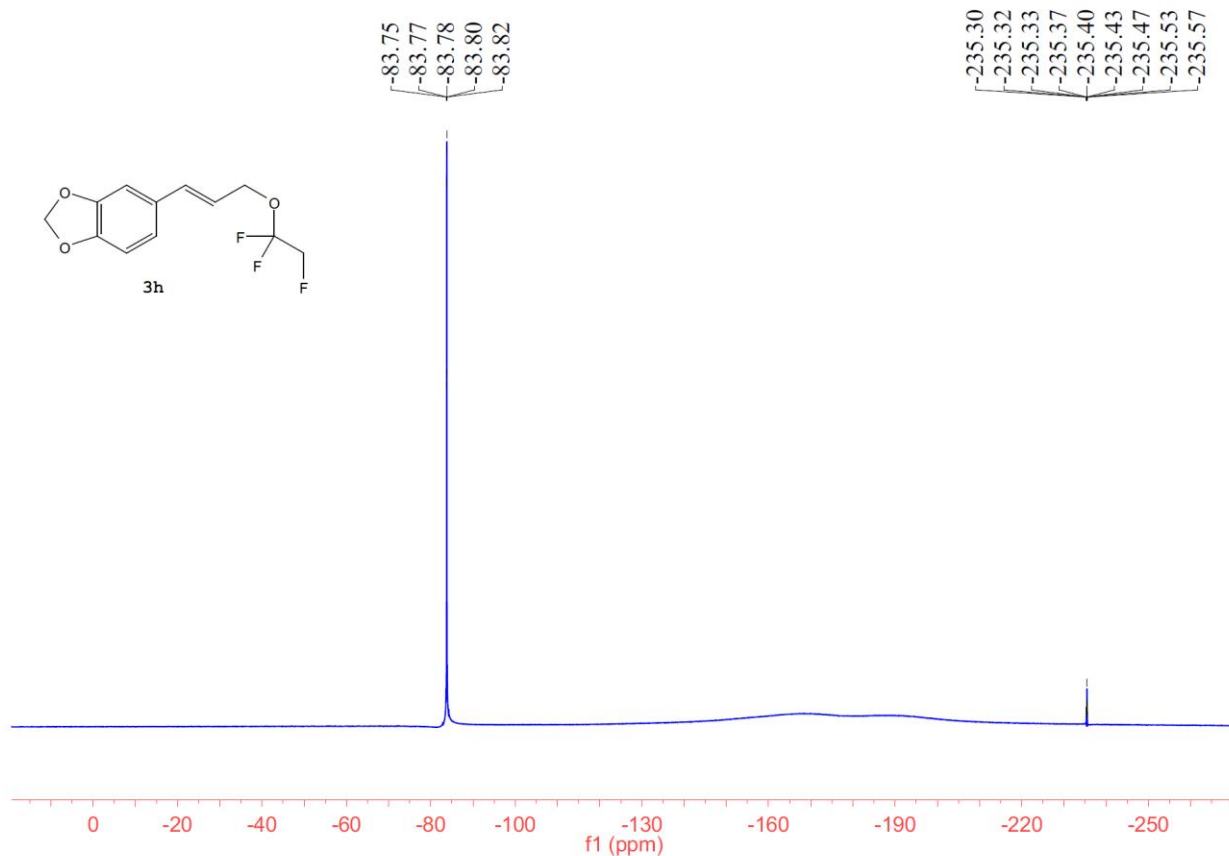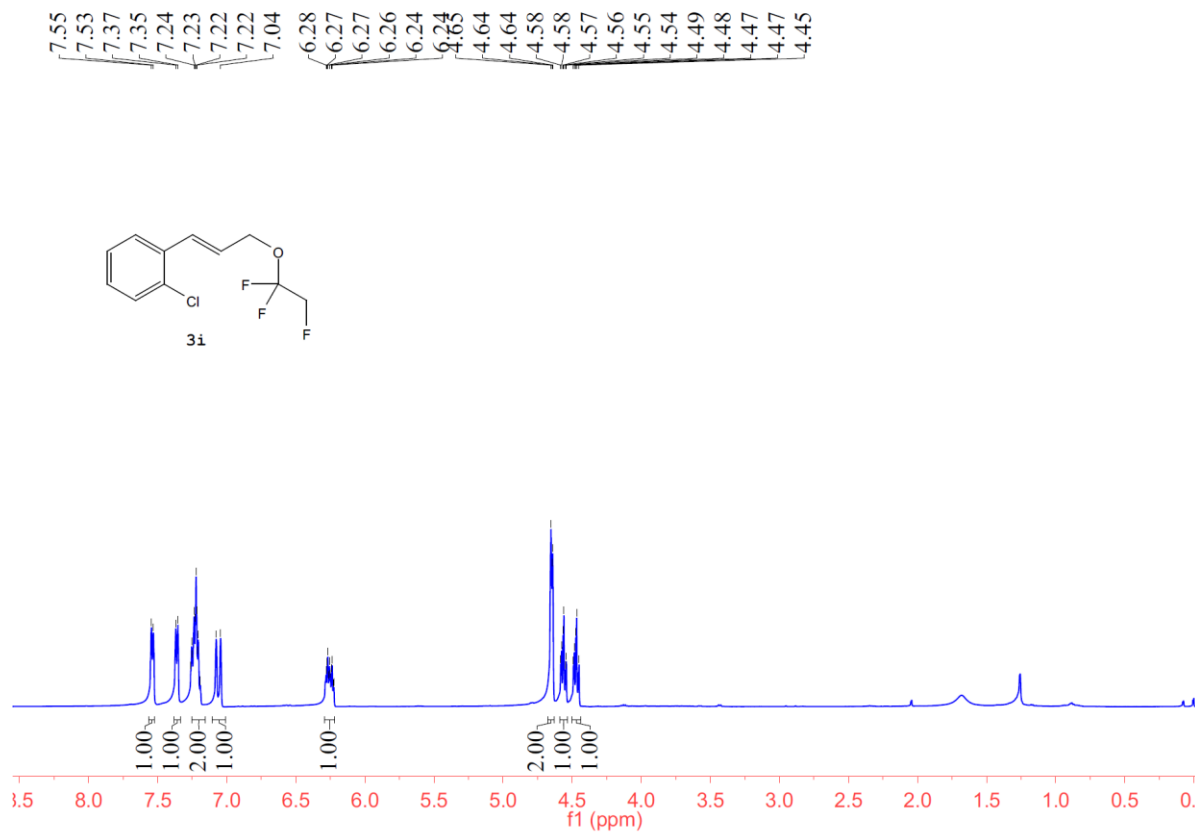

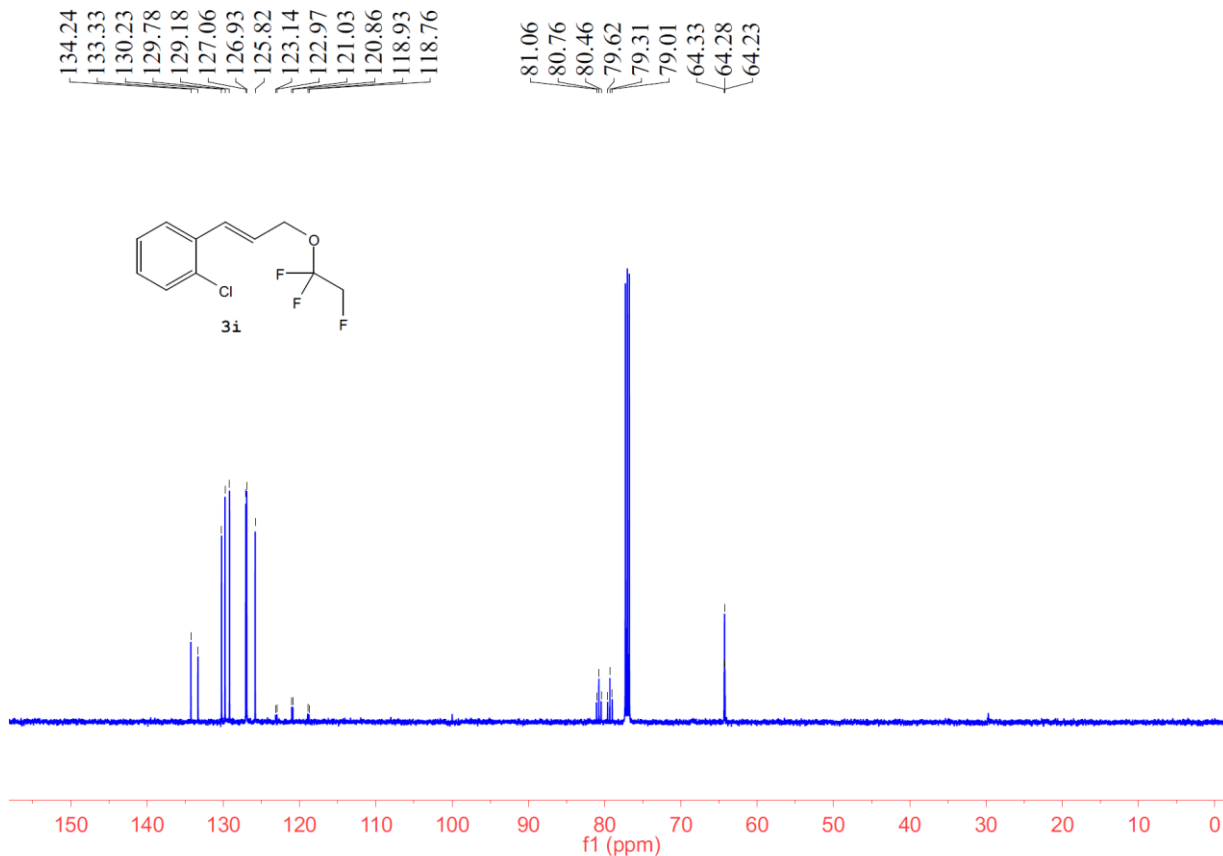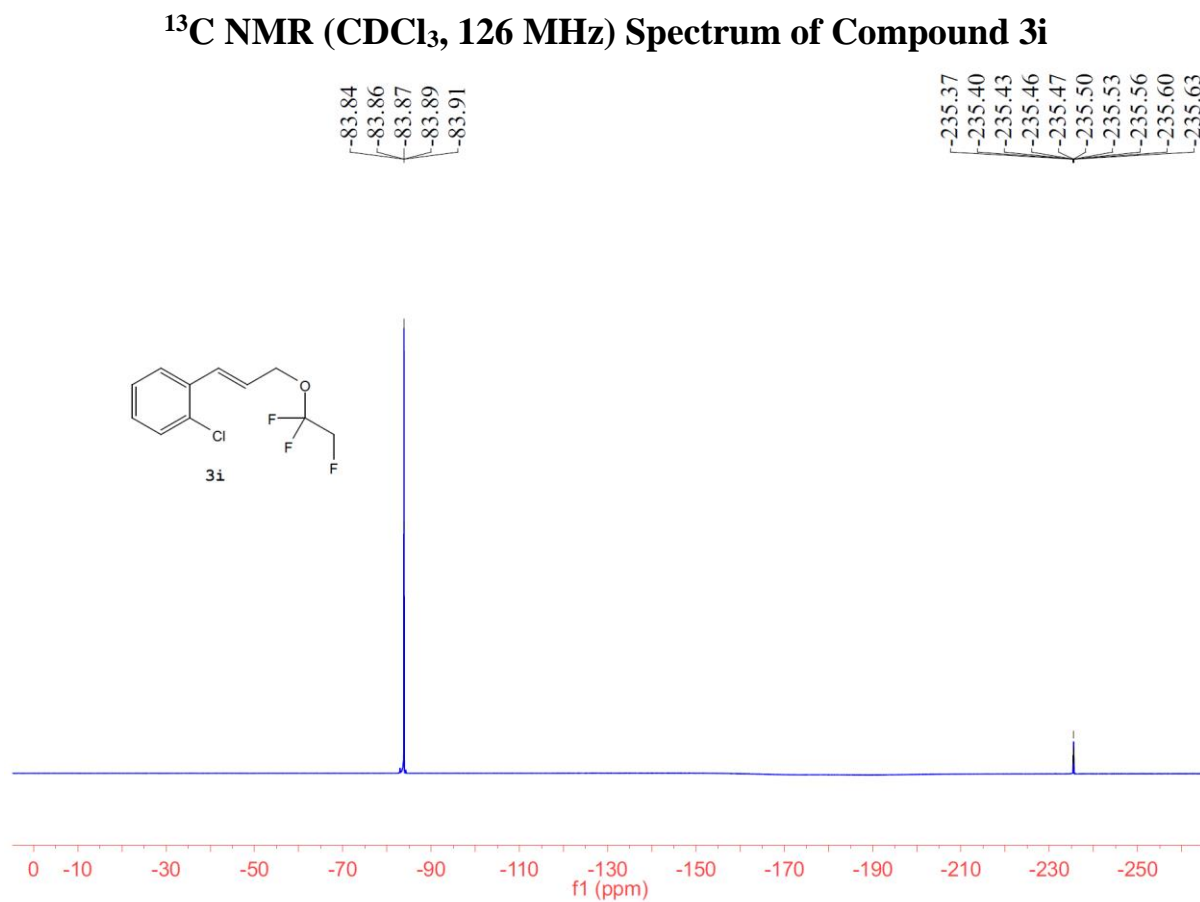

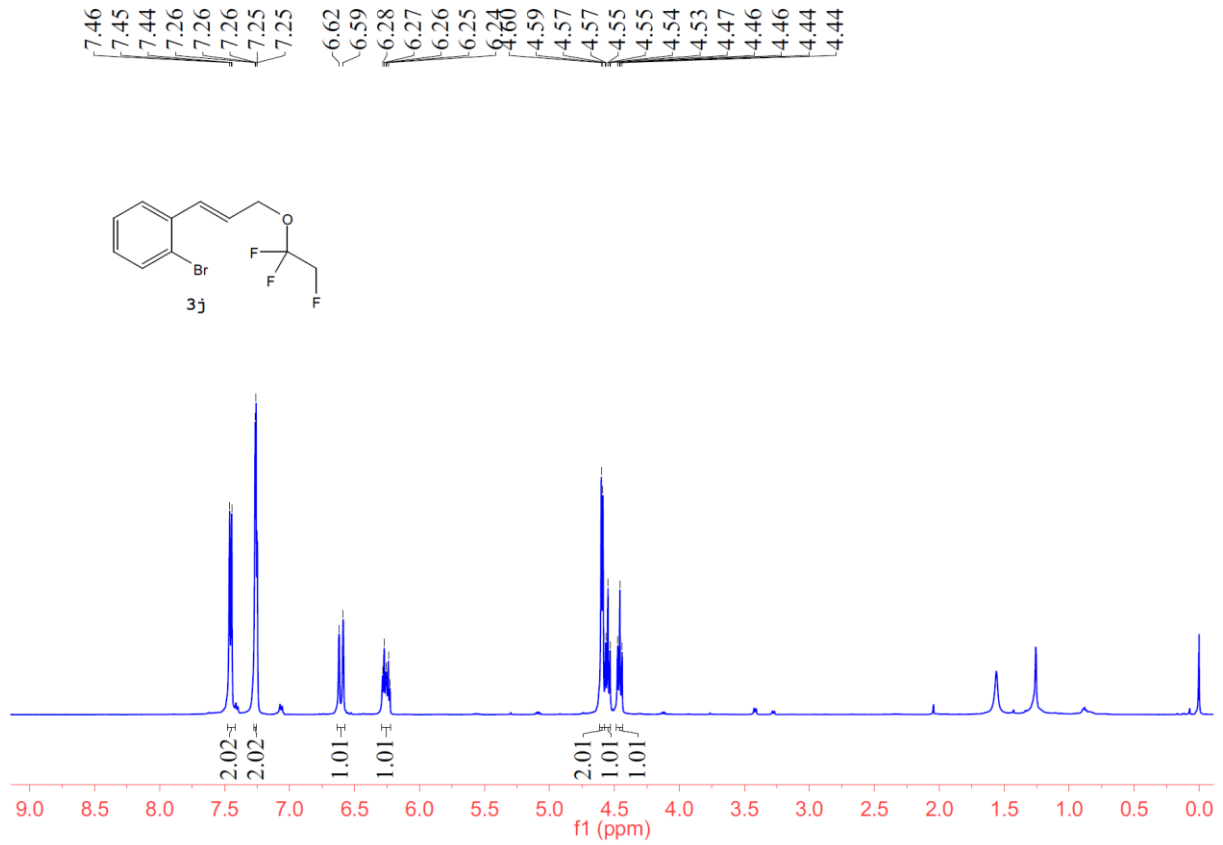

**<sup>1</sup>H NMR (CDCl<sub>3</sub>, 500 MHz) Spectrum of Compound 3j**

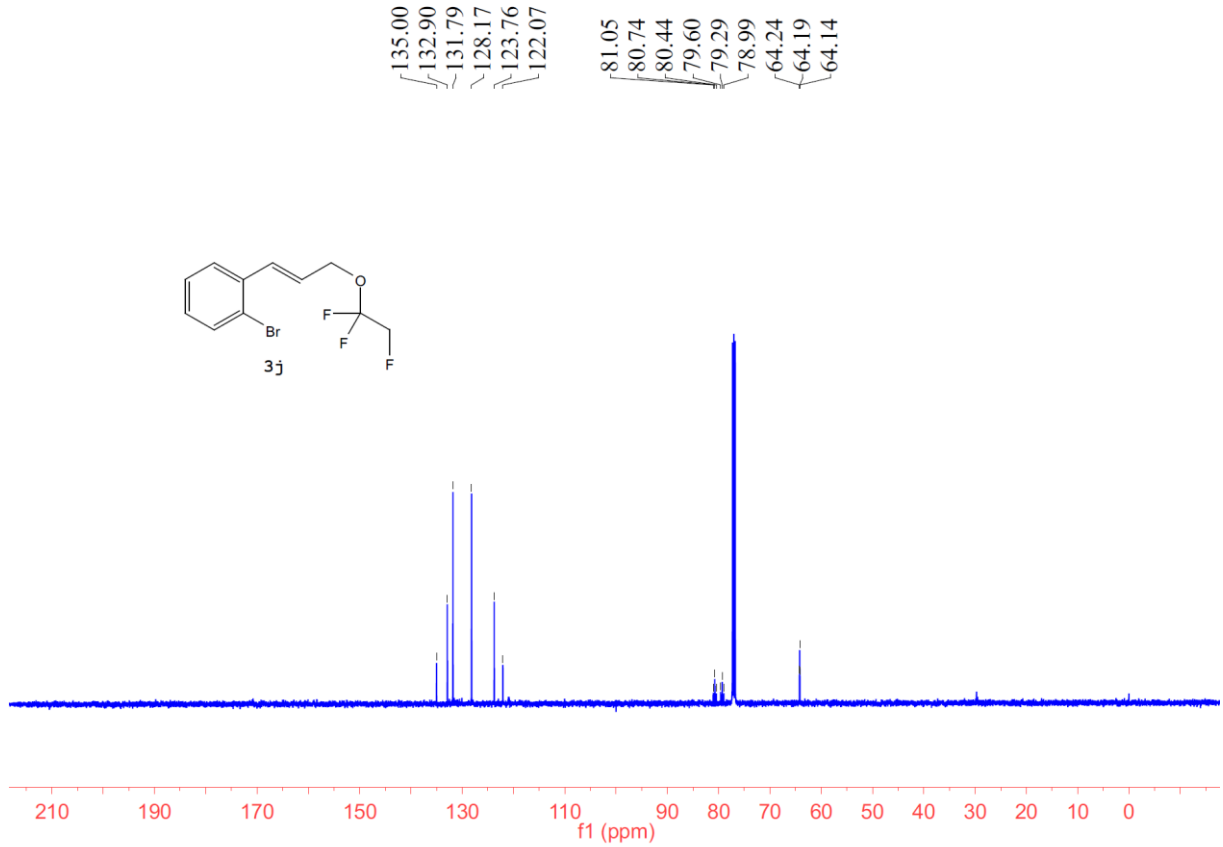

**<sup>13</sup>C NMR (CDCl<sub>3</sub>, 126 MHz) Spectrum of Compound 3j**

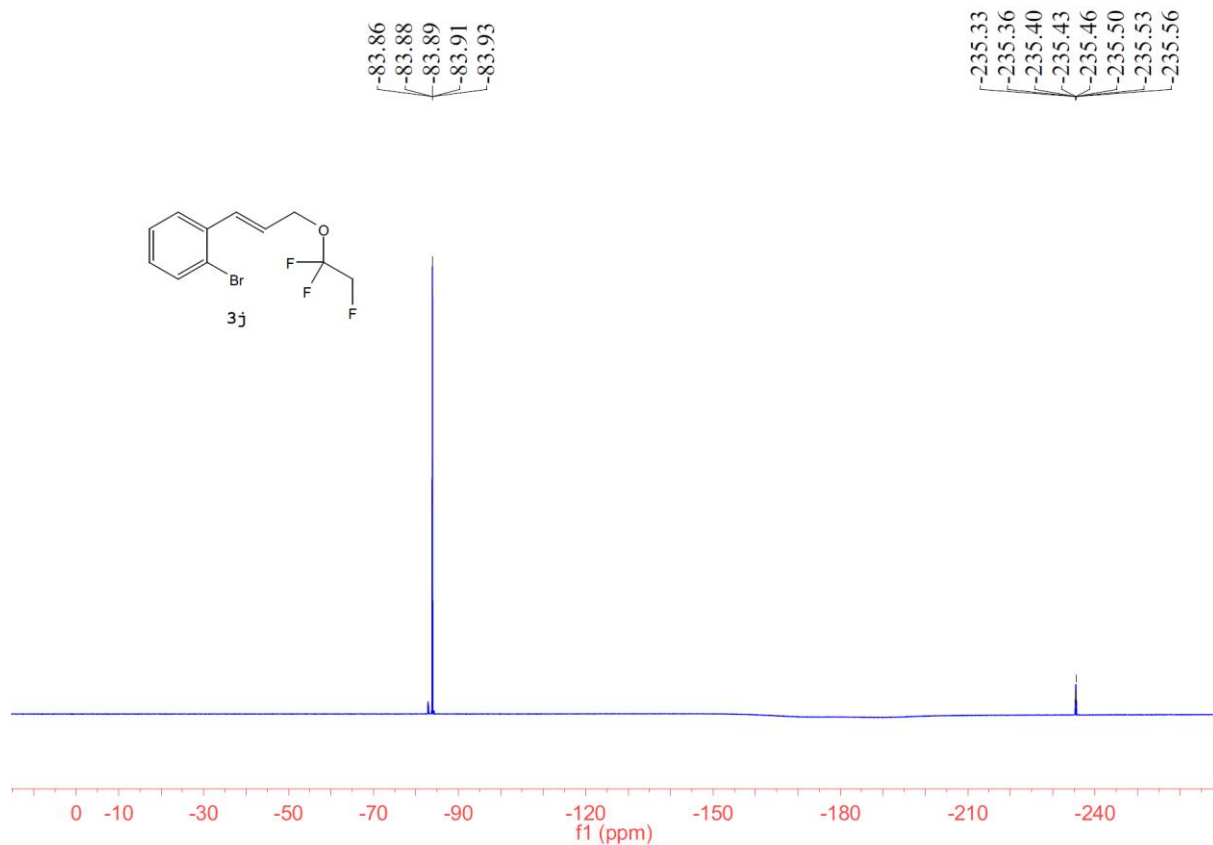

**$^{19}\text{F}$  NMR (CDCl<sub>3</sub>, 471 MHz) Spectrum of Compound 3j**

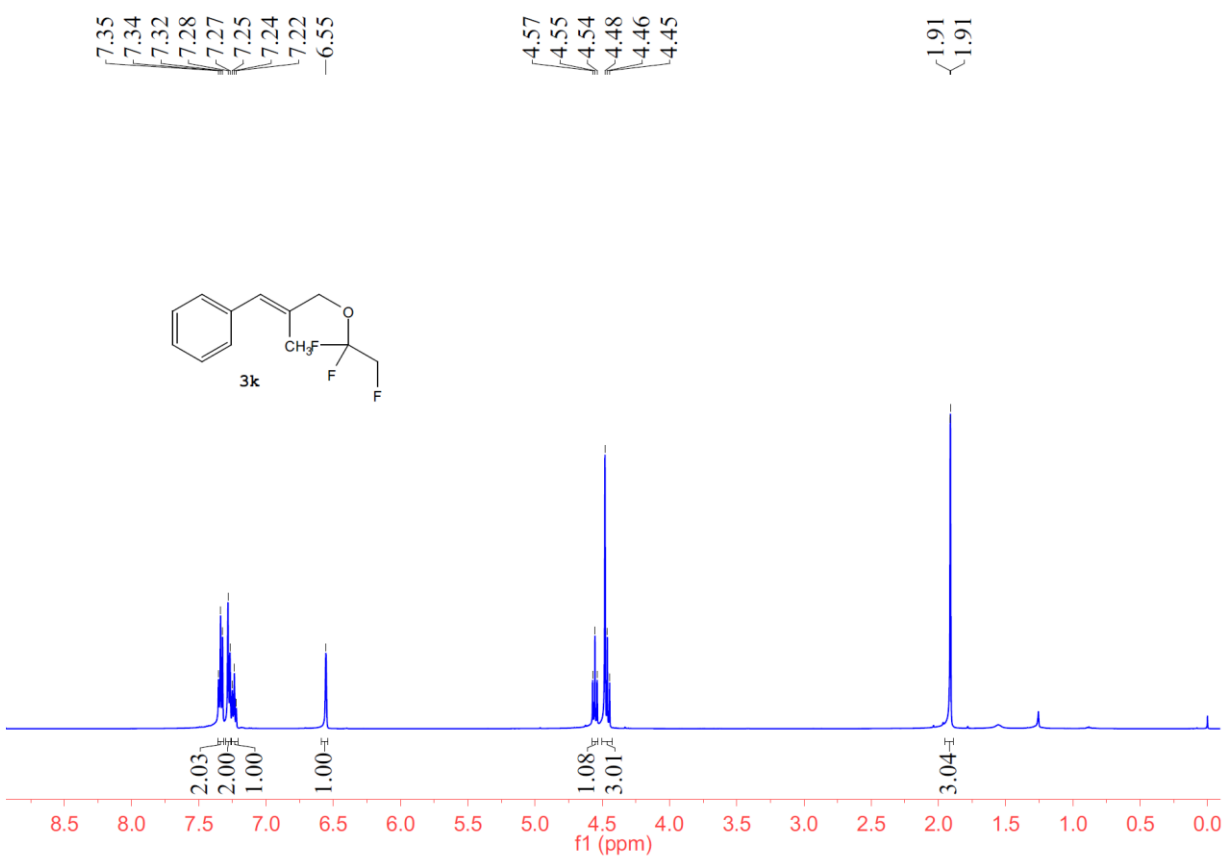

**$^1\text{H}$  NMR (CDCl<sub>3</sub>, 500 MHz) Spectrum of Compound 3k**



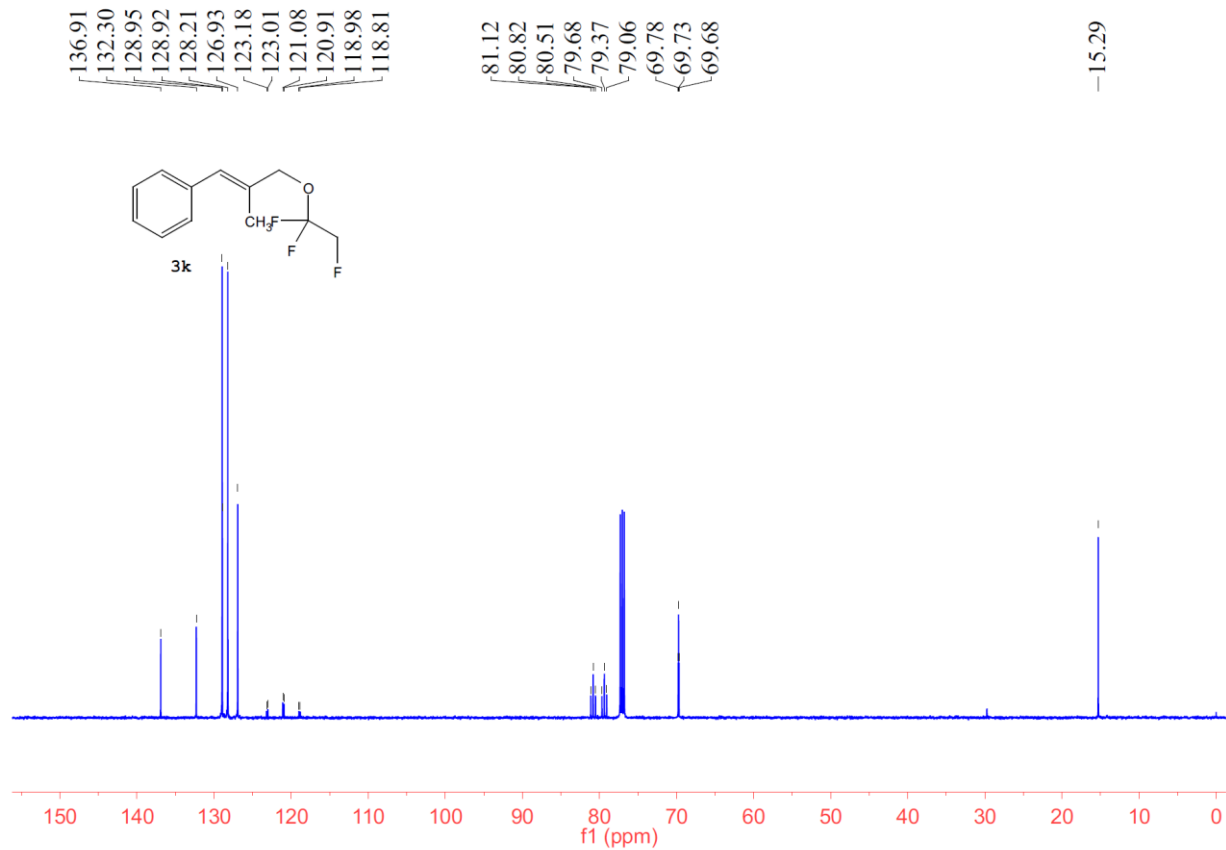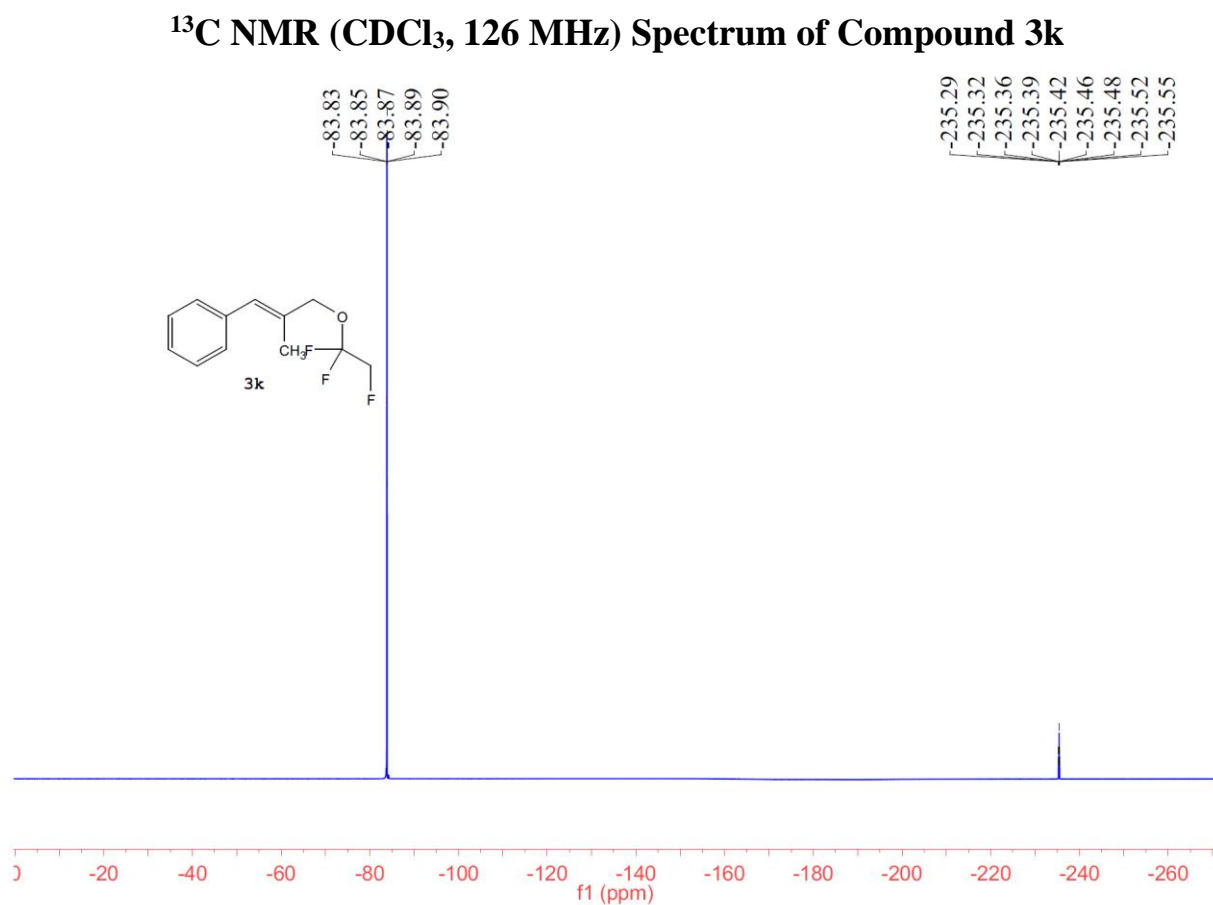

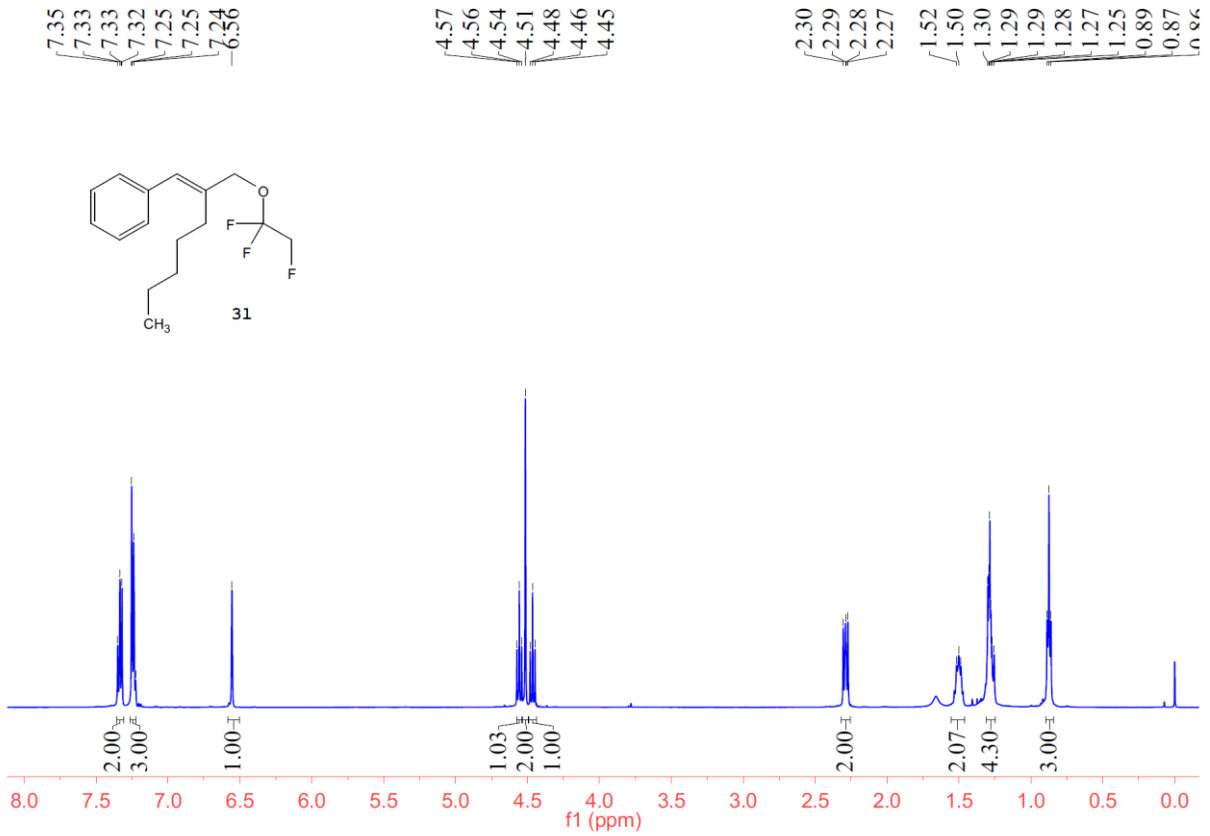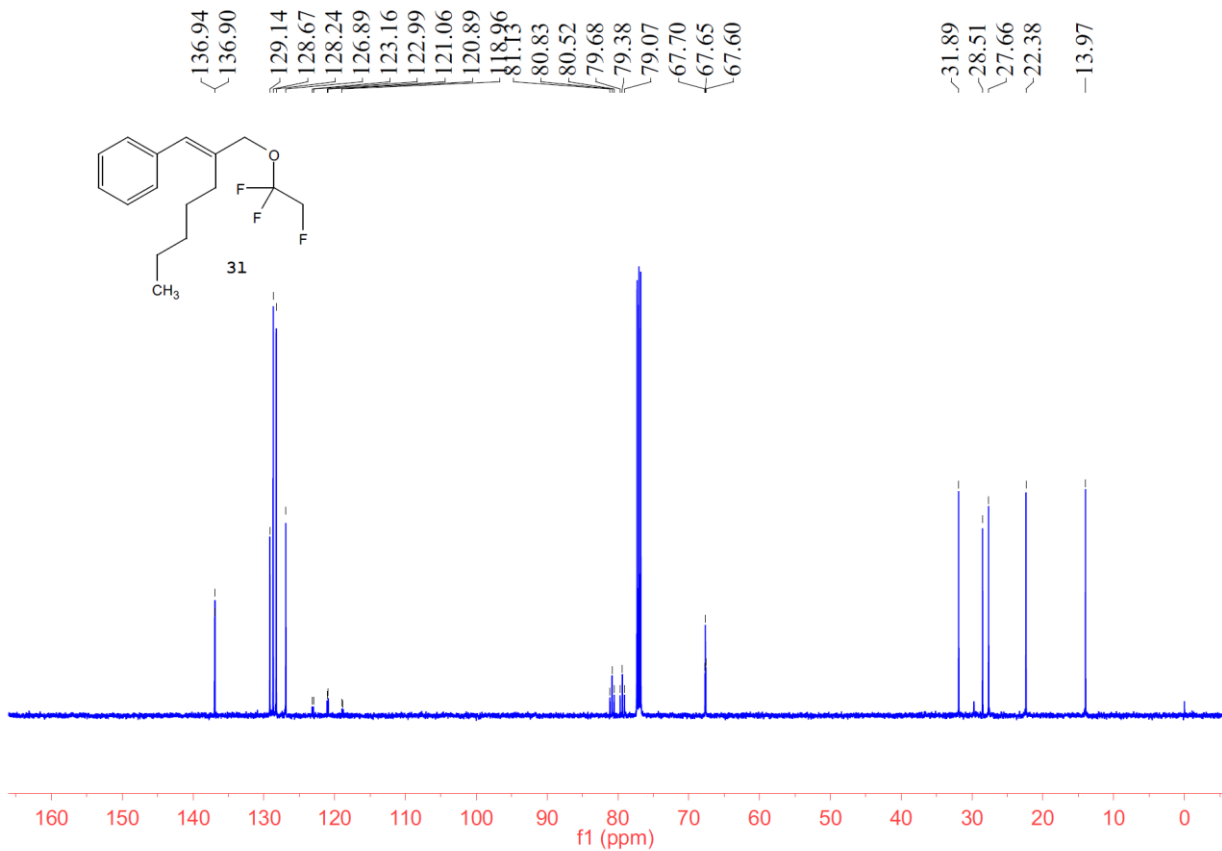

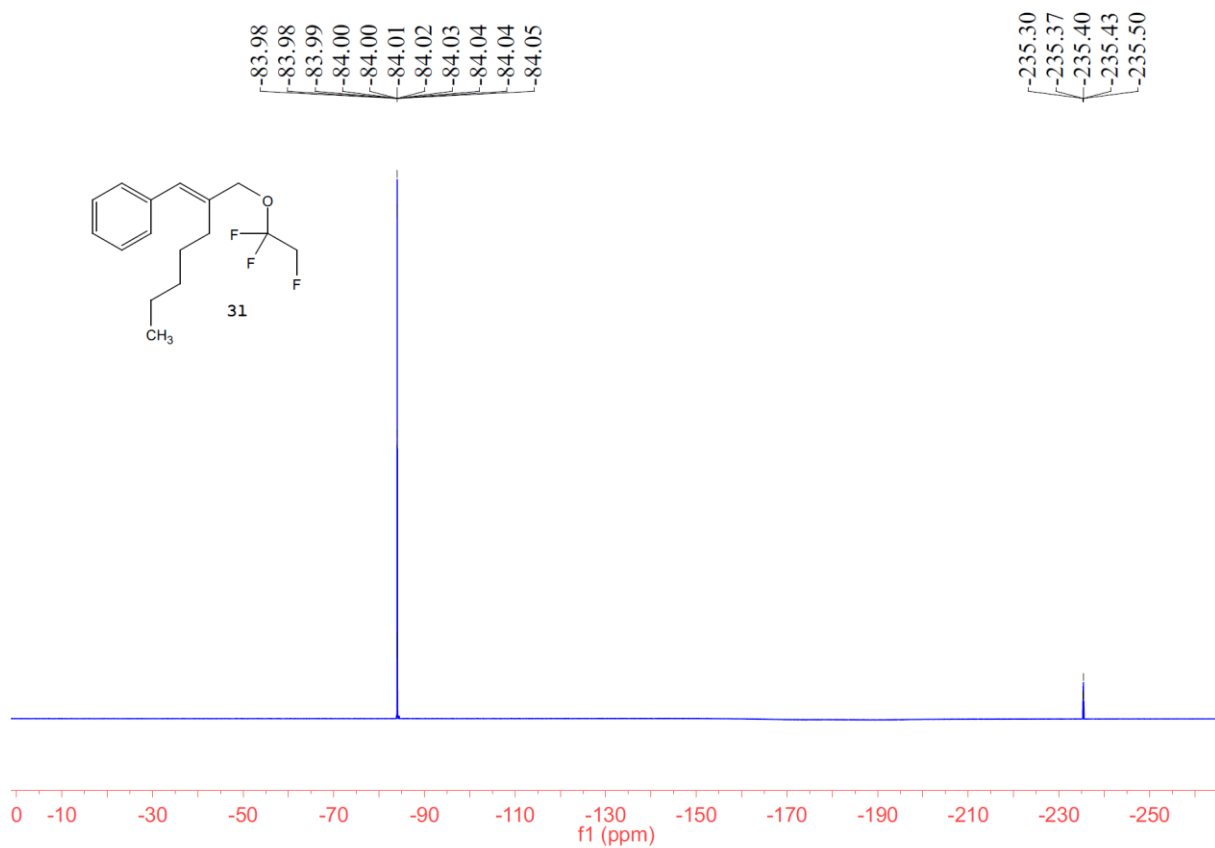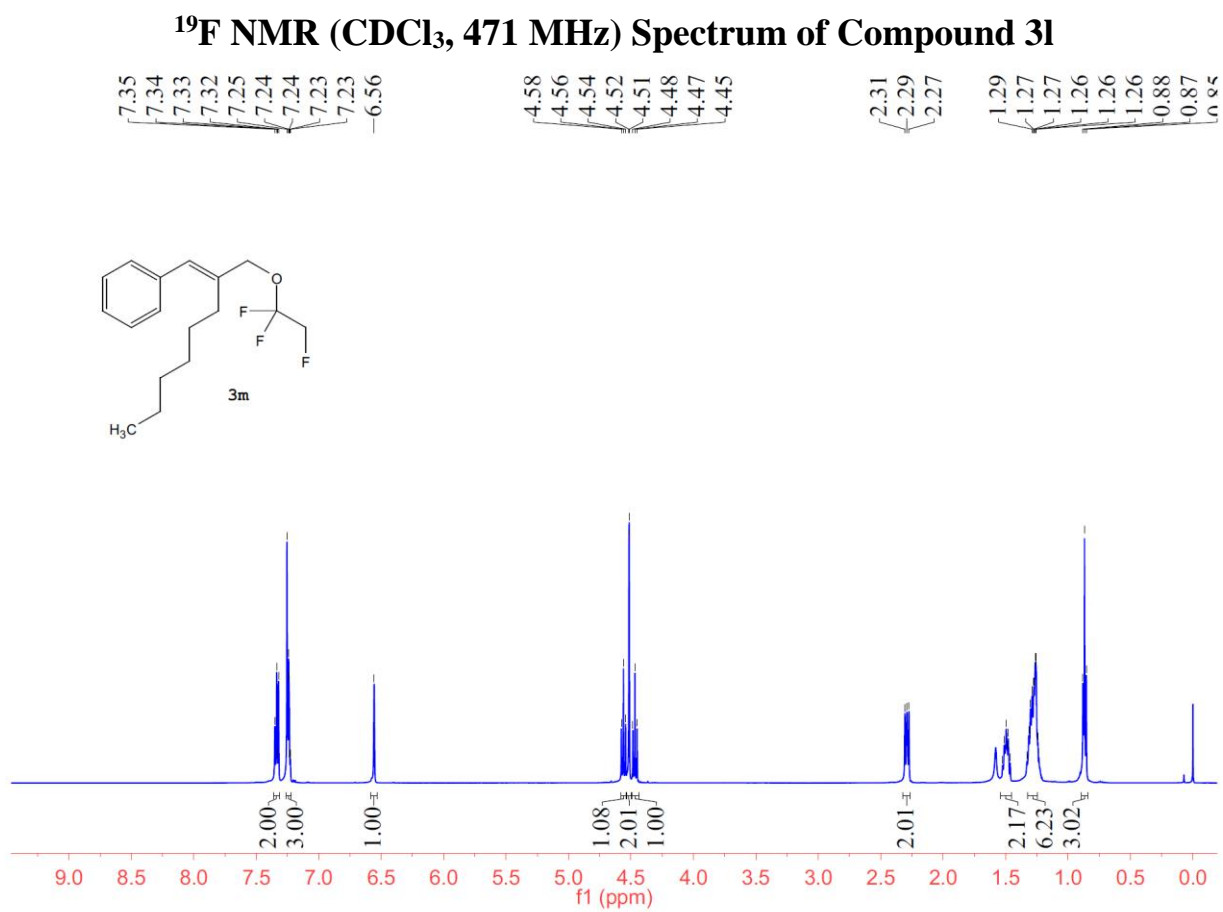

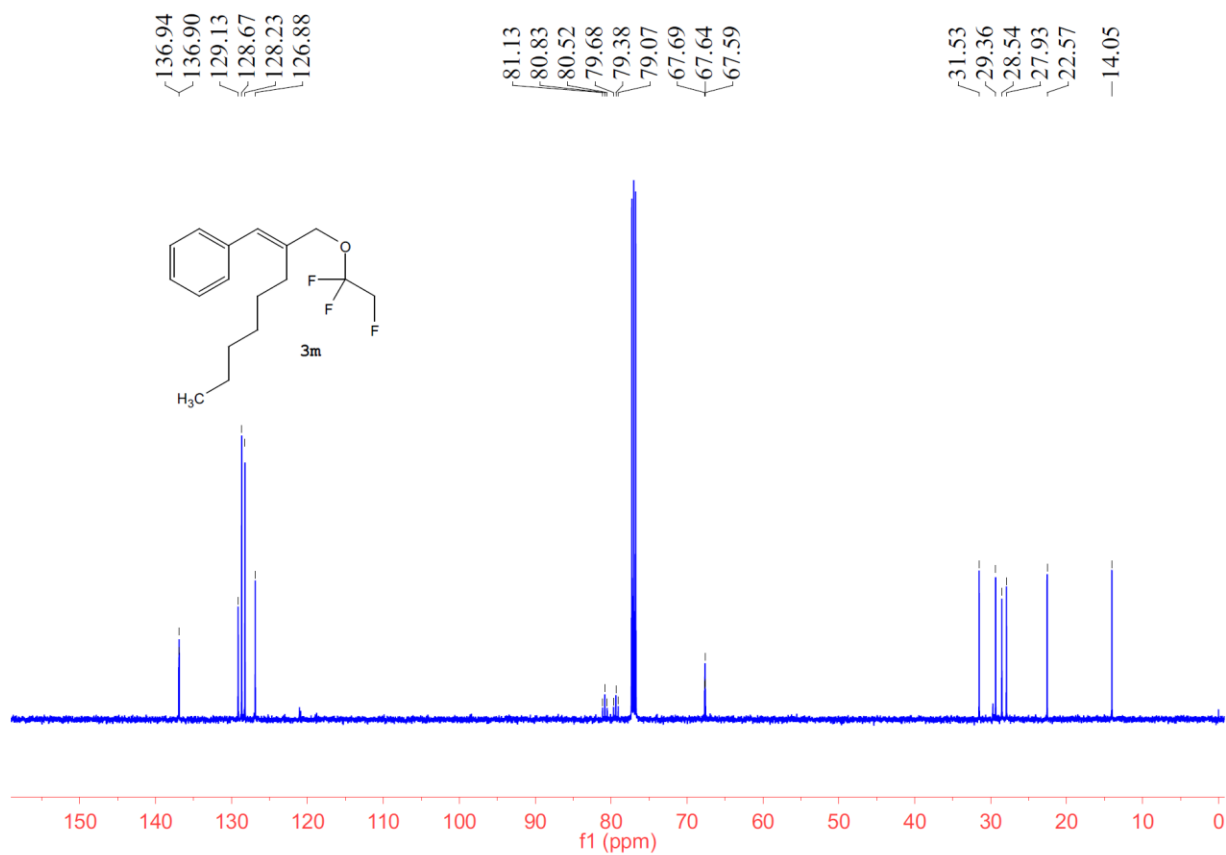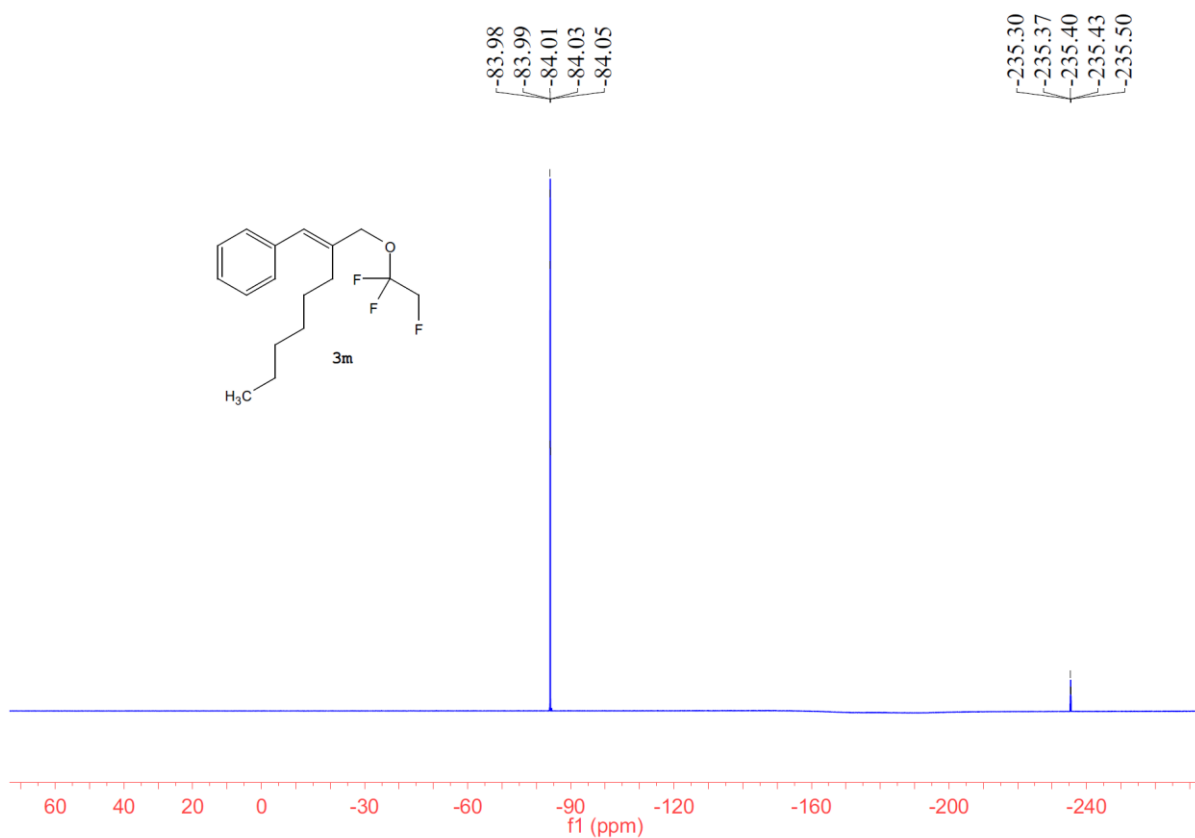

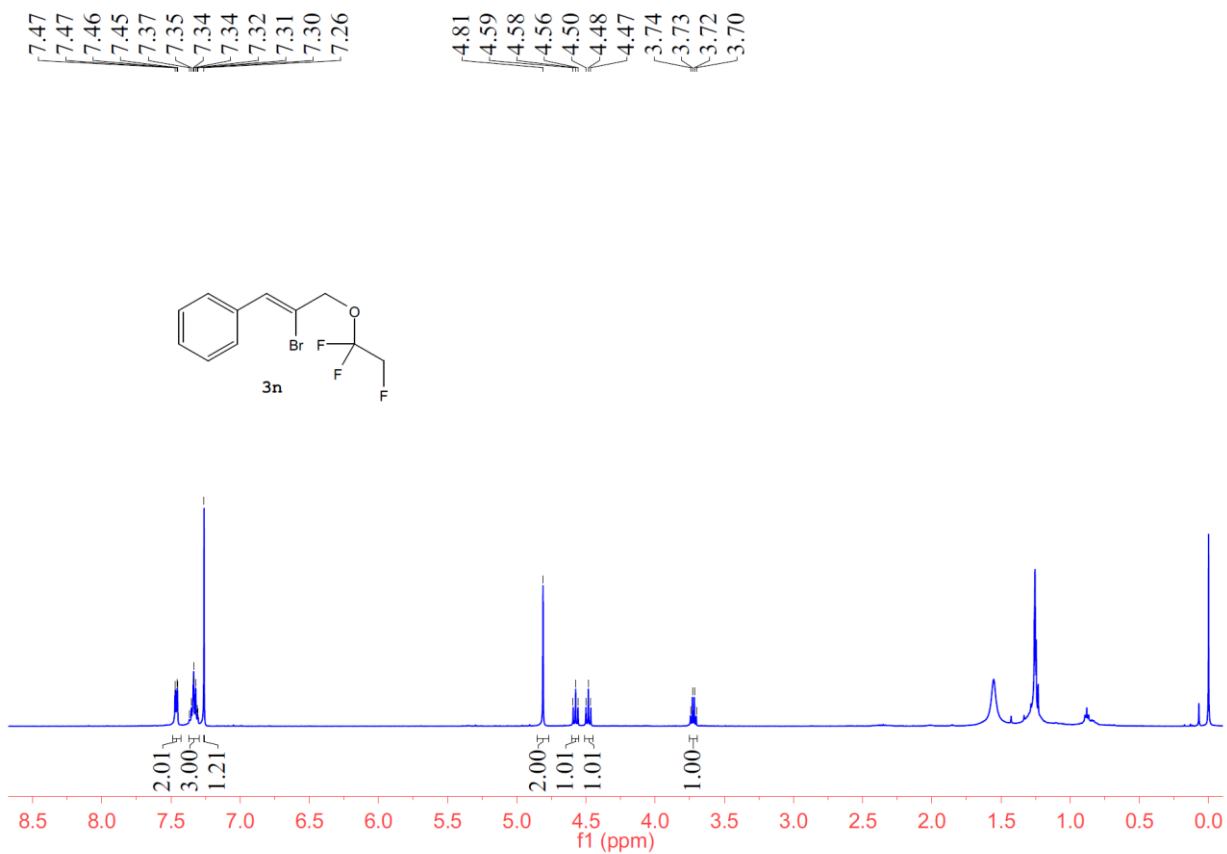

**<sup>1</sup>H NMR (CDCl<sub>3</sub>, 500 MHz) Spectrum of Compound 3n**

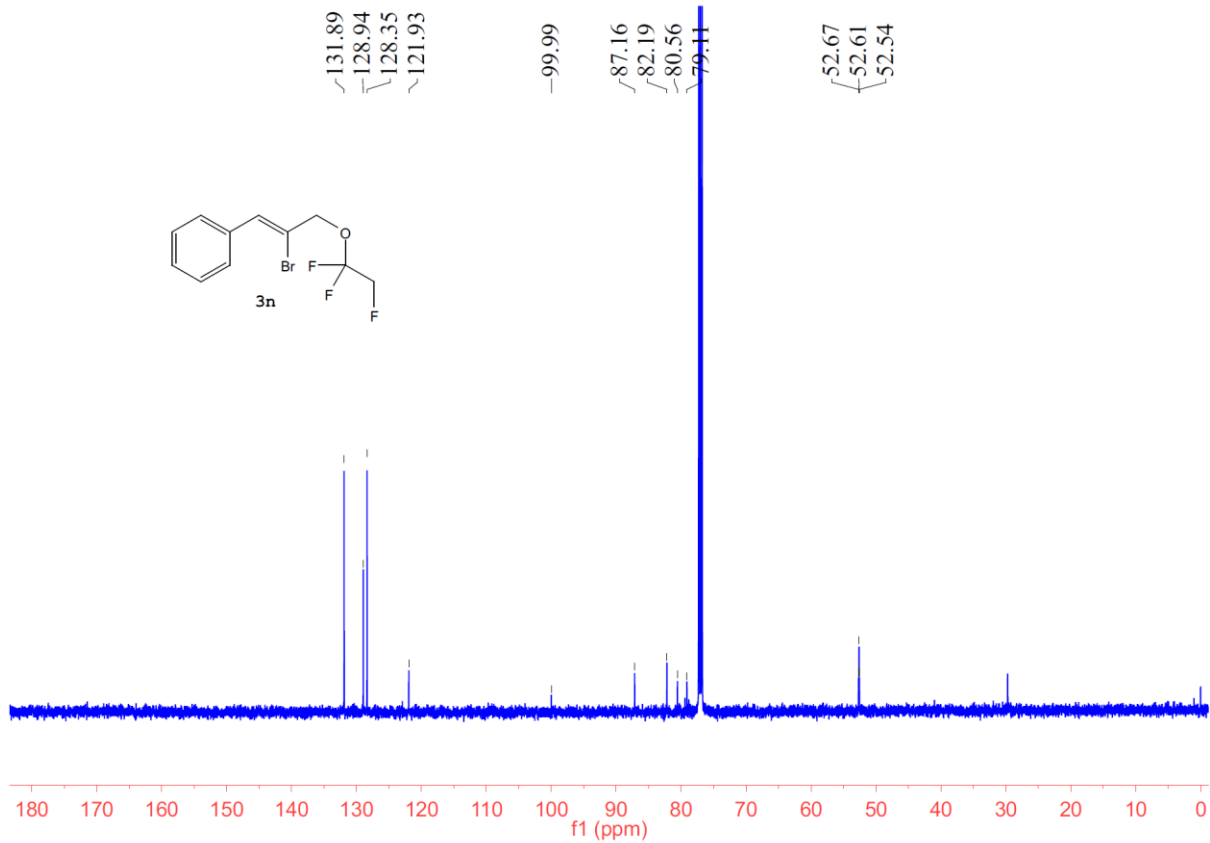

**<sup>13</sup>C NMR (CDCl<sub>3</sub>, 126 MHz) Spectrum of Compound 3n**

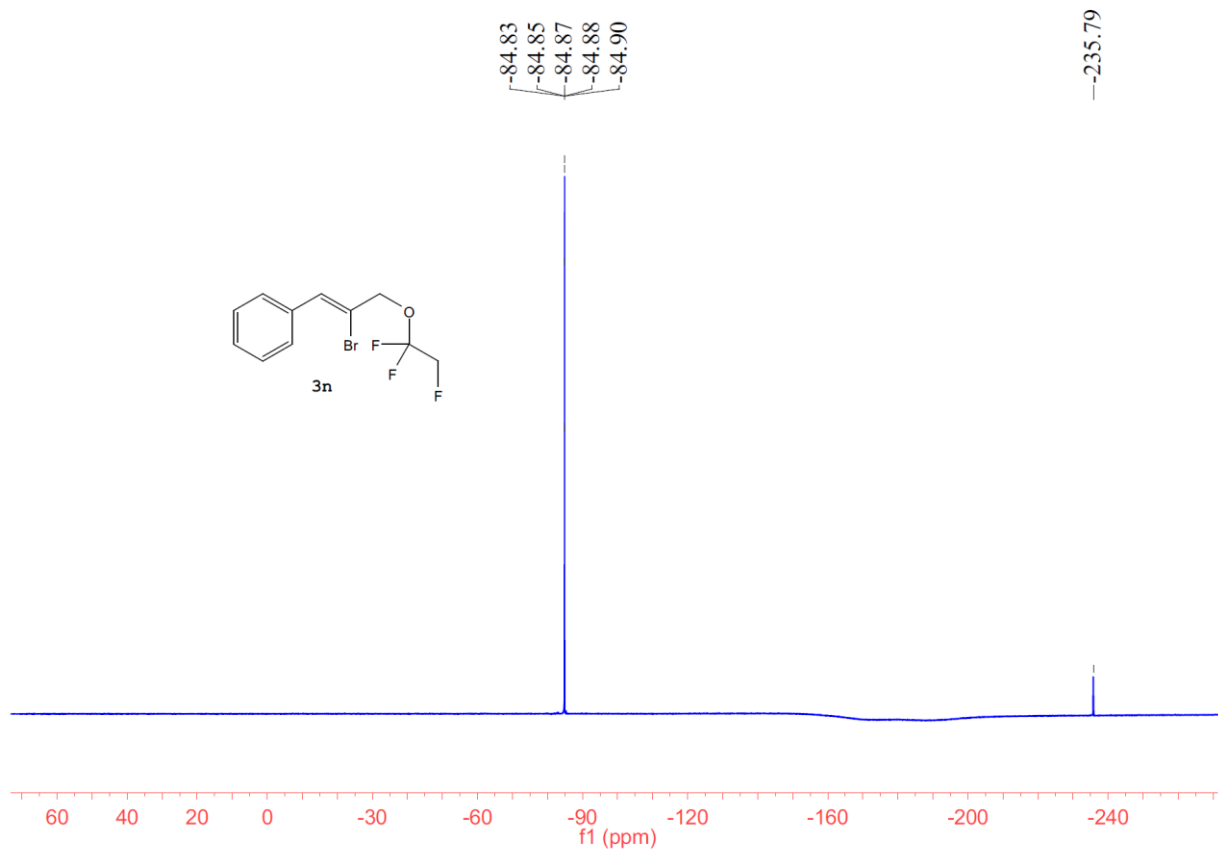

**<sup>19</sup>F NMR (CDCl<sub>3</sub>, 471 MHz) Spectrum of Compound 3n**
